# Supplementary material for: An efficient and facile strategy for trifluoromethylation and perfluoroalkylation of isoquinolines and heteroarenes
Source: Royal Society of Chemistry journal article supplement (doi:10.1039/d0cc00963f), 2020-01-01

## Supporting Information

### **An efficient and facile strategy for trifluoromethylation and perfluoroalkylation of isoquinolines and heteroarenes**

**Yang Pan<sup>[a],[b]</sup>, Jiangtao Li<sup>[a],[b]</sup>, Zhefeng Li<sup>[c]</sup>, Feng Huang,<sup>a</sup> Xiaofeng, Ma<sup>[a]</sup>,  
Wei Jiao<sup>\*[a]</sup> and Huawu Shao<sup>\*[a]</sup>**

*<sup>a</sup> Natural Products Research Center, Chengdu Institute of Biology,  
Chinese Academy of Sciences, Chengdu 610041, China*

*<sup>b</sup> University of Chinese Academy of Sciences, China*

*<sup>c</sup> School of Chemistry and Chemical Engineering, Chongqing University,  
Chongqing 400044, China.*

\*Correspondence author: E-mail: shaohw@cib.ac.cn

Fax: (+86) 028-82890288

## Table of contents

|                                                                                                 |     |
|-------------------------------------------------------------------------------------------------|-----|
| 1. General information.....                                                                     | S3  |
| 2. Optimization of the reaction conditions.....                                                 | S3  |
| 3. General procedure for the trifluoromethylation of isoquinolines.....                         | S5  |
| 4. Gram-scale synthesis of <b>3c</b> and <b>3k</b> .....                                        | S6  |
| 5. The study on the mechanism.....                                                              | S7  |
| 6. References.....                                                                              | S49 |
| 7. Characterization data for the products.....                                                  | S51 |
| 8. <sup>1</sup> H NMR, <sup>13</sup> C NMR and <sup>19</sup> F NMR spectra of the products..... | S63 |

## 1. General information

All commercially sourced reagents were used as supplied unless otherwise stated. The  $^1\text{H}$  NMR,  $^{13}\text{C}$  NMR and  $^{19}\text{F}$  NMR spectra were recorded on a Bruker Avance 400 spectrometer (400 MHz, 101 MHz or 376 MHz, respectively).  $^1\text{H}$  NMR chemical shifts are reported in ppm ( $\delta$ ) relative to tetramethylsilane (TMS) with the solvent resonance employed as the internal standard ( $\text{CDCl}_3$ ,  $\delta$  7.26 ppm).  $^{13}\text{C}$  NMR chemical shifts were determined relative to the solvent:  $\text{CDCl}_3$  at  $\delta$  77.16 ppm. High resolution mass spectroscopy data of the products were collected on a BioTOF Q instrument. Visualization on TLC was achieved by UV light (254 nm). Flash chromatography was performed on silica gel 90, 200-300 mesh.

## 2. Optimization of the reaction conditions

**Table S1.** Screening reaction conditions for trifluoromethylation of isoquinoline.<sup>a</sup>

|       | 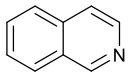 | +              | $\text{TMSCF}_3$ | $\xrightarrow[\text{solvent, temp., 24h}]{\text{Oxidant fluoride source}}$ |  |  |
|-------|-------------------------------------------------------------------------------------|----------------|------------------|----------------------------------------------------------------------------|---------------------------------------------------------------------------------------|--|
|       | 1a                                                                                  |                | 2a               |                                                                            | 3a                                                                                    |  |
| Entry | Oxidant                                                                             | F <sup>-</sup> | Temp.<br>(°C)    | Solvent                                                                    | Yield <sup>b</sup> (%)                                                                |  |
| 1     | PIFA                                                                                | KF             | r.t.             | $\text{CH}_3\text{CN}$                                                     | trace                                                                                 |  |
| 2     | PIFA                                                                                | KF             | r.t.             | dioxane                                                                    | n.r.                                                                                  |  |
| 3     | PIFA                                                                                | KF             | r.t.             | MeOH                                                                       | n.r.                                                                                  |  |
| 4     | PIFA                                                                                | KF             | r.t.             | toluene                                                                    | n.r.                                                                                  |  |
| 5     | PIFA                                                                                | KF             | r.t.             | THF                                                                        | trace                                                                                 |  |
| 6     | PIFA                                                                                | KF             | r.t.             | DMF                                                                        | 10                                                                                    |  |
| 7     | PIFA                                                                                | KF             | r.t.             | NMP                                                                        | 57                                                                                    |  |
| 8     | PIDA                                                                                | KF             | r.t.             | NMP                                                                        | 6                                                                                     |  |
| 9     | TBHP                                                                                | KF             | r.t.             | NMP                                                                        | n.r.                                                                                  |  |
| 10    | $\text{K}_2\text{S}_2\text{O}_8$                                                    | KF             | r.t.             | NMP                                                                        | n.r.                                                                                  |  |

|                 |      |      |      |     |       |
|-----------------|------|------|------|-----|-------|
| 11              | PIFA | CsF  | r.t. | NMP | 52    |
| 12              | PIFA | TBAF | r.t. | NMP | trace |
| 13              | PIFA | AgF  | r.t. | NMP | n.r.  |
| 14              | PIFA | KF   | 0    | NMP | 73    |
| 15              | PIFA | KF   | -10  | NMP | 66    |
| 16 <sup>c</sup> | PIFA | KF   | 0    | NMP | 42    |
| 17 <sup>d</sup> | PIFA | KF   | 0    | NMP | 65    |

<sup>a</sup> Reaction conditions: **1a** (0.2 mmol), TMSCF<sub>3</sub> (3.0 equiv.), oxidant (3.0 equiv.), fluoride source (4.0 equiv.) in 2.0 mL anhydrous solvent for 24 h under Ar. <sup>b</sup> Isolated yield. n.r. = no reaction. <sup>c</sup> TMSCF<sub>3</sub> (2.0 equiv.), PIFA (2.0 equiv.), KF (2.0 equiv.). <sup>d</sup> TMSCF<sub>3</sub> (4.0 equiv.), PIFA (4.0 equiv.), KF (4.0 equiv.).

**Table S2. Screening of hypervalent iodine reagents (HIRs) under optimized condition.**

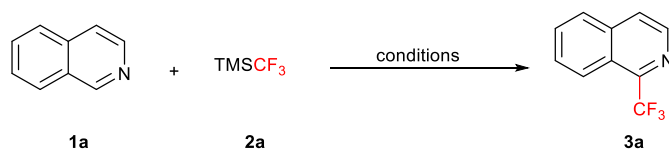

| Entry | HIRs                  | Temp. (°C) | Solvent | Yield(%) <sup>a</sup> |
|-------|-----------------------|------------|---------|-----------------------|
| 1     | Koser's reagent       | 0          | NMP     | 4                     |
| 2     | Togni's reagent<br>II | 0          | NMP     | n.r.                  |
| 3     | BI-OH                 | 0          | NMP     | n.r.                  |
| 4     | BI-OAc                | 0          | NMP     | n.r.                  |
| 5     | PhIO                  | 0          | NMP     | 7                     |
| 6     | PhIO <sub>2</sub>     | 0          | NMP     | n.r.                  |
| 7     | IBX                   | 0          | NMP     | n.r.                  |
| 8     | DMP                   | 0          | NMP     | n.r.                  |
| 9     | Koser's reagent       | r.t.       | NMP     | 3                     |

|    |      |      |                    |      |
|----|------|------|--------------------|------|
| 10 | PhIO | r.t. | NMP                | 5    |
| 11 | PhIO | 0    | CH <sub>3</sub> CN | n.r. |
| 12 | PhIO | 0    | DMF                | n.r. |
| 13 | PhIO | 0    | MeOH               | n.r. |
| 14 | PhIO | 0    | DCM                | n.r. |

<sup>a</sup> Reaction conditions: **1a** (0.2 mmol), TMSCF<sub>3</sub> (3.0 equiv.), HIRs (3.0 equiv.), KF (4.0 equiv.) in 2.0 mL anhydrous solvent for 24 h under Ar. <sup>b</sup> Isolated yield. n.r. = no reaction.

**HIRs:**

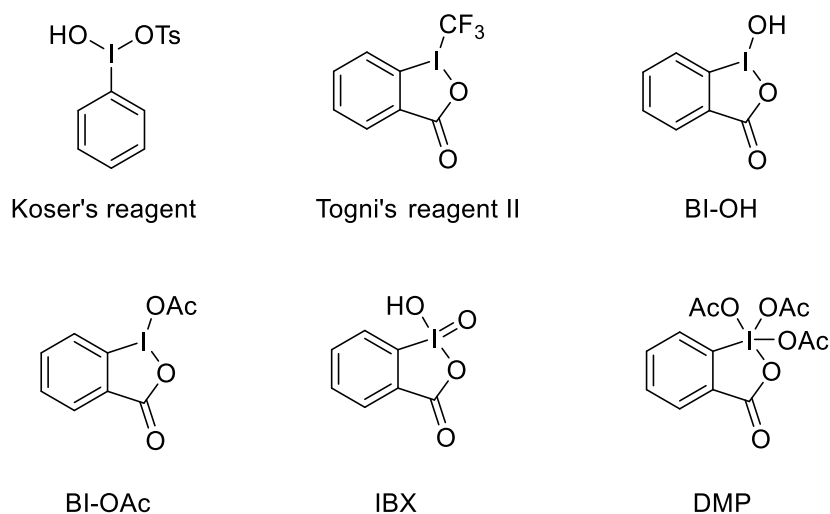

### 3. General procedure for the trifluoromethylation of isoquinolines

In an argon glovebox, isoquinoline **1a** (0.2 mmol, 23.5  $\mu$ L), PIFA (3.0 equiv., 258 mg), and KF (4.0 equiv., 46.5 mg) weighed into an oven-dried glass vial equipped with a stir bar. The vial was sealed with a septum and brought outside of the glovebox. Under Ar, anhydrous NMP (2.0 mL) and TMSCF<sub>3</sub> (3.0 equiv, 90  $\mu$ L) were added in quick succession to the glass vial by syringe. The mixture was then allowed to stir at 0  $^{\circ}$ C for 24 hours. After complete consumption of substrates (monitored by TLC), the resulting mixture was diluted with EtOAc and washed by saturated NaHCO<sub>3</sub> solution ( $\times$ 2). The organic layer was dried over Na<sub>2</sub>SO<sub>4</sub> and concentrated under vacuum. The crude product was purified by silica gel column chromatography using 5% EtOAc/petroleum ether as the eluent (The reaction of **1a** as an example).

#### 4. Gram-scale synthesis of 3c and 3k

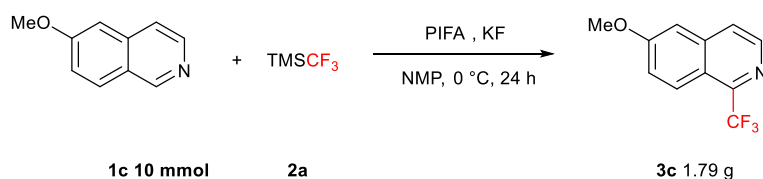

**Scheme S1.** Gram-scale synthesis of 3c

In an argon glovebox, 6-methoxyisoquinoline **1c** (10 mmol, 1.59 g), PIFA (3.0 equiv., 12.9 g), and KF (4.0 equiv., 3.4 g) weighed into an oven-dried glass vial equipped with a stir bar. The vial was sealed with a septum and brought outside of the glovebox. Under Ar, anhydrous NMP (200 mL) and TMSCF<sub>3</sub> (3.0 equiv., 4.4 mL) were added in quick succession to the round-bottomed flask by syringe. The mixture was then allowed to stir at 0 °C for 24 hours. After complete consumption of substrates (monitored by TLC), the resulting mixture was diluted with EtOAc and washed by saturated NaHCO<sub>3</sub> solution (×2). The organic layer was dried over Na<sub>2</sub>SO<sub>4</sub> and concentrated under vacuum. The crude product was purified by silica gel column chromatography using 5% EtOAc/petroleum ether as the eluent to give the product **3c** (1.79 g, 79%).

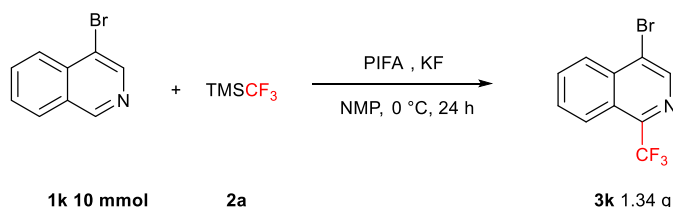

**Scheme S2.** Gram-scale synthesis of 3k

In an argon glovebox, 4-bromoisoquinoline **1k** (10 mmol, 2.07 g), PIFA (3.0 equiv., 12.9 g), and KF (4.0 equiv., 3.4 g) weighed into an oven-dried glass vial equipped with a stir bar. The vial was sealed with a septum and brought outside of the glovebox. Under Ar, anhydrous NMP (200 mL) and TMSCF<sub>3</sub> (3.0 equiv., 4.4 mL) were added in quick succession to the round-bottomed flask by syringe. The mixture was then allowed to stir at 0 °C for 24 hours. After complete consumption of substrates (monitored by TLC), the resulting mixture was diluted with EtOAc and washed by saturated NaHCO<sub>3</sub> solution (×2). The organic layer was dried over Na<sub>2</sub>SO<sub>4</sub>

and concentrated under vacuum. The crude product was purified by silica gel column chromatography using 5% EtOAc/petroleum ether as the eluent to give the product **3k** (1.34 g, 49%).

## 5. The study on the mechanism

### 5.1 The control experiments of mechanism study (Scheme S3):

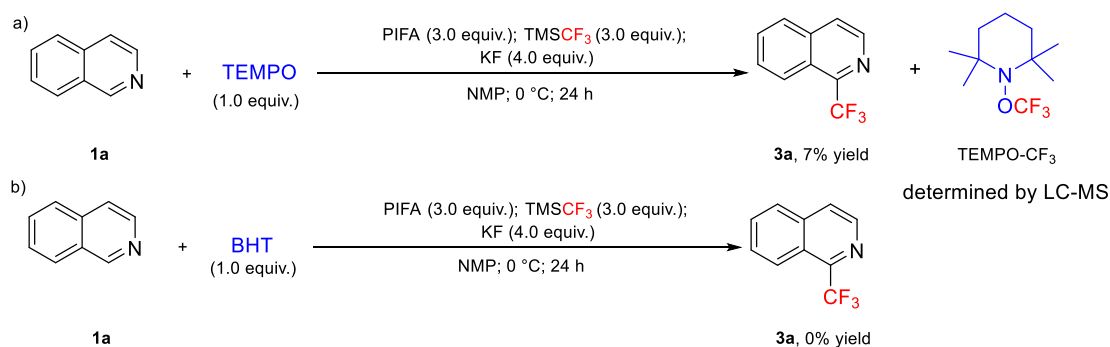

**Scheme S3** The control experiments of mechanism study

In order to gain preliminary mechanism information about this reaction, several control experiments were conducted using **1a** as a substrate.

- In an argon glovebox, isoquinoline **1a** (0.2 mmol, 23.5  $\mu\text{L}$ ), PIFA (3.0 equiv, 258 mg), KF (4.0 equiv, 46.5 mg) and 2,2,6,6-tetramethyl-1-piperidinyloxy (TEMPO) (0.2 mmol, 31.2 mg) weighed into an oven-dried glass vial equipped with a stir bar. Under Ar, NMP (2.0 mL) and TMSCF<sub>3</sub> (3.0 equiv, 90  $\mu\text{L}$ ) were added in quick succession to the glass vial by syringe. The vial was sealed with a septum and brought outside of the glovebox. The mixture was then allowed to stir at 0  $^\circ\text{C}$  for 24 hours. After the reaction, the mixture was then analyzed directly by LC-MS, and TEMPO-CF<sub>3</sub> adduct was detected. Finally, the product **3a** was isolated in 7% yield.
- In an argon glovebox, isoquinoline **1a** (0.2 mmol, 23.5  $\mu\text{L}$ ), PIFA (3.0 equiv., 258 mg), KF (4.0 equiv., 46.5 mg) and 2,6-di-*tert*-butyl-4-methylphenol (BHT) (0.2 mmol, 44 mg) weighed into an oven-dried glass vial. Under Ar, NMP (2.0 mL) and TMSCF<sub>3</sub> (3.0 equiv., 90  $\mu\text{L}$ ) were added in quick succession to the glass vial by syringe equipped with a stir bar. The vial was sealed with a septum and brought

outside of the glovebox. The mixture was then allowed to stir at 0 °C for 24 hours. After the reaction, no **3a** was detected.

We then used high resolution electrospray ionization mass spectra (HRMS-ESI) to detect the possibility of active intermediate  $[\text{Ph-I-CF}_3]^+$  in the reaction process.<sup>1</sup> Samples were taken at 5 minutes, 30 minutes and 60 minutes respectively after the beginning of the reaction and diluted with MeCN prior to the injection into the mass spectrometer. However, the possible intermediate  $[\text{Ph-I-CF}_3]^+$  don't be detected. The results are as follows: the intermediate  $[\text{Ph-I-CF}_3]^+$  ( $\text{C}_7\text{H}_5\text{F}_3\text{I}$ ) did not be observed.

5 mins

| . | Formula                                  | Neutral mass (Da) | Observed m/z | Mass error (mDa) | Mass error (ppm) | Response | Adducts | Identification status |
|---|------------------------------------------|-------------------|--------------|------------------|------------------|----------|---------|-----------------------|
| 1 | $\text{C}_7\text{H}_5\text{F}_3\text{I}$ | 272.93880         |              |                  |                  |          |         | Not Observed          |

Item description:

Channel name: Time NaN +/- 0.0500 minutes

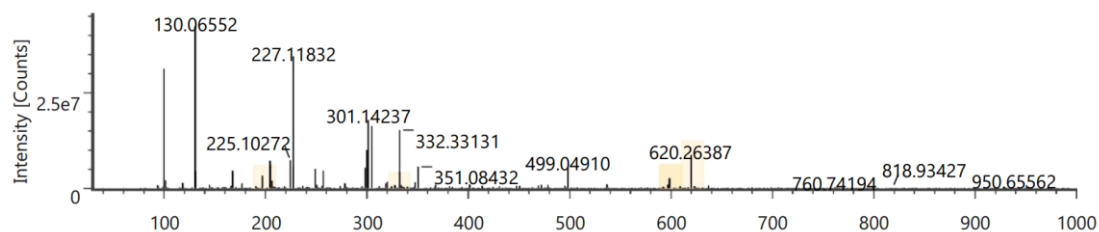

30 mins

| . | Formula                                  | Neutral mass (Da) | Observed m/z | Mass error (mDa) | Mass error (ppm) | Response | Adducts | Identification status |
|---|------------------------------------------|-------------------|--------------|------------------|------------------|----------|---------|-----------------------|
| 1 | $\text{C}_7\text{H}_5\text{F}_3\text{I}$ | 272.93880         |              |                  |                  |          |         | Not Observed          |

Item description:

Channel name: Time NaN +/- 0.0500 minutes

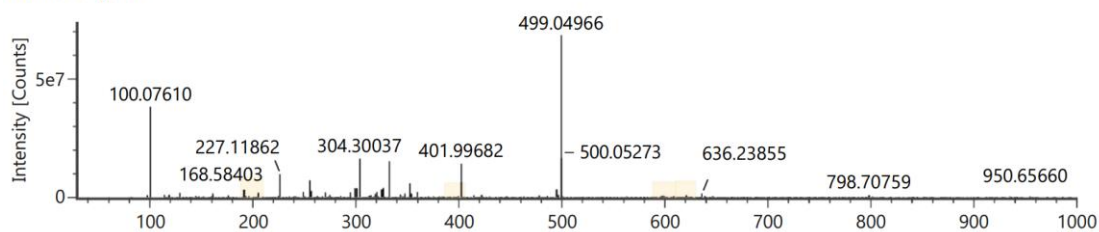

60 mins



|   | Formula                                        | Neutral mass (Da) | Observed m/z | Mass error (mDa) | Mass error (ppm) | Response | Adducts | Identification status |
|---|------------------------------------------------|-------------------|--------------|------------------|------------------|----------|---------|-----------------------|
| 1 | C <sub>7</sub> H <sub>5</sub> F <sub>3</sub> I | 272.93880         |              |                  |                  |          |         | Not Observed          |

Item description:

Channel name: Time NaN +/- 0.0500 minutes

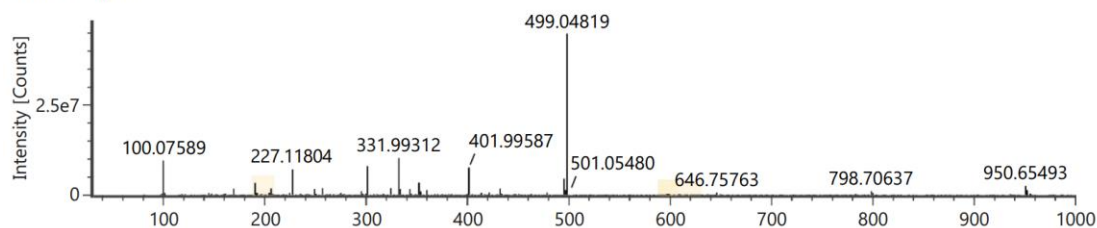

In conclusion, based on the radical trap experiments and detected results of HRMS-ESI, the CF<sub>3</sub> radical addition process was probably involved in our system.

## 5.2 Density functional theory (DFT) calculations

All geometries were fully optimized at the B3LYP<sup>2</sup> functional level of density functional theory and 6-31G(d) basis set,<sup>3</sup> using the SDD pseudopotential<sup>4</sup> for the iodine, considering Grimme's DFT empirical dispersion correction with Becke-Johnson damping scheme (D3BJ).<sup>5</sup> Solvation effects were accounted for polarisable continuum model (PCM)<sup>6</sup> with solvent parameters of NMP including static dielectric constant (298 K) and dynamic dielectric constant. Vibrational frequencies were calculated at the same level to identify stationary points as local minima (no imaginary frequency) or transition states (only one imaginary frequency) which were checked by the calculations of intrinsic reaction coordinate (IRC).<sup>7</sup> The wave function stability of broken-symmetry singlet states was verified. The single-point energy calculations were performed based on optimized structures, employing the 6-311+G (d, p) basis set for all atoms in combination with the SDD pseudopotential for iodine, considering also DFT-D3BJ empirical dispersion correction and PCM solvation model. The Gibbs free energy was determined according to the single-point energy and the thermal correction to the Gibbs free energy obtained from the vibrational frequency analysis at the experimental reaction temperature (0 °C), together with DFT-D3BJ empirical dispersion correction. All DFT calculations were carried out with Gaussian 16 program.<sup>8</sup>

The polarization parameter function ( $\zeta$ )<sup>9</sup> was calculated by Multiwfn<sup>10</sup> and then

plotted on the electron density isosurface.

$$\zeta(\mathbf{r}) = (\rho^\alpha(\mathbf{r}) - \rho^\beta(\mathbf{r})) / (\rho^\alpha(\mathbf{r}) + \rho^\beta(\mathbf{r}))$$

$\rho^\alpha$ :  $\alpha$  electron density

$\rho^\beta$ :  $\beta$  electron density

This function shows the ratio of unpaired electrons to total electrons on the molecule.

### 5.2.1 The Description for DFT Calculations

The most preferred reaction pathway was presented in Figure S1. From the energy profile, the trifluoromethylation process and the whole SET (single electron transfer) step was shown (Figure S1). Theoretical calculations indicated that the net reaction leading to **3a** had a large thermodynamic driving force of ca. 120.3 kcal/mol. The N atom of isoquinoline **1a** firstly formed a stable complex with PIFA and caused little energy increase (0.7 kcal/mol). The structure of complex was predicted by the potential energy scanning and conformer search. Further, the decarboxylation and participation of  $\text{CF}_3^-$  happened to get the stable **INT1**. The subsequent homolysis resulted in the broken-symmetry singlet state **INT2** with the rise of energy (19.3 kcal/mol). The broken-symmetry singlet state **TS** with 7-membered ring generated to produce the final **1a**, PhI and TFA. The energy barrier was 3.5 kcal/mol from **INT2** to **TS**. The detailed transformation process of transient state **TS** was shown in the IRC plot (Figure S2).

As seen in the intrinsic reaction coordinate (IRC) plot, the process of the **INT2** to go over the energy barrier was displayed clearly. There were two main parts for this transformation, the first one was the single electron transfer (SET) (the curve colored with red) and dehydrogenation (the curve colored with blue). After homolysis of **INT2**, the single electron was distributed on the iodine of  $\text{PhICOO CF}_3$  named  $\alpha$  electron and on the trifluoromethyl radical named  $\beta$  electron with the opposite spin direction. At the transition state on the top of energy barrier, the  $\beta$  electron “flowed” to the  $\text{PhICOO CF}_3$  gradually, which reflected by the shrink of the isosurface for the polarization parameter function ( $\zeta$ ) on iodine. Meantime, the energy also declined

dramatically. When the bond formed between the C-1 and CF<sub>3</sub> group, the  $\beta$  single electron was localized on C-3 mainly and finally transferred to PhICOO CF<sub>3</sub>. Then the CF<sub>3</sub>COO<sup>-</sup> left from PhICOO CF<sub>3</sub> and captured the hydrogen at C-1 to end up the charge transfer with the energy down.

We also tried to find the transition states on the C-3 position, but no reasonable result was obtained for the trifluoromethyl radical. Thus, it is believed that trifluoromethylation of C-3 in current reaction condition is not favorable. Furthermore, for explaining the selectivity and providing the prediction profile, the electron localization function (ELF), average Local ionization energy (ALIE), total electrostatic potential (ESP) and atomic charge (NPA charge) were evaluated for **1a-1 $\pi$**  and **3a-3 $\pi$** , and showed as graphical representation for distinguishing the differences easily (only the figures of **1a-1 $\pi$**  and **3a** was attached for the space limitations in this article). There were significant features at C-1 comparing to other position in the isoquinolines. For C-1, the values showed the weak localization of electron in the ELF map, difficult to participate in the electrophilic reaction comparing to other position in the ALIE map, and relative low electronegativity on the Van der Waals surface in ESP map. From these different four aspects, they suggested that relative deficiency for electron at C-1 and unbalance of electron distribution on the aromatic ring. This should be the driving force for the SET mechanism. From the representative product **3a**, the whole *N*-system was electron deficient due to the electron withdrawing of CF<sub>3</sub> group, but the electron distribution is not be changed. This is a main reason for the stop of trifluoromethylation of C-3 in the SET mechanism. In the different methods, readily available NPA charge is recommended for developing to prediction of this kind of reaction.

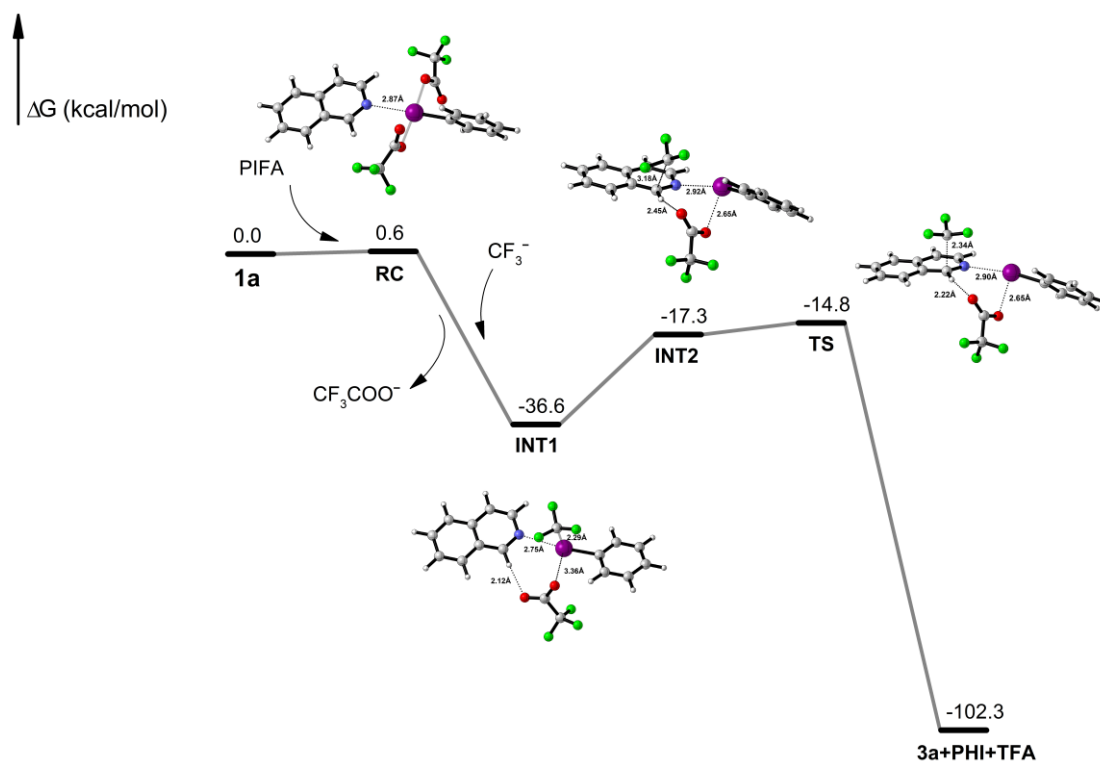

**Figure S1.** DFT-calculated energy profile of the trifluoromethylation of **1a**

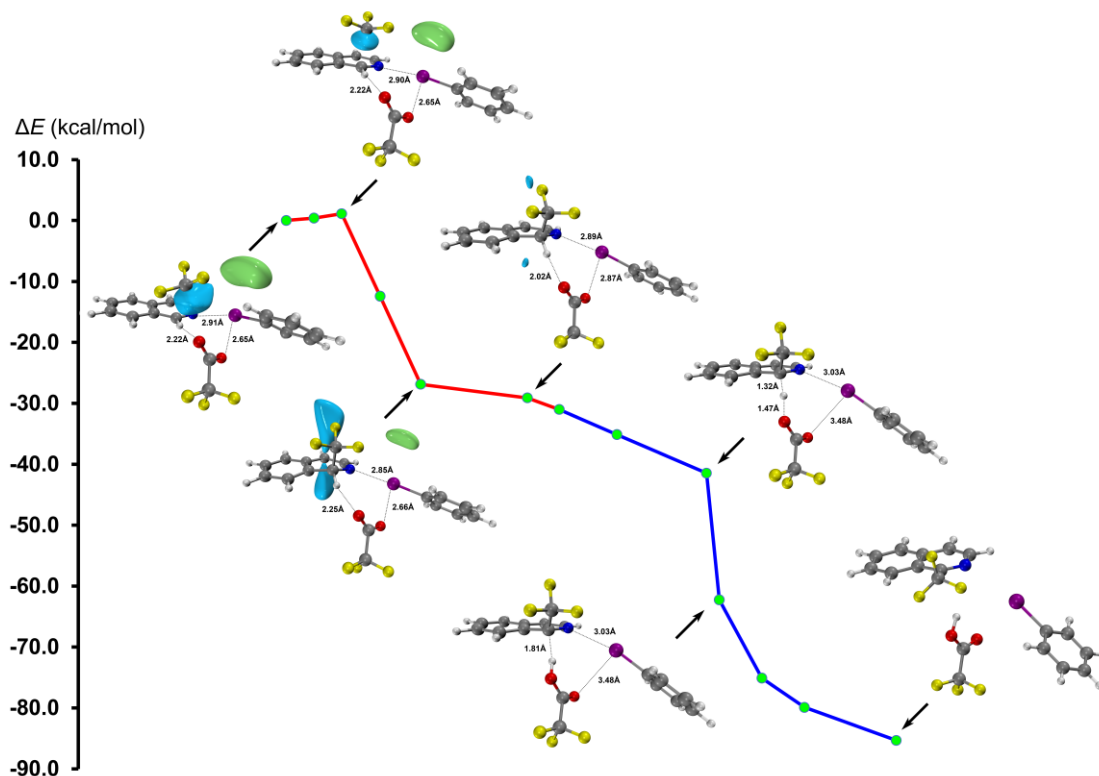

**Figure S2.** IRC plot of the key transition state TS with representative structures; carbon: gray, hydrogen: white, oxygen: red, nitrogen: blue, fluorine: yellow and iodine: purple. The single electron transfer showed by isosurface maps of polarization

parameter function on the structures (isovalue 0.3): green:  $\alpha$  electron, blue:  $\beta$  electron. The red curve is the process of the electron transfer, and the blue curve is dehydrogenation process.

### 5.2.2. Characteristics related with the wave function of 1a-1 $\pi$

All geometry optimizations and single-point energy calculations for the  $N$  electron systems were performed at the B3LYP/6-311+G (d,p) theoretical levels. All the optimizations met the “very tight” convergence criteria setting in the Gaussian 16 software. Characteristics related with the wave function were calculated using Multiwfn.

#### 1) Color-filled map of ELF (Electron Localization Function) of 1a-1 $\pi$ at 1.4 Å above the $N$ ring plane<sup>11</sup>

The ELF function can be represented in three-dimensional real space to show electron localization at different positions. The Large ELF value means that electrons are greatly localized.

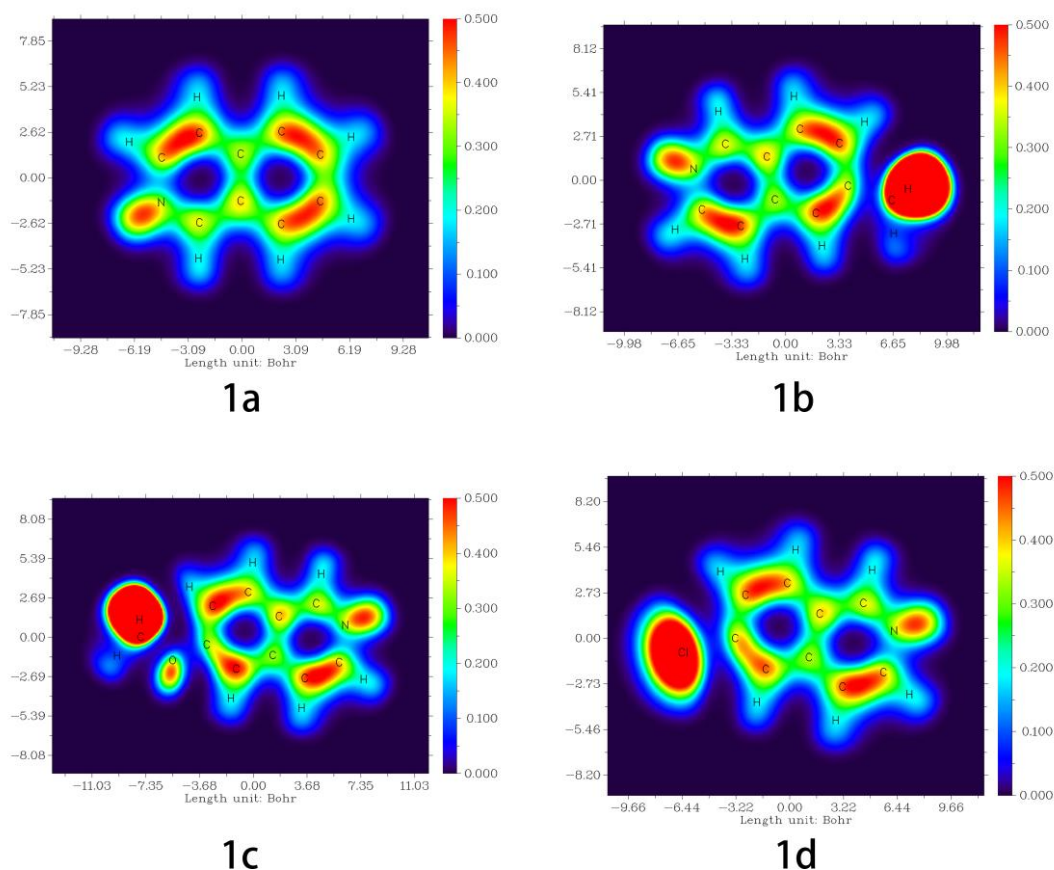

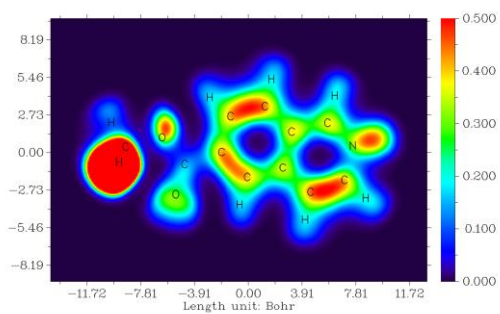

1e

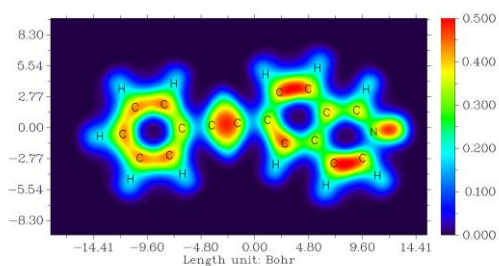

1f

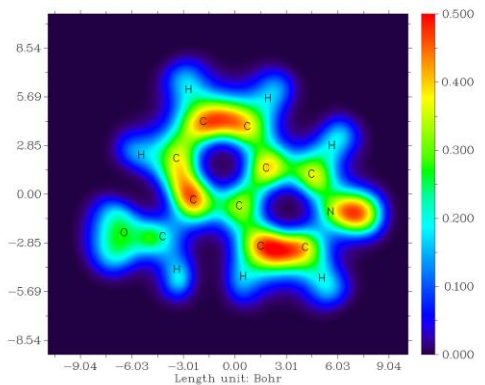

1g

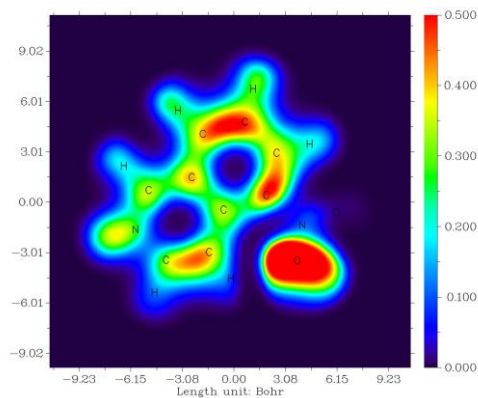

1h

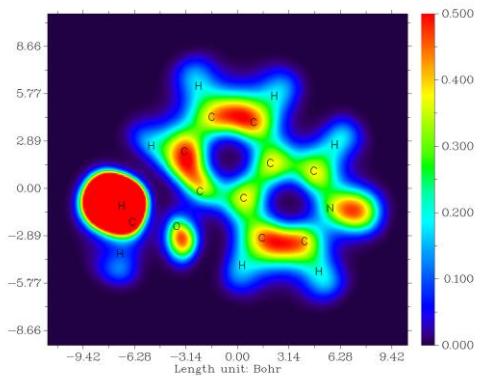

1i

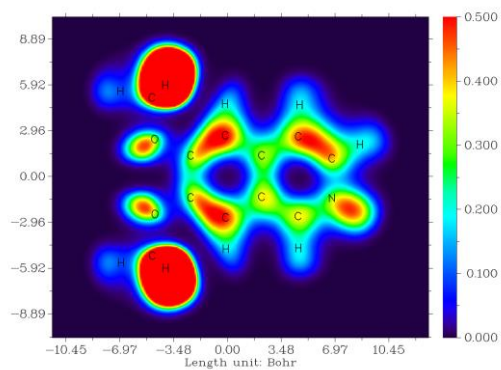

1j

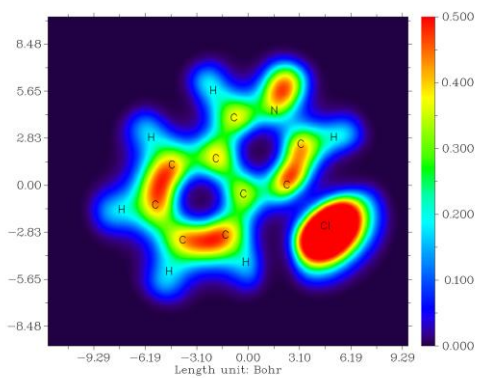

1k

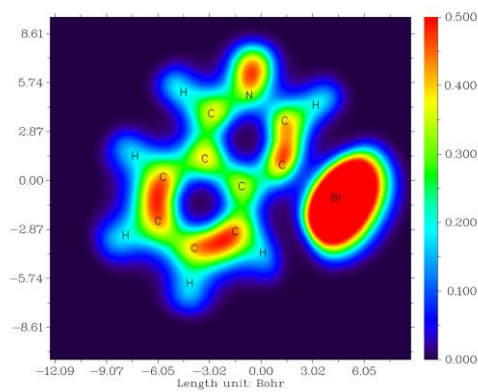

1l

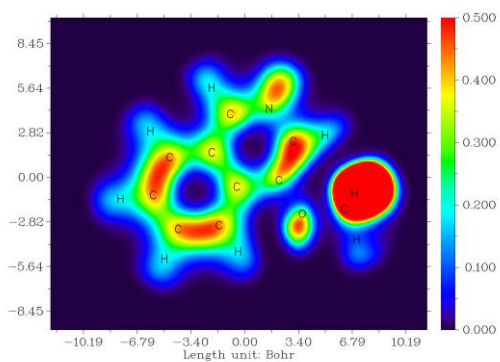

1m

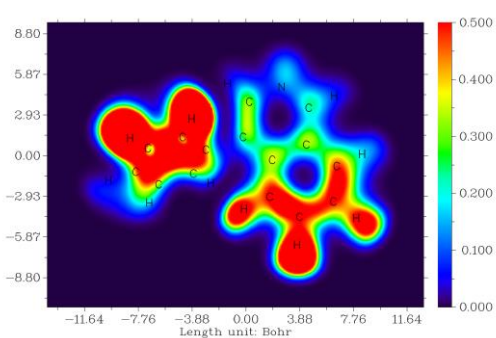

1n

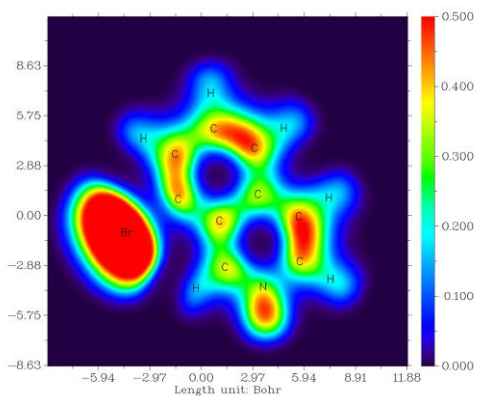

1o

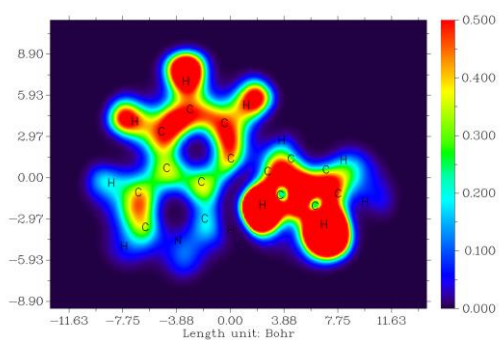

1p

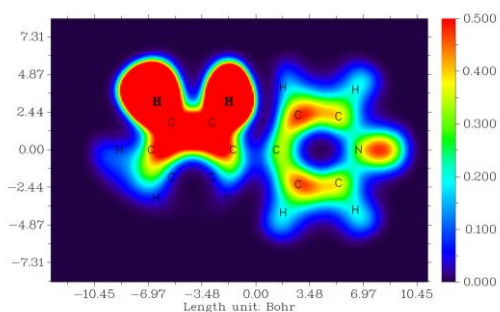

1q

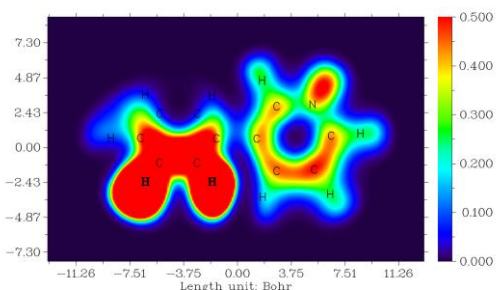

1r

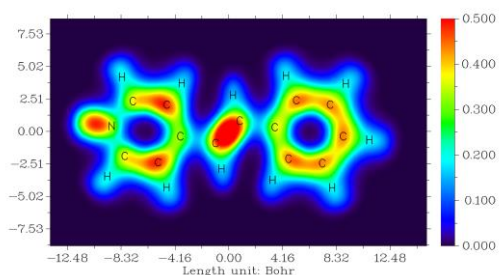

1s

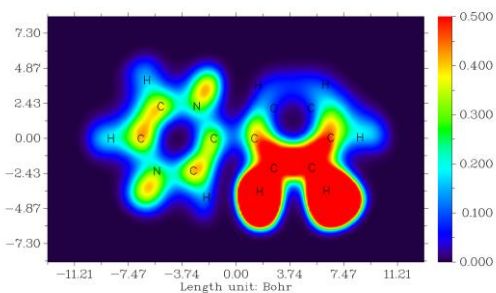

1t

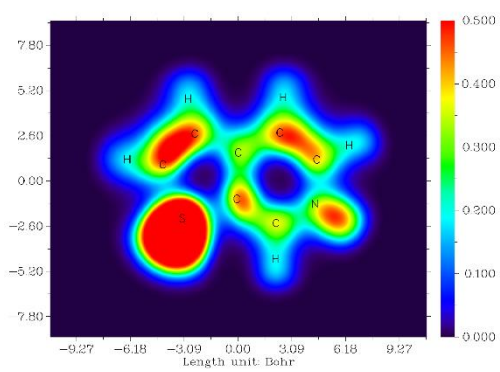

1u

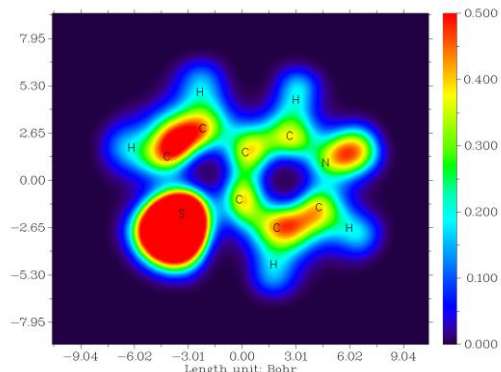

1v

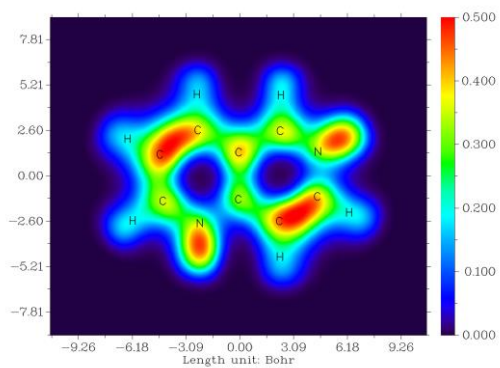

1w

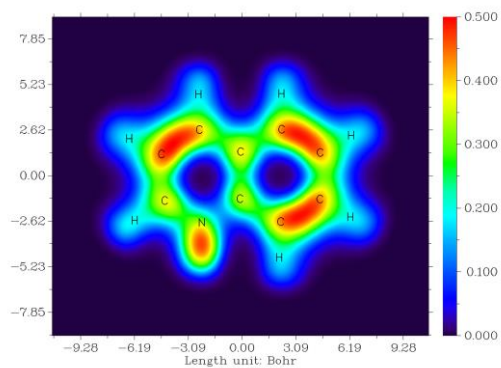

1x

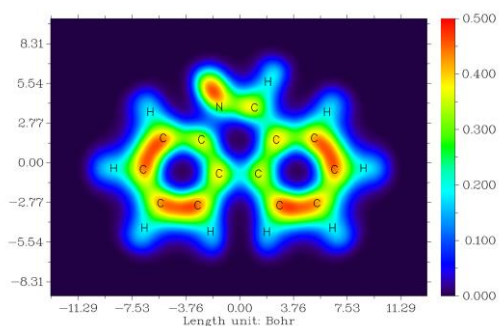

3y

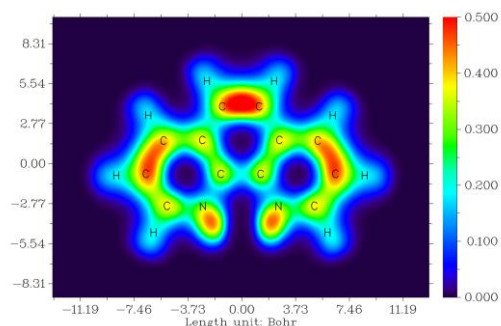

1z

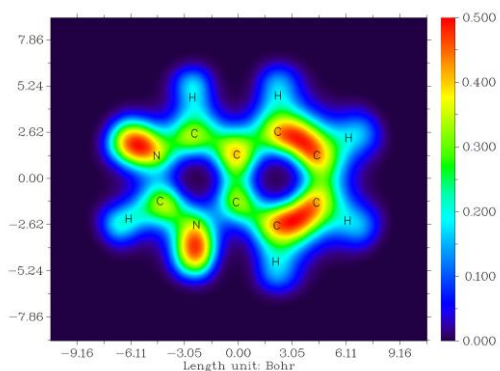

1π

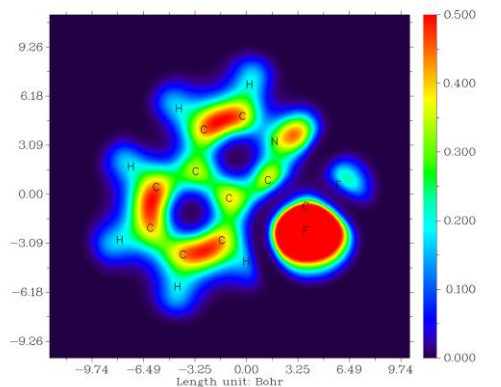

3a



## 2) Isosurface maps of ALIE (Average Local Ionization Energy) of 1a-1π (isovalue 0.001)<sup>12</sup>

Average local ionization energy is written as

$$\bar{I}(r) = \frac{\sum_i \rho_i(\mathbf{r}) |\varepsilon_i|}{\rho(\mathbf{r})}$$

Where  $\rho_i(\mathbf{r})$  and  $\varepsilon_i$  are the electron density function and orbital energy of the molecular orbital, respectively. Lower value of  $\bar{I}(r)$  indicates that the favored sites for reaction with electrophiles.

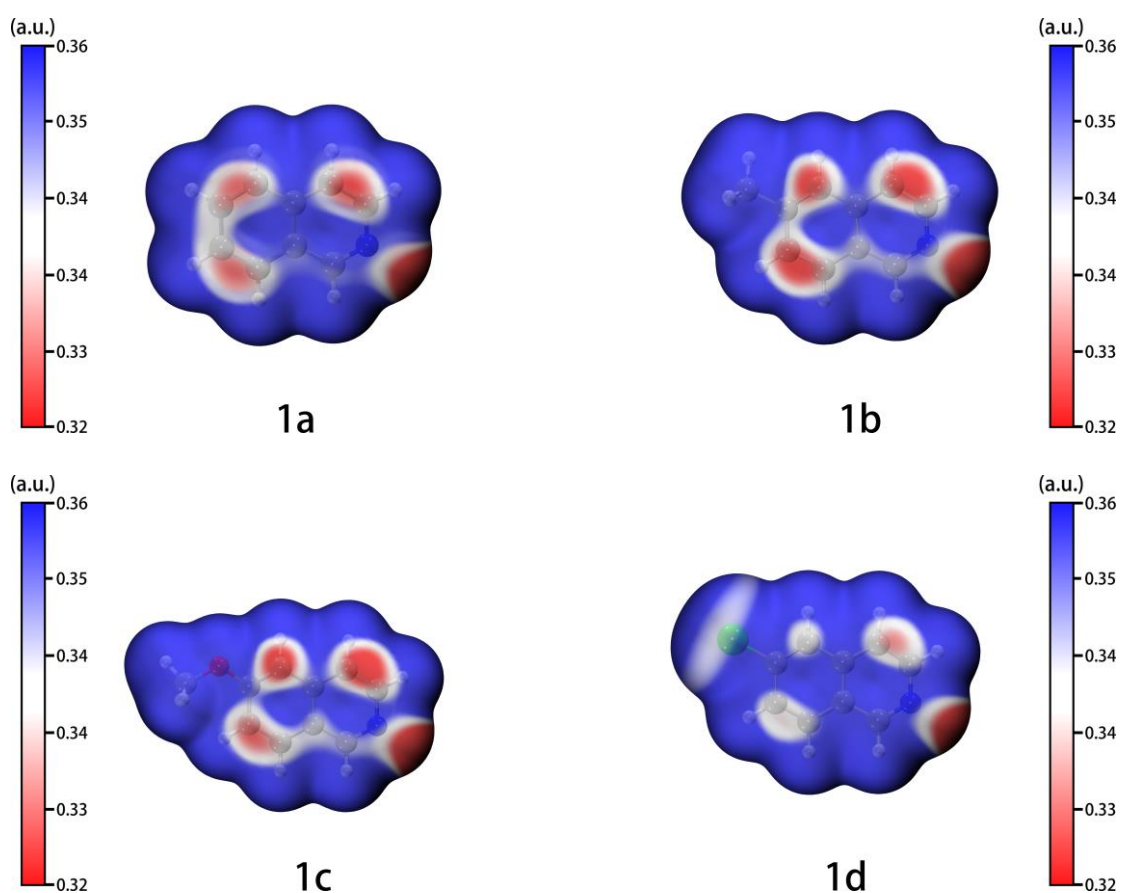

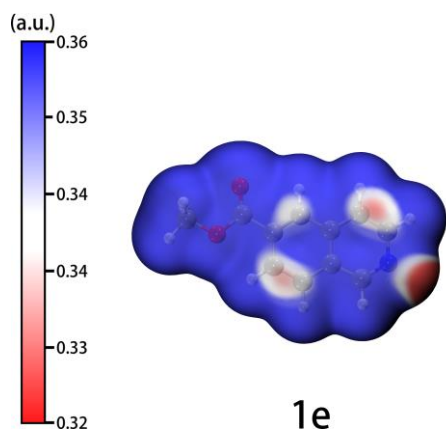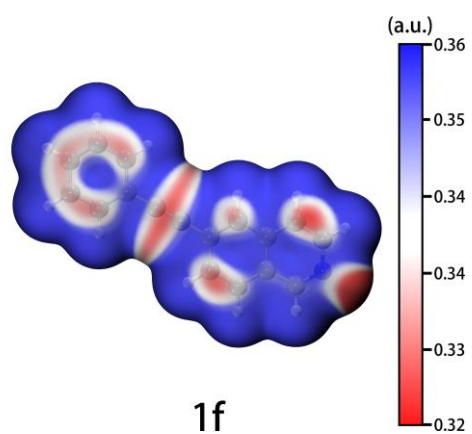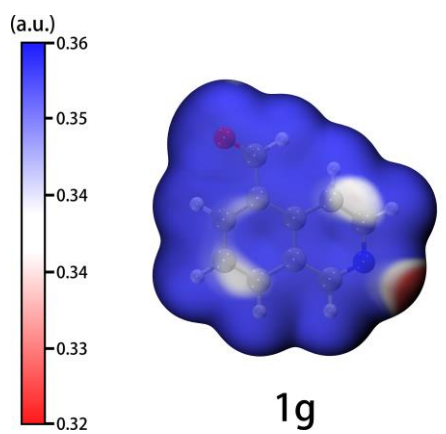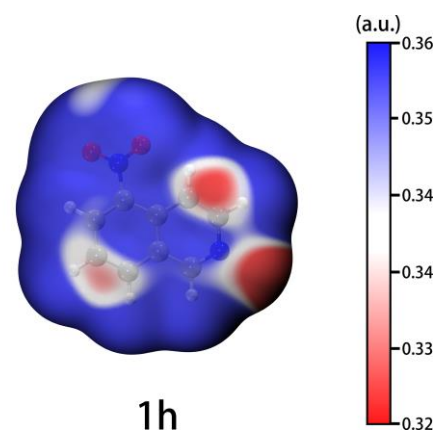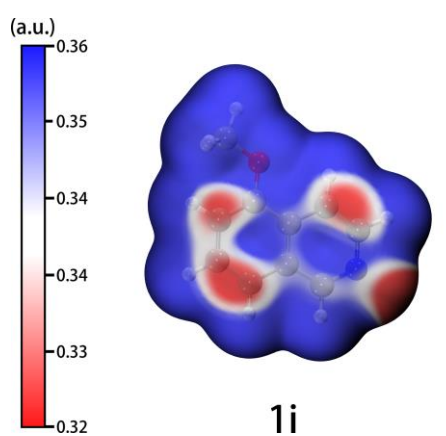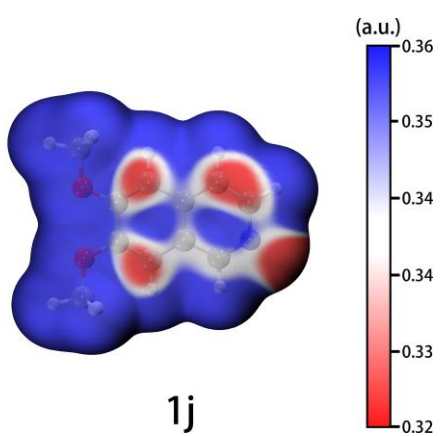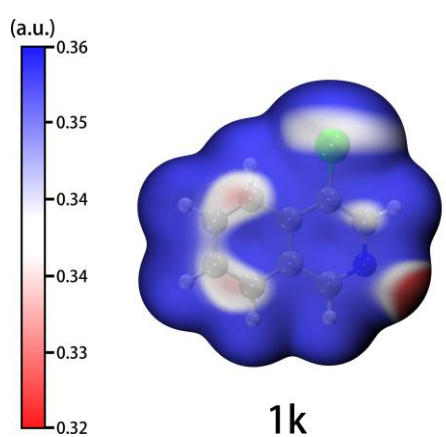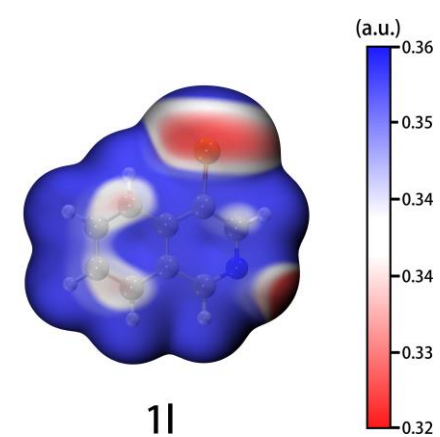

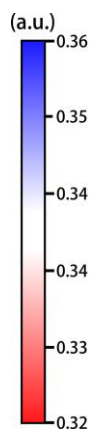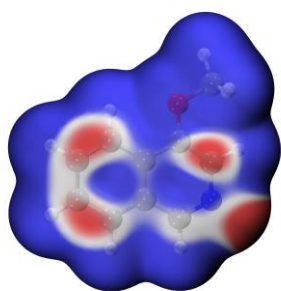

1m

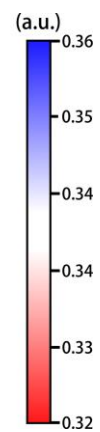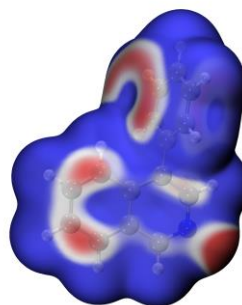

1n

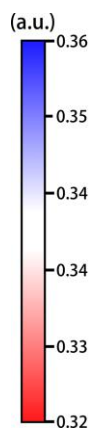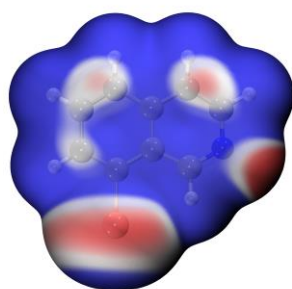

1o

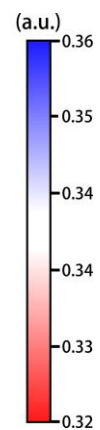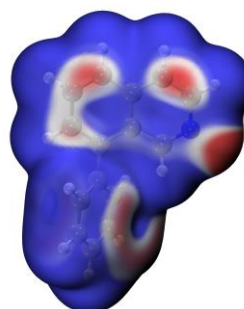

1p

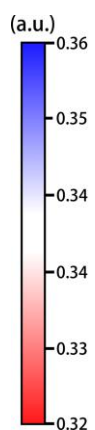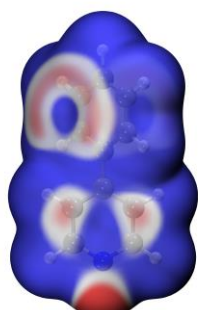

1q

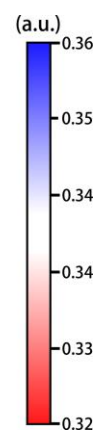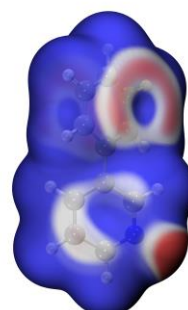

1r

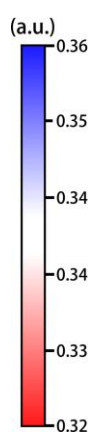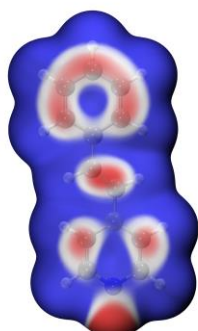

1s

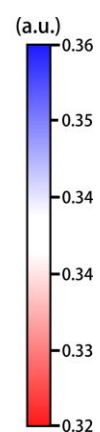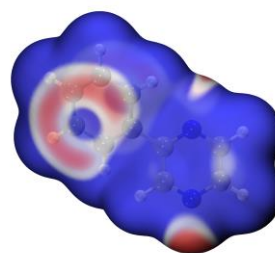

1t

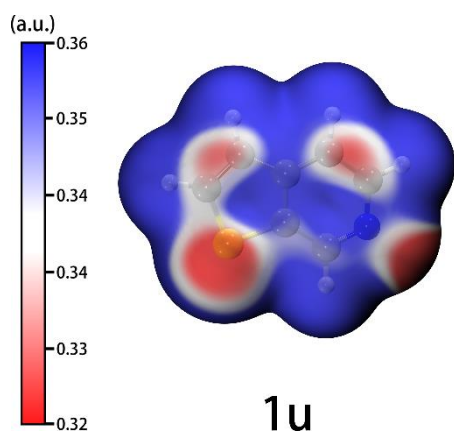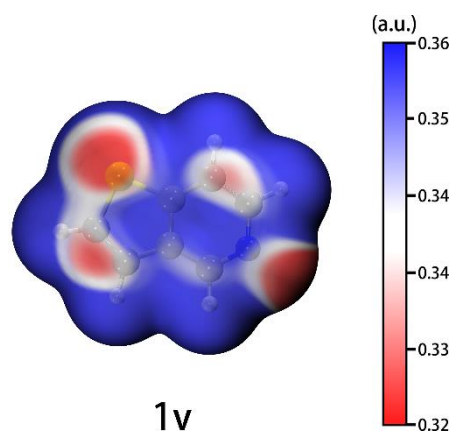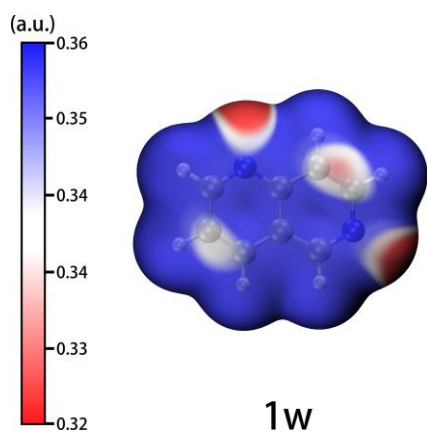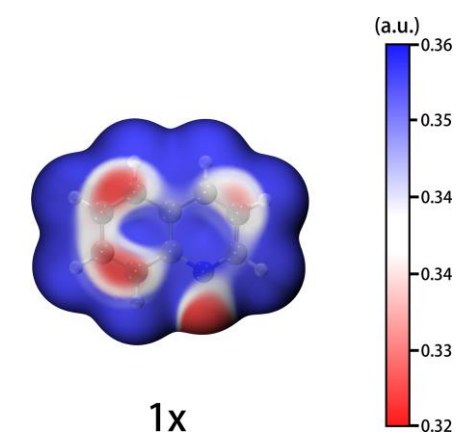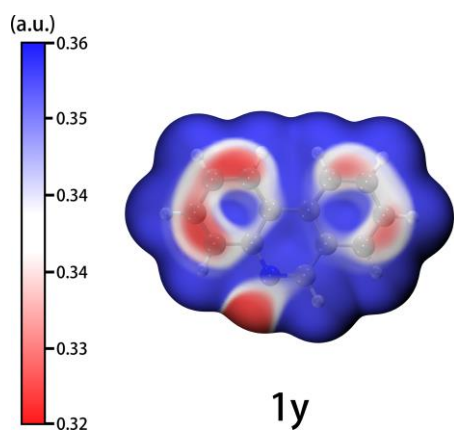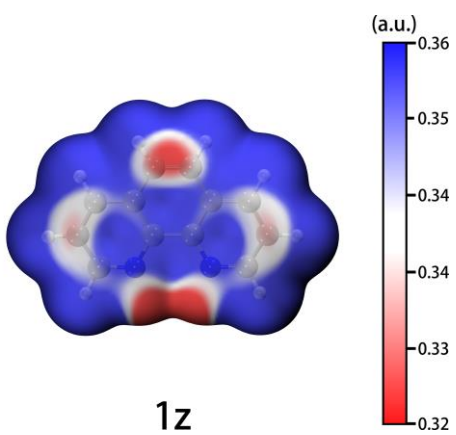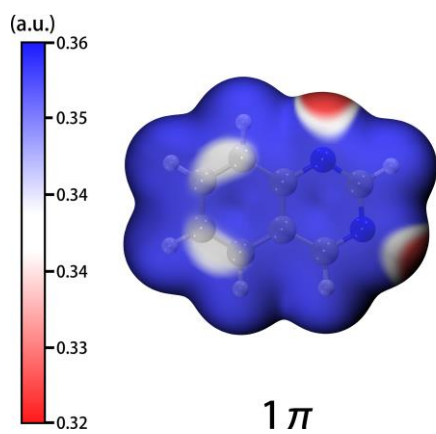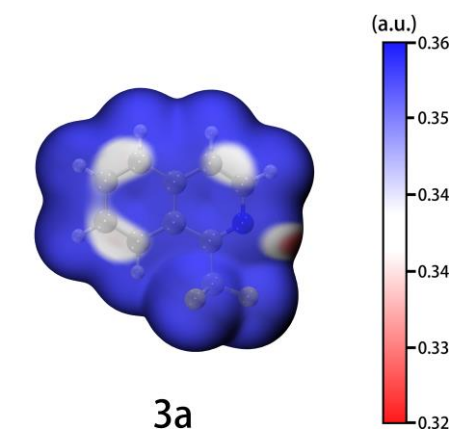

### 3) Color-filled map with contour lines of total ESP (Electrostatic Potential) at 1.8 Å below the *N* ring plane<sup>13</sup>

The molecule electrostatic potential  $V(\mathbf{r})$  is defined by the electronic density  $\rho(\mathbf{r})$  and the charges and positions of nuclei, which are assumed by be fixed in space. This function measures the electrostatic interaction between a unit point charge placed at  $\mathbf{r}$  and a positive (negative) value implies that current position is dominated by nuclear (electronic) charges.

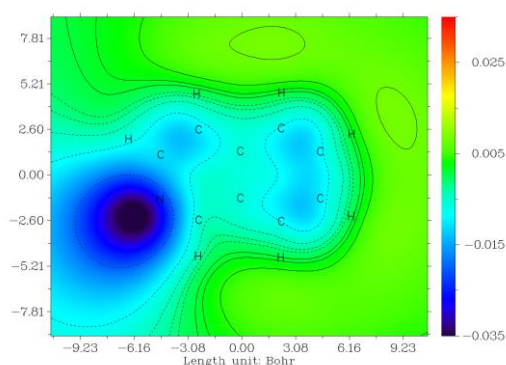

1a

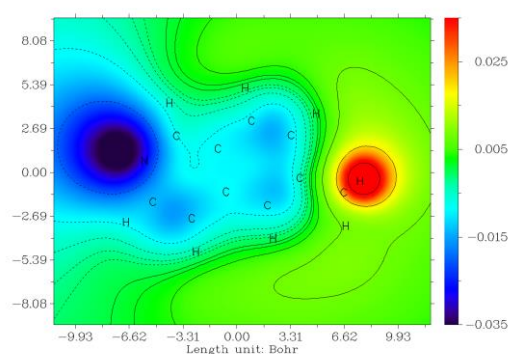

1b

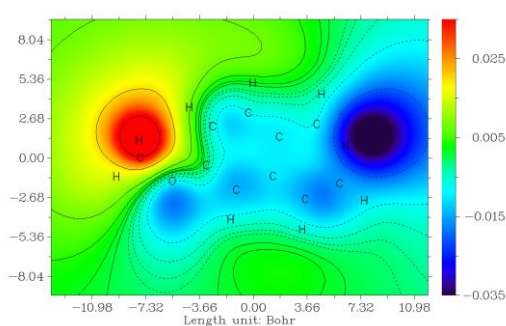

1c

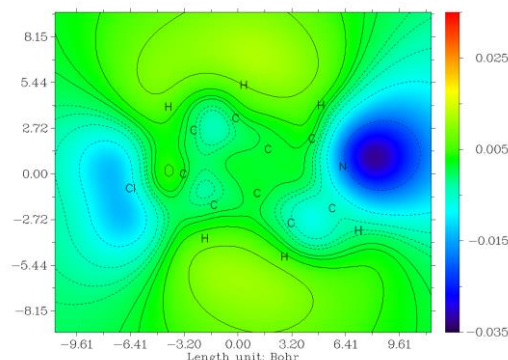

1d

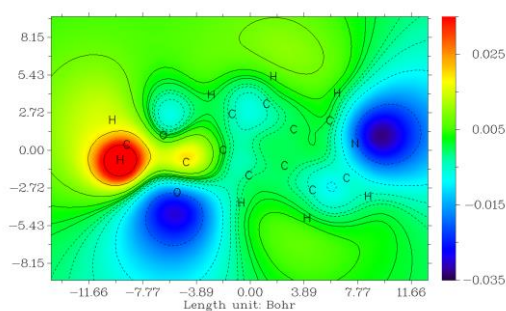

1e

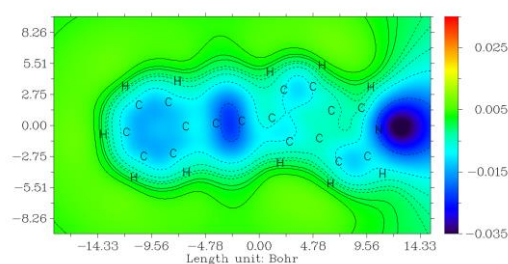

1f

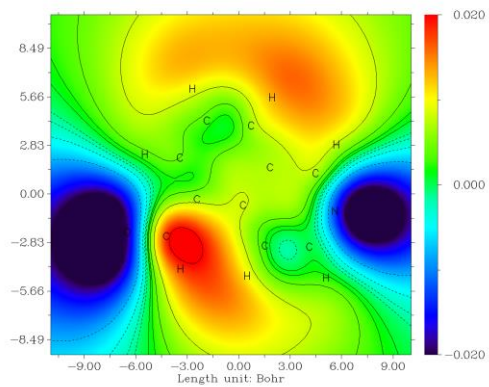

1g

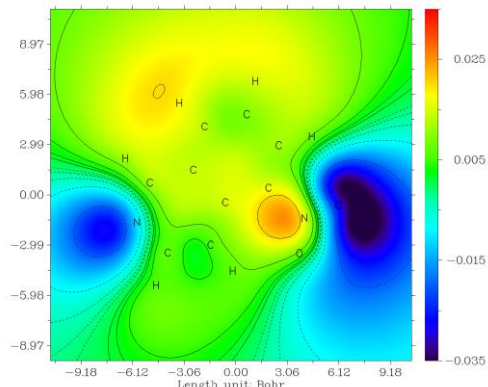

1h

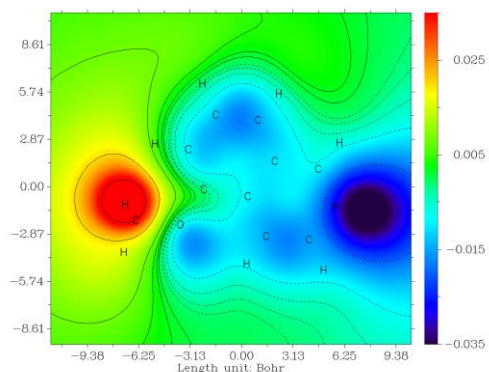

1i

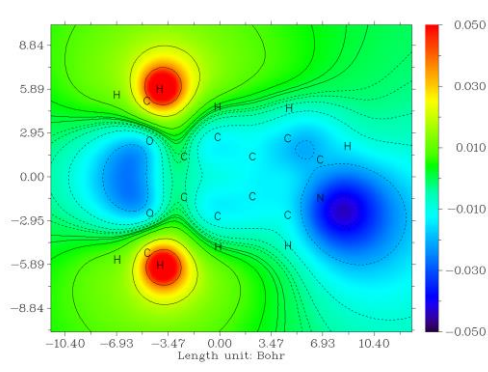

1j

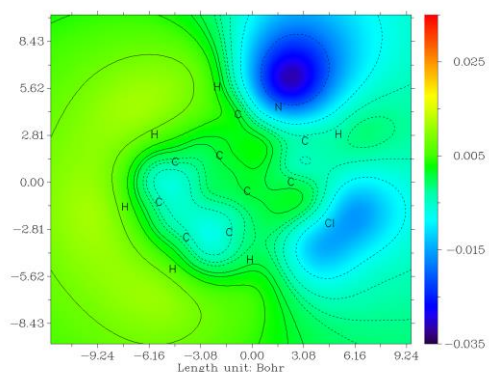

1k

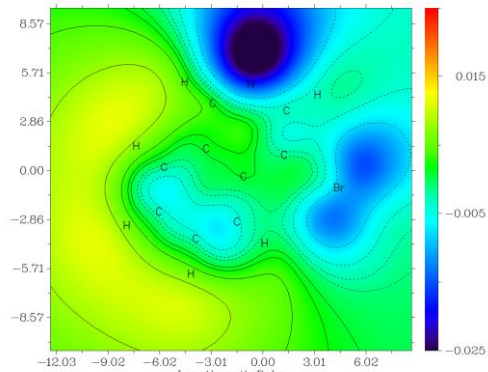

1l

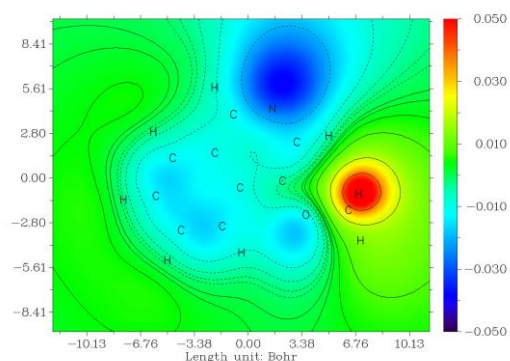

1m

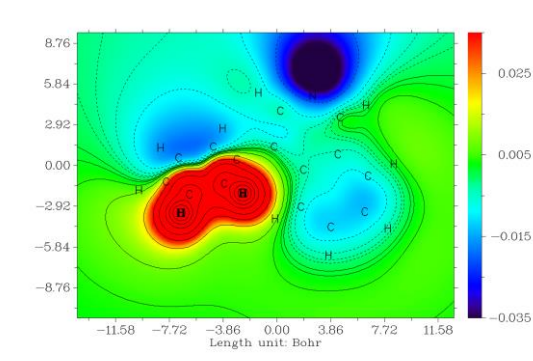

1n

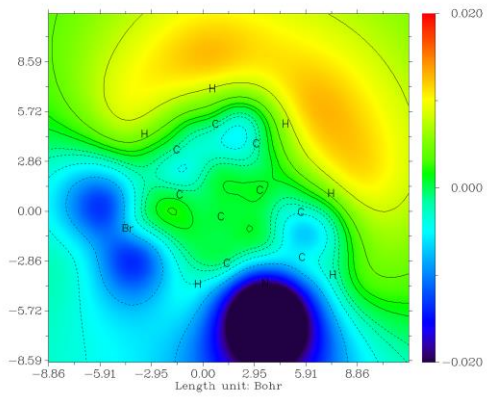

1o

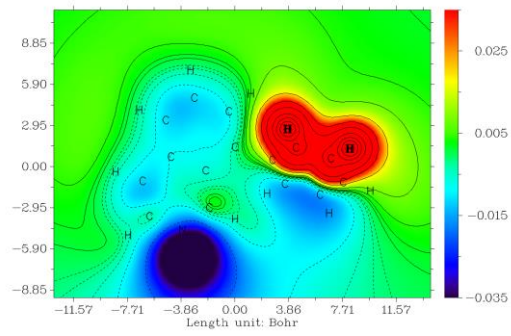

1p

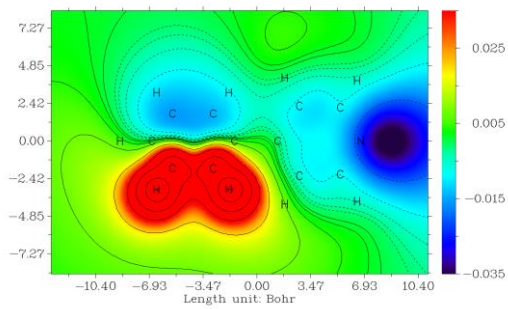

1q

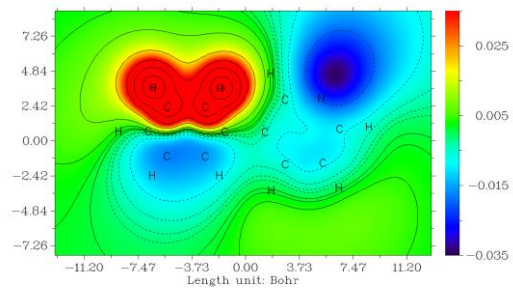

1r

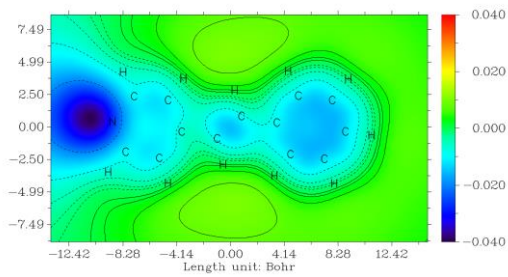

1s

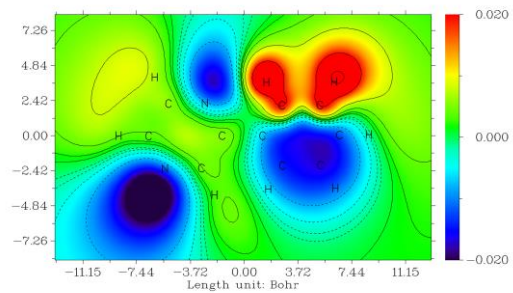

1t

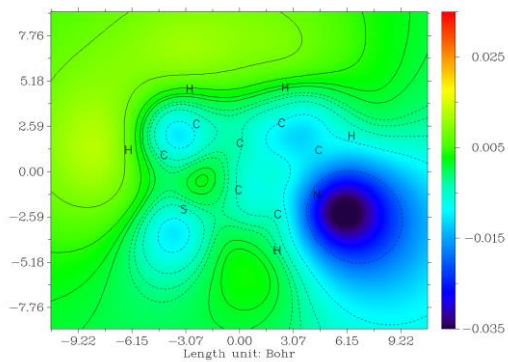

1u

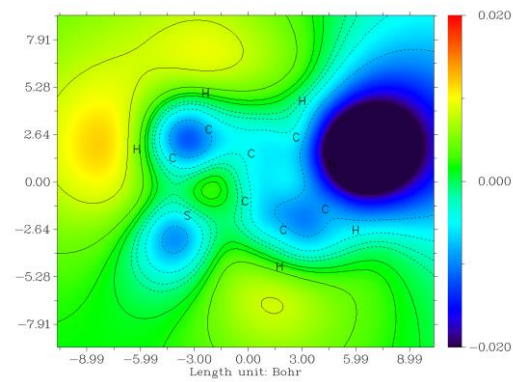

1v

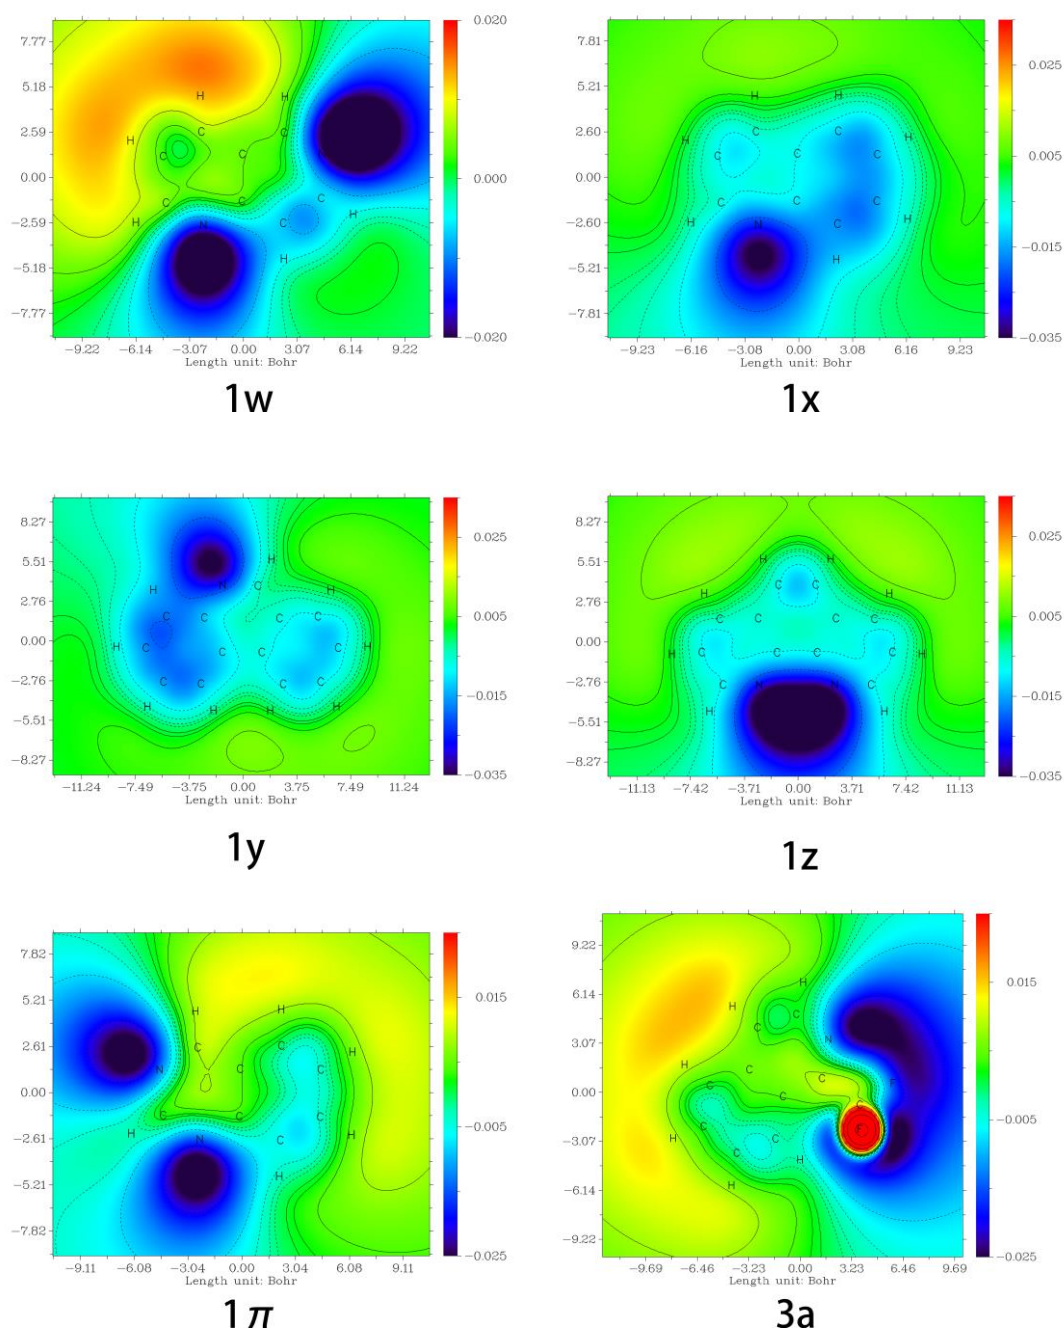

#### 4) NPA charges for prediction of products<sup>14</sup>

Population analysis was carried out on the basis of optimized structure with NBO 3.1 in Gaussian 16 program. The population analysis was performed on the  $N$  electron system, which values are per atom charge density. And these population values equivalent to their atomic partial charges. For example, the value of +0.10 in isoquinoline indicates a partial positive charge of 10% of a proton's charge, whereas the value of -0.22 indicates a partial negative charge of 22% of an electron's charge.



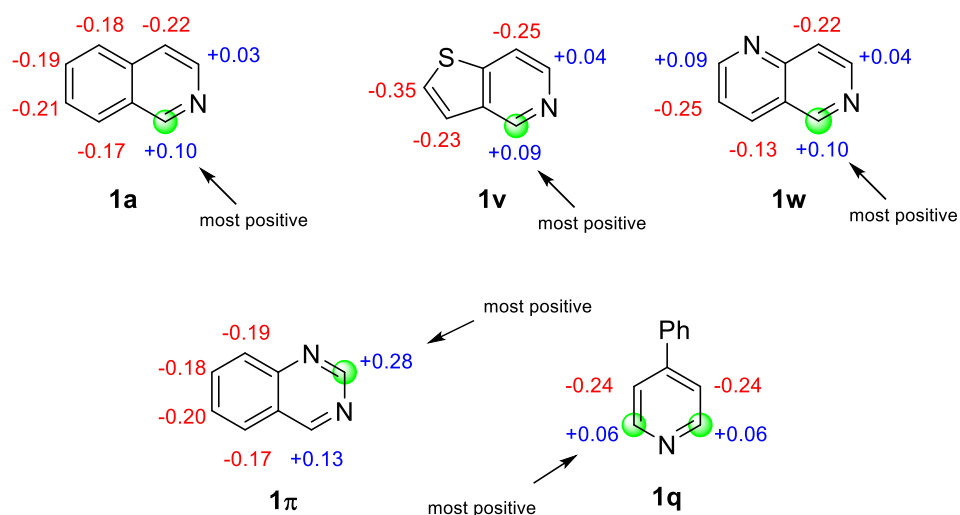

**Figure S3.** Partial charges distribution of *N*-heteroarenes.

We tried to conduct density functional theory (DFT) calculations to support our hypothesis for the high selective C-H trifluoromethylation of these electron-deficient substrates. The population analysis was performed on the *N* electron system, which values are per atom charge density. And these population values equivalent to their atomic partial charges. For example, the value of +0.10 in isoquinoline indicates a partial positive charge of 10% of a proton's charge, whereas the value of -0.22 indicates a partial negative charge of 22% of an electron's charge (Figure S1).

As with our calculated results in these electron-deficient heteroarenes, the most positive site of isoquinolines and pyridines are consistent with the regioselectivity observed in reaction. Therefore, the positive site identified on less electron rich *N*-heteroarenes via the partial charge analysis that are most reactive position toward attack by nucleophilic  $\text{CF}_3$  radicals. All substrates (**1a-1π**) were computed and the regioselectivity of experimental observations that closely fits with partial charges distribution.

### Population Analysis for **1a-1π**

**Atom:** the corresponding atom in the numbering molecule;

$\rho(N)$ : the natural population for the *N* electron system calculated by NBO;

$\delta(N)$ : the partial charge  $\delta(N)$  of every atom in the molecule with *N* electrons was calculated by subtracting  $\rho(N)$  from the normal electron count of corresponding atom.

| 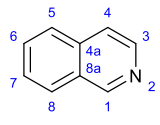<br>1a |           |             | <br>1q |           |             |
|-----------------------------------------------------------------------------------------|-----------|-------------|-------------------------------------------------------------------------------------------|-----------|-------------|
| Atom                                                                                    | $\rho(N)$ | $\delta(N)$ | Atom                                                                                      | $\rho(N)$ | $\delta(N)$ |
| 1                                                                                       | 5.90030   | 0.09970     | 1                                                                                         | 7.45518   | -0.45518    |
| 2                                                                                       | 7.45351   | -0.45351    | 2                                                                                         | 5.94341   | 0.05659     |
| 3                                                                                       | 5.96847   | 0.03153     | 3                                                                                         | 6.23510   | -0.23510    |
| 4                                                                                       | 6.21894   | -0.21894    | 4                                                                                         | 6.01326   | -0.01326    |
| 4a                                                                                      | 6.04109   | -0.04109    | 5                                                                                         | 6.23510   | -0.23510    |
| 5                                                                                       | 6.18410   | -0.18410    | 6                                                                                         | 5.94341   | 0.05659     |
| 6                                                                                       | 6.18522   | -0.18522    | 1'                                                                                        | 6.06307   | -0.06307    |
| 7                                                                                       | 6.10248   | -0.20535    | 2'                                                                                        | 6.18524   | -0.18524    |
| 8                                                                                       | 6.16572   | -0.16572    | 3'                                                                                        | 6.19666   | -0.19666    |
| 8a                                                                                      | 6.10248   | -0.10248    | 4'                                                                                        | 6.19877   | -0.19877    |
|                                                                                         |           |             | 5'                                                                                        | -0.19666  | -0.19666    |
|                                                                                         |           |             | 6'                                                                                        | -0.18524  | -0.18524    |

| 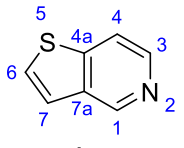<br>1v |           |             | <br>1w |           |             |
|-------------------------------------------------------------------------------------------|-----------|-------------|--------------------------------------------------------------------------------------------|-----------|-------------|
| Atom                                                                                      | $\rho(N)$ | $\delta(N)$ | Atom                                                                                       | $\rho(N)$ | $\delta(N)$ |
| 1                                                                                         | 5.91404   | 0.08596     | 1                                                                                          | 5.90158   | 0.09842     |
| 2                                                                                         | 7.45763   | -0.45763    | 2                                                                                          | 7.44892   | -0.44892    |
| 3                                                                                         | 5.95712   | 0.04288     | 3                                                                                          | 5.96157   | 0.03843     |
| 4                                                                                         | 6.25227   | -0.25227    | 4                                                                                          | 5.81700   | -0.22321    |
| 4a                                                                                        | 6.16230   | -0.16230    | 4a                                                                                         | 6.13661   | 0.18300     |

|    |          |          |    |         |          |
|----|----------|----------|----|---------|----------|
| 5  | 15.59713 | 0.40287  | 5  | 7.44564 | -0.18410 |
| 6  | 6.35064  | -0.35064 | 6  | 5.91260 | 0.08740  |
| 7  | 6.23483  | -0.23483 | 7  | 6.25004 | -0.25004 |
| 7a | 6.13339  | -0.13339 | 8  | 6.12837 | -0.12837 |
|    |          |          | 8a | 6.13661 | -0.13661 |

| 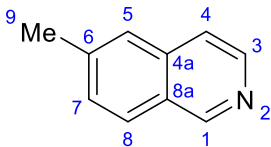 <p style="text-align: center;"><b>1b</b></p> |           |             |  <p style="text-align: center;"><b>1c</b></p> |           |             |
|--------------------------------------------------------------------------------------------------------------------------------|-----------|-------------|---------------------------------------------------------------------------------------------------------------------------------|-----------|-------------|
| Atom                                                                                                                           | $\rho(N)$ | $\delta(N)$ | Atom                                                                                                                            | $\rho(N)$ | $\delta(N)$ |
| 1                                                                                                                              | 5.90100   | 0.09900     | 1                                                                                                                               | 5.89622   | 0.10378     |
| 2                                                                                                                              | 7.45763   | -0.45763    | 2                                                                                                                               | 7.46509   | -0.46509    |
| 3                                                                                                                              | 5.96767   | 0.03233     | 3                                                                                                                               | 5.96605   | 0.03395     |
| 4                                                                                                                              | 6.22109   | -0.22109    | 4                                                                                                                               | 6.22683   | -0.22683    |
| 4a                                                                                                                             | 6.03135   | -0.03135    | 4a                                                                                                                              | 6.23590   | -0.23590    |
| 5                                                                                                                              | 6.19188   | -0.19188    | 5                                                                                                                               | 6.02489   | -0.02489    |
| 6                                                                                                                              | 6.01148   | -0.01148    | 6                                                                                                                               | 6.23590   | -0.23590    |
| 7                                                                                                                              | 6.20263   | -0.20263    | 7                                                                                                                               | 5.66000   | 0.34000     |
| 8                                                                                                                              | 6.15842   | -0.15842    | 8                                                                                                                               | 6.27812   | -0.27812    |
| 8a                                                                                                                             | 6.10735   | -0.10735    | 8a                                                                                                                              | 6.14472   | -0.14472    |
| 9                                                                                                                              | 6.59051   | -0.59051    | 4a                                                                                                                              | 6.12285   | -0.12285    |
|                                                                                                                                |           |             | 9                                                                                                                               | 8.53697   | -0.53697    |
|                                                                                                                                |           |             | 10                                                                                                                              | 6.20893   | -0.20893    |

|                                                                                                                                  |  |  |                                                                                                                                   |  |  |
|----------------------------------------------------------------------------------------------------------------------------------|--|--|-----------------------------------------------------------------------------------------------------------------------------------|--|--|
| 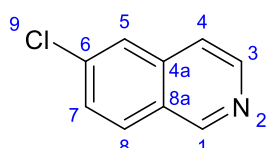 <p style="text-align: center;"><b>1d</b></p> |  |  |  <p style="text-align: center;"><b>1e</b></p> |  |  |
|----------------------------------------------------------------------------------------------------------------------------------|--|--|-----------------------------------------------------------------------------------------------------------------------------------|--|--|

| Atom | $\rho(N)$ | $\delta(N)$ | Atom | $\rho(N)$ | $\delta(N)$ |
|------|-----------|-------------|------|-----------|-------------|
| 1    | 5.89773   | 0.10227     | 1    | 5.90278   | 0.09722     |
| 2    | 7.45165   | -0.45165    | 2    | 7.44422   | -0.44422    |
| 3    | 5.96206   | 0.03794     | 3    | 5.96866   | 0.03134     |
| 4    | 6.22006   | -0.22006    | 4    | 6.20905   | -0.20905    |
| 4a   | 6.02689   | -0.02689    | 4a   | 6.05200   | -0.05200    |
| 5    | 6.21255   | -0.21255    | 5    | 6.11456   | -0.11456    |
| 6    | 6.02219   | -0.02219    | 6    | 6.14769   | -0.14769    |
| 7    | 6.22586   | -0.22586    | 7    | 6.17500   | -0.17500    |
| 8    | 6.14827   | -0.14827    | 8    | 6.16661   | -0.16661    |
| 8a   | 6.10619   | -0.10619    | 8a   | 6.08882   | -0.08882    |
| 9    | 16.98845  | 0.01155     | 9    | 5.20246   | 0.79754     |
|      |           |             | 9a   | 8.59691   | -0.59691    |
|      |           |             | 10   | 6.21341   | -0.21341    |

| <p style="text-align: center;"><b>1f</b></p> |           |             | <p style="text-align: center;"><b>1g</b></p> |           |             |
|----------------------------------------------|-----------|-------------|----------------------------------------------|-----------|-------------|
| Atom                                         | $\rho(N)$ | $\delta(N)$ | Atom                                         | $\rho(N)$ | $\delta(N)$ |
| 1                                            | 5.90236   | 0.09764     | 1                                            | 5.89748   | 0.10252     |
| 2                                            | 7.45236   | -0.45236    | 2                                            | 7.44830   | -0.44830    |
| 3                                            | 5.96714   | 0.03286     | 3                                            | 5.95397   | 0.04603     |
| 4                                            | 6.21723   | -0.21723    | 4                                            | 6.22953   | -0.22953    |
| 4a                                           | 6.04632   | -0.04632    | 4a                                           | 6.01377   | -0.01377    |
| 5                                            | 6.13425   | -0.13425    | 5                                            | 6.15538   | -0.15538    |
| 6                                            | 6.13654   | -0.13654    | 6                                            | 6.11801   | -0.11801    |

|    |         |          |    |         |          |
|----|---------|----------|----|---------|----------|
| 7  | 6.16953 | -0.16953 | 7  | 6.20911 | -0.20911 |
| 8  | 6.16408 | -0.16408 | 8  | 6.13667 | -0.13667 |
| 8a | 6.09918 | -0.09918 | 8a | 6.09248 | -0.09248 |
| 9  | 5.91376 | 0.08624  | 9  | 5.58486 | 0.41514  |
| 10 | 6.01913 | -0.01913 | 10 | 8.52986 | -0.52986 |
| 1' | 6.14697 | -0.14697 |    |         |          |
| 2' | 6.14715 | -0.14715 |    |         |          |
| 3' | 6.21068 | -0.21068 |    |         |          |
| 4' | 6.19365 | -0.19365 |    |         |          |
| 5' | 6.21067 | -0.21067 |    |         |          |
| 6' | 6.14724 | -0.14724 |    |         |          |

| 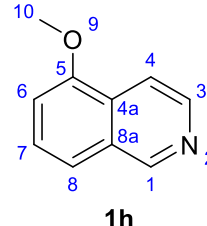 <p style="text-align: center;"><b>1h</b></p> |           |             |  <p style="text-align: center;"><b>1j</b></p> |           |             |
|---------------------------------------------------------------------------------------------------------------------------------|-----------|-------------|----------------------------------------------------------------------------------------------------------------------------------|-----------|-------------|
| Atom                                                                                                                            | $\rho(N)$ | $\delta(N)$ | Atom                                                                                                                             | $\rho(N)$ | $\delta(N)$ |
| 1                                                                                                                               | 5.90419   | 0.09581     | 1                                                                                                                                | 5.91354   | 0.08646     |
| 2                                                                                                                               | 7.45184   | -0.45184    | 2                                                                                                                                | 7.46205   | -0.46205    |
| 3                                                                                                                               | 5.96996   | 0.03004     | 3                                                                                                                                | 5.97447   | 0.02553     |
| 4                                                                                                                               | 6.21466   | -0.21466    | 4                                                                                                                                | 6.22715   | -0.22715    |
| 4a                                                                                                                              | 6.06937   | -0.06937    | 4a                                                                                                                               | 6.03557   | -0.03557    |
| 5                                                                                                                               | 5.65258   | 0.34742     | 5                                                                                                                                | 6.28203   | -0.28203    |
| 6                                                                                                                               | 6.28912   | -0.28912    | 6                                                                                                                                | 5.67573   | 0.32427     |
| 7                                                                                                                               | 6.18433   | -0.18433    | 7                                                                                                                                | 5.69692   | 0.30308     |
| 8                                                                                                                               | 6.20031   | -0.20031    | 8                                                                                                                                | 6.25641   | -0.25641    |
| 8a                                                                                                                              | 6.08972   | -0.08972    | 8a                                                                                                                               | 6.10277   | -0.10277    |
| 9                                                                                                                               | 8.53922   | -0.53922    | 9                                                                                                                                | 8.51829   | -0.51829    |
| 10                                                                                                                              | 6.20722   | -0.20722    | 10                                                                                                                               | 8.52201   | -0.52201    |

|  |  |  |    |         |          |
|--|--|--|----|---------|----------|
|  |  |  | 11 | 6.20892 | -0.20892 |
|  |  |  | 12 | 6.20851 | -0.20851 |

| 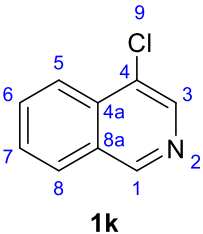 <p style="text-align: center;"><b>1k</b></p> |           |             |  <p style="text-align: center;"><b>1l</b></p> |           |             |
|--------------------------------------------------------------------------------------------------------------------------------|-----------|-------------|---------------------------------------------------------------------------------------------------------------------------------|-----------|-------------|
| Atom                                                                                                                           | $\rho(N)$ | $\delta(N)$ | Atom                                                                                                                            | $\rho(N)$ | $\delta(N)$ |
| 1                                                                                                                              | 5.90321   | 0.09679     | 1                                                                                                                               | 5.90151   | 0.09849     |
| 2                                                                                                                              | 7.43854   | -0.43854    | 2                                                                                                                               | 7.43825   | -1.43825    |
| 3                                                                                                                              | 5.98866   | 0.01134     | 3                                                                                                                               | 5.98953   | 0.01047     |
| 4                                                                                                                              | 6.04988   | -0.04988    | 4                                                                                                                               | 6.11318   | -0.11318    |
| 4a                                                                                                                             | 6.06780   | -0.06780    | 4a                                                                                                                              | 6.07168   | -0.07168    |
| 5                                                                                                                              | 6.18510   | -0.18510    | 5                                                                                                                               | 6.18429   | -0.18429    |
| 6                                                                                                                              | 6.17651   | -0.17651    | 6                                                                                                                               | 6.17594   | -0.17594    |
| 7                                                                                                                              | 6.20048   | -0.20048    | 7                                                                                                                               | 6.20027   | -0.20027    |
| 8                                                                                                                              | 6.16370   | -0.16370    | 8                                                                                                                               | 6.16378   | -0.16378    |
| 8a                                                                                                                             | 6.09013   | -0.09013    | 8a                                                                                                                              | 6.08944   | -0.08944    |
| 9                                                                                                                              | 16.99133  | 0.00867     | 9                                                                                                                               | 34.92886  | 0.07114     |

| 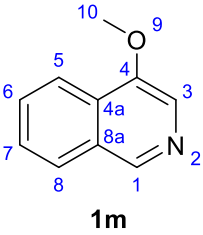 <p style="text-align: center;"><b>1m</b></p> |           |             |  <p style="text-align: center;"><b>1n</b></p> |           |             |
|----------------------------------------------------------------------------------------------------------------------------------|-----------|-------------|-----------------------------------------------------------------------------------------------------------------------------------|-----------|-------------|
| Atom                                                                                                                             | $\rho(N)$ | $\delta(N)$ | Atom                                                                                                                              | $\rho(N)$ | $\delta(N)$ |
| 1                                                                                                                                | 5.92859   | 0.07141     | 1                                                                                                                                 | 5.90690   | 0.09310     |
| 2                                                                                                                                | 7.43851   | -0.43851    | 2                                                                                                                                 | 7.44797   | -0.44797    |
| 3                                                                                                                                | 6.06732   | -0.06732    | 3                                                                                                                                 | 5.95229   | 0.04771     |

|    |         |          |    |         |          |
|----|---------|----------|----|---------|----------|
| 4  | 5.68477 | 0.31523  | 4  | 6.06670 | -0.06670 |
| 4a | 6.07128 | -0.07128 | 4a | 6.02412 | -0.02412 |
| 5  | 6.17994 | -0.17994 | 5  | 6.19263 | -0.19263 |
| 6  | 6.18809 | -0.18809 | 6  | 6.18347 | -0.18347 |
| 7  | 6.20284 | -0.20284 | 7  | 6.20450 | -0.20450 |
| 8  | 6.16867 | -0.16867 | 8  | 6.17132 | -0.17132 |
| 8a | 6.09095 | -0.09095 | 8a | 6.08567 | -0.08567 |
| 9  | 8.54047 | -0.54047 | 1' | 6.05553 | -0.05553 |
| 10 | 6.20708 | -0.20708 | 2' | 6.18947 | -0.18947 |
|    |         |          | 3' | 6.19725 | -0.19725 |
|    |         |          | 4' | 6.20341 | -0.20341 |
|    |         |          | 5' | 6.19929 | -0.19929 |
|    |         |          | 6' | 6.19342 | -0.19342 |

| 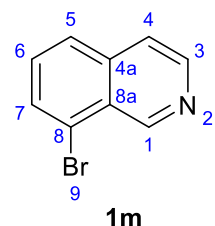 <p style="text-align: center;"><b>1m</b></p> |           |             |  <p style="text-align: center;"><b>1p</b></p> |           |             |
|----------------------------------------------------------------------------------------------------------------------------------|-----------|-------------|-----------------------------------------------------------------------------------------------------------------------------------|-----------|-------------|
| Atom                                                                                                                             | $\rho(N)$ | $\delta(N)$ | Atom                                                                                                                              | $\rho(N)$ | $\delta(N)$ |
| 1                                                                                                                                | 5.89955   | 0.10045     | 1                                                                                                                                 | 5.90442   | 0.09558     |
| 2                                                                                                                                | 7.44503   | -0.44503    | 2                                                                                                                                 | 7.45340   | -0.45340    |
| 3                                                                                                                                | 5.96303   | 0.03697     | 3                                                                                                                                 | 5.96712   | 0.03288     |
| 4                                                                                                                                | 6.21682   | -0.21682    | 4                                                                                                                                 | 6.21899   | -0.21899    |
| 4a                                                                                                                               | 6.02777   | -0.02777    | 4a                                                                                                                                | 6.03676   | -0.03676    |
| 5                                                                                                                                | 6.18334   | -0.18334    | 5                                                                                                                                 | 6.18595   | -0.18595    |
| 6                                                                                                                                | 6.17404   | -0.17404    | 6                                                                                                                                 | 6.18001   | -0.18001    |
| 7                                                                                                                                | 6.22894   | -0.22894    | 7                                                                                                                                 | 6.19303   | -0.19303    |
| 8                                                                                                                                | 6.06253   | -0.06253    | 8                                                                                                                                 | 5.96712   | 0.03288     |

|    |          |          |    |         |          |
|----|----------|----------|----|---------|----------|
| 8a | 6.13469  | -0.13469 | 8a | 6.09241 | -0.09241 |
| 9  | 34.92659 | 0.07341  | 1' | 6.05781 | -0.05781 |
|    |          |          | 2' | 6.19200 | -0.19200 |
|    |          |          | 3' | 6.19760 | -0.19760 |
|    |          |          | 4' | 6.20224 | -0.20224 |
|    |          |          | 5' | 6.19717 | -0.19717 |
|    |          |          | 6' | 6.19069 | -0.19069 |

| 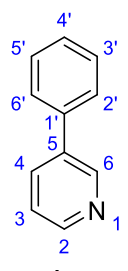 <p style="text-align: center;"><b>1r</b></p> |           |             |  <p style="text-align: center;"><b>1t</b></p> |           |             |
|--------------------------------------------------------------------------------------------------------------------------------|-----------|-------------|----------------------------------------------------------------------------------------------------------------------------------|-----------|-------------|
| Atom                                                                                                                           | $\rho(N)$ | $\delta(N)$ | Atom                                                                                                                             | $\rho(N)$ | $\delta(N)$ |
| 1                                                                                                                              | 7.44753   | -0.44753    | 1                                                                                                                                | 7.42834   | -0.42834    |
| 2                                                                                                                              | 5.95271   | 0.04729     | 2                                                                                                                                | 5.83179   | 0.16821     |
| 3                                                                                                                              | 6.23845   | -0.23845    | 3                                                                                                                                | 5.96692   | 0.03308     |
| 4                                                                                                                              | 6.15731   | -0.15731    | 4                                                                                                                                | 7.41172   | -0.41172    |
| 5                                                                                                                              | 6.08656   | -0.08656    | 5                                                                                                                                | 5.99717   | 0.00283     |
| 6                                                                                                                              | 5.93186   | 0.06814     | 6                                                                                                                                | 5.97618   | 0.02382     |
| 1'                                                                                                                             | 6.05731   | -0.05731    | 1'                                                                                                                               | 6.08274   | -0.08274    |
| 2'                                                                                                                             | 6.18884   | -0.18884    | 2'                                                                                                                               | 6.18373   | -0.18373    |
| 3'                                                                                                                             | 6.19621   | -0.19621    | 3'                                                                                                                               | 6.20116   | -0.20116    |
| 4'                                                                                                                             | 6.20255   | -0.20255    | 4'                                                                                                                               | 6.19351   | -0.19351    |
| 5'                                                                                                                             | 6.19682   | -0.19682    | 5'                                                                                                                               | 6.19890   | -0.19890    |
| 6'                                                                                                                             | 6.19033   | -0.19033    | 6'                                                                                                                               | 6.16847   | -0.16847    |



| 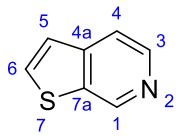<br><b>1u</b> |           |             | <br><b>1π</b> |           |             |
|------------------------------------------------------------------------------------------------|-----------|-------------|-------------------------------------------------------------------------------------------------|-----------|-------------|
| Atom                                                                                           | $\rho(N)$ | $\delta(N)$ | Atom                                                                                            | $\rho(N)$ | $\delta(N)$ |
| 1                                                                                              | 5.94691   | 0.05309     | 1                                                                                               | 7.46438   | -0.46438    |
| 2                                                                                              | 7.45208   | -0.45208    | 2                                                                                               | 5.72317   | 0.27683     |
| 3                                                                                              | 5.96452   | 0.03548     | 3                                                                                               | 7.47978   | -0.47978    |
| 4                                                                                              | 6.22198   | -0.22198    | 4                                                                                               | 5.86913   | 0.13087     |
| 4a                                                                                             | 6.06851   | -0.06851    | 4a                                                                                              | 6.13608   | -0.13608    |
| 5                                                                                              | 6.24644   | -0.24644    | 5                                                                                               | 6.16783   | -0.16783    |
| 6                                                                                              | 6.33960   | -0.33960    | 6                                                                                               | 6.20043   | -0.20043    |
| 7                                                                                              | 15.59343  | 0.40657     | 7                                                                                               | 6.17785   | -0.17785    |
| 7a                                                                                             | 6.22406   | -0.22406    | 8                                                                                               | 6.18928   | -0.18928    |
|                                                                                                |           |             | 8a                                                                                              | 5.81890   | 0.18110     |

| 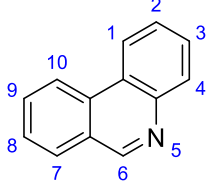<br><b>3y</b> |           |             | <br><b>3z</b> |           |             |
|--------------------------------------------------------------------------------------------------|-----------|-------------|---------------------------------------------------------------------------------------------------|-----------|-------------|
| Atom                                                                                             | $\rho(N)$ | $\delta(N)$ | Atom                                                                                              | $\rho(N)$ | $\delta(N)$ |
| 1                                                                                                | 6.18638   | -0.18638    | 1                                                                                                 | 7.41513   | -0.41513    |
| 2                                                                                                | 6.19371   | -0.19371    | 2                                                                                                 | 5.93152   | 0.06848     |
| 3                                                                                                | 6.20018   | -0.20018    | 3                                                                                                 | 6.24004   | -0.24004    |
| 4                                                                                                | 6.17897   | -0.17897    | 4                                                                                                 | 6.14608   | -0.14608    |
| 5                                                                                                | 7.44619   | -0.44619    | 5                                                                                                 | 6.17525   | -0.17525    |
| 6                                                                                                | 5.87413   | 0.12587     | 6                                                                                                 | 6.17462   | -0.17462    |
| 7                                                                                                | 6.15246   | -0.15246    | 7                                                                                                 | 6.14602   | -0.14602    |
| 8                                                                                                | 6.21332   | -0.21332    | 8                                                                                                 | 6.24003   | -0.24003    |

|    |         |          |    |         |          |
|----|---------|----------|----|---------|----------|
| 9  | 6.18033 | -0.18033 | 9  | 5.93160 | 0.06840  |
| 10 | 6.18463 | -0.18463 | 10 | 7.41651 | -0.41651 |

### Cartesian coordinates for the optimized structures

|           |             |             |             |           |             |             |             |
|-----------|-------------|-------------|-------------|-----------|-------------|-------------|-------------|
| <b>1a</b> |             |             |             | C         | -2.70129981 | -0.96360565 | 0.00000010  |
| C         | -1.26737808 | -1.35866773 | -0.00000015 | H         | 0.31203035  | 2.74494950  | -0.00000027 |
| C         | -0.00843699 | -0.69843430 | -0.00000005 | H         | -2.15672677 | 2.25558561  | 0.00000063  |
| C         | -0.00995714 | 0.72728619  | 0.00000005  | C         | 0.51196087  | 1.67834006  | -0.00000012 |
| C         | -1.27146137 | 1.37378550  | 0.00000007  | C         | 1.03278771  | -1.07522959 | 0.00000003  |
| C         | -2.41774306 | 0.61788459  | 0.00000000  | H         | -1.29176899 | -2.57097252 | -0.00000008 |
| H         | 1.21573165  | -2.48276411 | -0.00000013 | H         | -3.57282793 | -1.61054415 | 0.00000031  |
| H         | -1.29020911 | -2.44725695 | -0.00000019 | C         | 2.08361819  | -0.18413577 | 0.00000029  |
| C         | 1.22451463  | -1.39775057 | -0.00000005 | C         | 1.80198283  | 1.21188781  | 0.00000000  |
| C         | 1.23197216  | 1.41347333  | 0.00000012  | H         | 1.22756719  | -2.14327617 | -0.00000000 |
| H         | -1.32810763 | 2.45688295  | 0.00000014  | H         | 2.62979700  | 1.91379555  | -0.00000015 |
| H         | -3.39397250 | 1.09198532  | 0.00000000  | N         | -2.96335250 | 0.37117622  | 0.00000003  |
| C         | 2.41305176  | 0.70980910  | 0.00000011  | C         | 3.51704783  | -0.65166731 | 0.00000001  |
| C         | 2.41236002  | -0.70649343 | 0.00000002  | H         | 4.05085965  | -0.28028653 | -0.88054185 |
| H         | 1.23638025  | 2.49822341  | 0.00000019  | H         | 4.05085953  | -0.28028701 | 0.88054218  |
| H         | 3.35520889  | -1.24125709 | 0.00000000  | H         | 3.58263016  | -1.74103499 | -0.00000033 |
| N         | -2.42786576 | -0.74312417 | -0.00000011 |           |             |             |             |
| H         | 3.35849720  | 1.24069942  | 0.00000016  | <b>1c</b> |             |             |             |
|           |             |             |             | C         | 2.31005743  | 1.22871681  | -0.00000011 |
| <b>1b</b> |             |             |             | C         | 0.96710153  | 0.76675689  | -0.00000000 |
| C         | -1.93435052 | 1.18965880  | 0.00000006  | C         | 0.74347381  | -0.64319562 | 0.00000005  |
| C         | -0.57782009 | 0.77114701  | -0.00000011 | C         | 1.89657112  | -1.47321196 | 0.00000011  |
| C         | -0.31405162 | -0.62830138 | -0.00000022 | C         | 3.14232397  | -0.89900502 | 0.00000012  |
| C         | -1.43470082 | -1.49578778 | -0.00000015 | H         | 0.01875329  | 2.70899220  | -0.00000014 |

|           |             |             |             |           |             |             |             |
|-----------|-------------|-------------|-------------|-----------|-------------|-------------|-------------|
| H         | 2.49620037  | 2.30181376  | 0.00000008  | C         | -1.36473278 | 1.38156889  | -0.00027451 |
| C         | -0.14674035 | 1.63661641  | 0.00000000  | H         | -1.00570694 | -2.01948031 | 0.00038438  |
| C         | -0.57812696 | -1.13417574 | -0.00000012 | H         | -2.15796897 | 2.11776877  | -0.00042107 |
| H         | 1.79009439  | -2.55237237 | 0.00000025  | N         | 3.34091839  | 0.24064736  | -0.00002744 |
| H         | 4.03420032  | -1.51760688 | 0.00000018  | Cl        | -3.38917692 | -0.44565231 | 0.00006686  |
| C         | -1.64910517 | -0.25999995 | -0.00000001 |           |             |             |             |
| C         | -1.43073823 | 1.14323161  | 0.00000006  | <b>1e</b> |             |             |             |
| H         | -0.77048092 | -2.20064205 | -0.00000052 | C         | 3.08371454  | 1.14632587  | 0.00000005  |
| H         | -2.26671979 | 1.82924831  | -0.00000000 | C         | 1.70326963  | 0.80703091  | 0.00000020  |
| N         | 3.36464322  | 0.44585691  | -0.00000005 | C         | 1.36446620  | -0.57725583 | -0.00000008 |
| O         | -2.88864312 | -0.82464277 | -0.00000026 | C         | 2.43202263  | -1.51030971 | -0.00000049 |
| C         | -4.03834731 | 0.01416959  | 0.00000011  | C         | 3.72595735  | -1.05116901 | -0.00000055 |
| H         | -4.07561847 | 0.64365446  | -0.89510293 | H         | 0.93632991  | 2.83055592  | 0.00000077  |
| H         | -4.89298855 | -0.66001735 | 0.00000167  | H         | 3.36857754  | 2.19697581  | 0.00000035  |
| H         | -4.07561718 | 0.64365552  | 0.89510269  | C         | 0.67109559  | 1.77864270  | 0.00000058  |
|           |             |             |             | C         | -0.00133808 | -0.94791516 | 0.00000004  |
| <b>1d</b> |             |             |             | H         | 2.22460426  | -2.57453332 | -0.00000075 |
| C         | 2.36452497  | 1.11963956  | -0.00020374 | H         | 4.56061097  | -1.74447892 | -0.00000089 |
| C         | 0.98451131  | 0.78302075  | -0.00014588 | C         | -0.98841328 | 0.01555049  | 0.00000040  |
| C         | 0.63954527  | -0.59957956 | 0.00011924  | C         | -0.64660808 | 1.39538558  | 0.00000065  |
| C         | 1.70545704  | -1.53384640 | 0.00030614  | H         | -0.28377099 | -1.99415750 | -0.00000021 |
| C         | 3.00044653  | -1.07660736 | 0.00022570  | H         | -1.43692466 | 2.13354420  | 0.00000090  |
| H         | 0.22079449  | 2.80932909  | -0.00054126 | N         | 4.06056808  | 0.26818143  | -0.00000027 |
| H         | 2.65022950  | 2.17011599  | -0.00040381 | C         | -2.40942933 | -0.44627982 | 0.00000040  |
| C         | -0.04427323 | 1.75746806  | -0.00033951 | O         | -2.75356359 | -1.60573903 | 0.00000162  |
| C         | -0.72881938 | -0.97255317 | 0.00018353  | O         | -3.28213799 | 0.58278592  | -0.00000117 |
| H         | 1.49838654  | -2.59813392 | 0.00051068  | C         | -4.67675378 | 0.22464346  | -0.00000100 |
| H         | 3.83218993  | -1.77361949 | 0.00036500  | H         | -5.21768500 | 1.16823187  | -0.00000263 |
| C         | -1.69138400 | 0.00515216  | -0.00001069 | H         | -4.91900285 | -0.35884133 | -0.88905527 |

|           |             |             |             |           |             |             |             |
|-----------|-------------|-------------|-------------|-----------|-------------|-------------|-------------|
| H         | -4.91900339 | -0.35883857 | 0.88905493  | H         | -7.26155754 | -0.40187203 | 0.00000000  |
|           |             |             |             | H         | -5.81615344 | -2.41942217 | -0.00000100 |
| <b>1f</b> |             |             |             | H         | -3.35300124 | -2.18175216 | -0.00000100 |
| C         | 4.86135235  | 0.82981806  | 0.00000000  |           |             |             |             |
| C         | 3.44639325  | 0.71644905  | 0.00000000  | <b>1g</b> |             |             |             |
| C         | 2.88539321  | -0.59405804 | 0.00000000  | C         | 2.40770852  | 0.63997664  | 0.00000025  |
| C         | 3.79162927  | -1.68541012 | 0.00000000  | C         | 0.99733309  | 0.81979755  | 0.00000006  |
| C         | 5.14264737  | -1.43996710 | 0.00000000  | C         | 0.16658358  | -0.34282406 | -0.00000022 |
| H         | 3.01214322  | 2.83752020  | -0.00000100 | C         | 0.83830795  | -1.59365788 | -0.00000037 |
| H         | 5.31004239  | 1.82178113  | 0.00000000  | C         | 2.21195265  | -1.62981388 | -0.00000012 |
| C         | 2.58237719  | 1.84130013  | 0.00000000  | H         | 1.06771611  | 2.97766165  | 0.00000034  |
| C         | 1.47919411  | -0.74302006 | 0.00000000  | H         | 3.04725156  | 1.52095229  | 0.00000058  |
| H         | 3.41814025  | -2.70348419 | 0.00000100  | C         | 0.41616407  | 2.10996263  | 0.00000009  |
| H         | 5.85365644  | -2.25987116 | 0.00000100  | C         | -1.25452127 | -0.15862611 | -0.00000039 |
| C         | 0.64670705  | 0.36708503  | 0.00000000  | H         | 0.29292178  | -2.52752732 | -0.00000068 |
| C         | 1.22266409  | 1.67609512  | 0.00000000  | H         | 2.73351634  | -2.58147339 | -0.00000005 |
| H         | 1.04822608  | -1.73741213 | 0.00000000  | C         | -0.95202057 | 2.26043492  | -0.00000018 |
| H         | 0.56176004  | 2.53403218  | -0.00000100 | H         | -1.39585655 | 3.24888747  | -0.00000015 |
| N         | 5.68732740  | -0.19301601 | 0.00000000  | N         | 3.00669347  | -0.52743390 | 0.00000045  |
| C         | -0.76752505 | 0.22051002  | 0.00000000  | C         | -1.77928724 | 1.12347601  | -0.00000039 |
| C         | -1.97341414 | 0.10899401  | 0.00000000  | H         | -2.85813321 | 1.22881166  | -0.00000057 |
| C         | -3.38976625 | -0.02770000 | 0.00000000  | C         | -2.20259055 | -1.30015749 | -0.00000030 |
| C         | -4.21888430 | 1.10935508  | 0.00000000  | O         | -3.40946215 | -1.17947501 | 0.00000104  |
| C         | -3.98579529 | -1.30250010 | -0.00000100 | H         | -1.75635448 | -2.31088497 | -0.00000162 |
| H         | -3.76628127 | 2.09357515  | 0.00000100  |           |             |             |             |
| C         | -5.60200440 | 0.97090707  | 0.00000000  | <b>1h</b> |             |             |             |
| C         | -5.36984937 | -1.43144210 | -0.00000100 | C         | 0.37368884  | 2.53911098  | 0.07633228  |
| H         | -6.22923645 | 1.85514013  | 0.00000100  | C         | -0.94623144 | 2.15718558  | 0.06789978  |
| C         | -6.18262244 | -0.29760302 | 0.00000000  | C         | -1.30042845 | 0.78807387  | 0.02120761  |

|           |             |             |             |           |             |             |             |
|-----------|-------------|-------------|-------------|-----------|-------------|-------------|-------------|
| C         | -0.29619093 | -0.23103708 | 0.00315539  | C         | -0.80105681 | 2.30731084  | -0.00000024 |
| C         | 1.05806590  | 0.22133289  | 0.01714223  | H         | -1.22417109 | 3.30540082  | -0.00000024 |
| C         | 1.38254669  | 1.55886867  | 0.03859455  | N         | 3.03319405  | -0.63358940 | 0.00000075  |
| H         | -3.43413722 | 1.15405131  | -0.00012013 | C         | -1.68219085 | 1.19750340  | -0.00000082 |
| H         | 0.64883563  | 3.58586944  | 0.11070622  | H         | -2.74859053 | 1.37800794  | -0.00000143 |
| H         | -1.73631865 | 2.90000764  | 0.09287860  | O         | -1.94288267 | -1.21800859 | -0.00000145 |
| C         | -2.66380626 | 0.38530945  | -0.01672323 | C         | -3.35925543 | -1.08743122 | 0.00000193  |
| C         | -0.75407760 | -1.57176694 | -0.06524118 | H         | -3.75105564 | -2.10297573 | 0.00000412  |
| H         | 2.42681849  | 1.84058761  | 0.03091745  | H         | -3.70888029 | -0.56161039 | 0.89465293  |
| C         | -2.10570616 | -1.81974260 | -0.10354868 | H         | -3.70888486 | -0.56161267 | -0.89464867 |
| H         | -0.05526457 | -2.39312926 | -0.07396424 |           |             |             |             |
| H         | -2.46710399 | -2.84140806 | -0.15616867 | <b>1j</b> |             |             |             |
| N         | 2.19532712  | -0.72302128 | 0.00964078  | C         | 2.45823864  | -1.35340373 | 0.00000015  |
| O         | 3.25503757  | -0.32730293 | -0.46023489 | C         | 1.20384450  | -0.69512500 | 0.00000055  |
| O         | 2.02430568  | -1.83828017 | 0.48869066  | C         | 1.20351003  | 0.72567926  | 0.00000038  |
| N         | -3.06743272 | -0.86059628 | -0.07604191 | C         | 2.46098900  | 1.37350652  | -0.00000019 |
|           |             |             |             | C         | 3.61174030  | 0.61894395  | -0.00000059 |
| <b>1i</b> |             |             |             | H         | -0.01075175 | -2.48035033 | 0.00000124  |
| C         | 2.49384824  | 0.56503646  | 0.00000058  | H         | 2.48240818  | -2.44212376 | 0.00000027  |
| C         | 1.09582710  | 0.82020190  | 0.00000016  | C         | -0.03166946 | -1.39830538 | 0.00000107  |
| C         | 0.22958819  | -0.30814581 | -0.00000042 | C         | -0.03925530 | 1.41431985  | 0.00000062  |
| C         | 0.82025495  | -1.59331048 | -0.00000061 | H         | 2.51700612  | 2.45685307  | -0.00000036 |
| C         | 2.19088959  | -1.69995438 | -0.00000026 | H         | 4.58604929  | 1.09746910  | -0.00000108 |
| H         | 1.23106879  | 2.98446331  | 0.00000079  | C         | -1.22496670 | -0.71975704 | 0.00000129  |
| H         | 3.17946025  | 1.41064727  | 0.00000122  | N         | 3.62325240  | -0.73778376 | -0.00000043 |
| C         | 0.55899148  | 2.13382221  | 0.00000028  | C         | -1.22735472 | 0.72203917  | 0.00000098  |
| C         | -1.18403213 | -0.08872875 | -0.00000082 | O         | -2.45819622 | 1.28415739  | 0.00000105  |
| H         | 0.19574877  | -2.47665128 | -0.00000098 | O         | -2.45525080 | -1.28923317 | 0.00000178  |
| H         | 2.66882167  | -2.67429972 | -0.00000008 | H         | -0.03238299 | 2.49618646  | 0.00000043  |

|           |             |             |             |           |             |             |             |
|-----------|-------------|-------------|-------------|-----------|-------------|-------------|-------------|
| C         | -2.55402927 | 2.70326683  | 0.00000045  | C         | -1.51344826 | 2.08646029  | 0.00000100  |
| H         | -3.61931872 | 2.92614678  | 0.00000035  | C         | -1.71945529 | 0.68197345  | 0.00000026  |
| H         | -2.09056232 | 3.13223842  | 0.89465376  | C         | -0.57266283 | -0.17231809 | 0.00000009  |
| H         | -2.09056230 | 3.13223764  | -0.89465322 | C         | 0.68695427  | 0.48529399  | 0.00000004  |
| C         | -2.53733437 | -2.70845434 | 0.00000144  | C         | 0.76331078  | 1.85703571  | -0.00000037 |
| H         | -2.06953577 | -3.13361093 | -0.89452197 | H         | -3.87790006 | 0.77033252  | -0.00000010 |
| H         | -2.06953491 | -3.13361147 | 0.89452415  | H         | -2.37835132 | 2.74663683  | -0.00000069 |
| H         | -3.60027915 | -2.94260145 | 0.00000189  | C         | -3.01656826 | 0.11090978  | -0.00000015 |
|           |             |             |             | C         | -0.76974643 | -1.57600580 | 0.00000005  |
| <b>1k</b> |             |             |             | H         | 1.72479502  | 2.35703864  | -0.00000041 |
| C         | -0.41962186 | 2.15632804  | -0.00000455 | C         | -3.17650672 | -1.25318047 | -0.00000018 |
| C         | -0.99828612 | 0.85978086  | -0.00000130 | N         | -0.33189210 | 2.65841705  | -0.00000048 |
| C         | -0.12592634 | -0.27176266 | -0.00000037 | C         | -2.04204078 | -2.09779706 | -0.00000010 |
| C         | 1.26437564  | 0.01888209  | 0.00000011  | H         | 0.09189085  | -2.23044360 | 0.00000006  |
| C         | 1.70943401  | 1.31843252  | 0.00000223  | H         | -2.17913076 | -3.17321251 | -0.00000017 |
| H         | -3.05433052 | 1.52397717  | 0.00000032  | H         | -4.16936724 | -1.68765374 | -0.00000027 |
| H         | -1.07316286 | 3.02616852  | 0.00000307  | Br        | 2.32206541  | -0.51788138 | 0.00000003  |
| C         | -2.40112569 | 0.65796432  | 0.00000049  |           |             |             |             |
| C         | -0.68981849 | -1.57209131 | -0.00000009 | <b>1m</b> |             |             |             |
| H         | 2.77173979  | 1.53424590  | 0.00000177  | C         | -0.23241638 | -0.31288042 | 0.00000023  |
| C         | -2.92090850 | -0.61350520 | 0.00000084  | C         | -0.82151366 | -1.60066234 | 0.00000032  |
| N         | 0.87305934  | 2.38634603  | 0.00000200  | C         | -1.06821779 | 0.83836678  | 0.00000008  |
| C         | -2.05560426 | -1.73257415 | 0.00000049  | C         | -2.19184519 | -1.73027771 | 0.00000025  |
| H         | -0.03522636 | -2.43359139 | 0.00000009  | H         | -0.18029075 | -2.47221770 | 0.00000044  |
| H         | -2.47741998 | -2.73125883 | 0.00000104  | C         | 1.17826706  | -0.09261555 | 0.00000035  |
| H         | -3.99399642 | -0.76534713 | 0.00000125  | C         | -2.47510909 | 0.67103654  | 0.00000001  |
| Cl        | 2.44563945  | -1.28160844 | -0.00000050 | C         | -0.44772727 | 2.11889307  | 0.00000002  |
|           |             |             |             | C         | -3.02645442 | -0.58867847 | 0.00000011  |
| <b>1l</b> |             |             |             | H         | -2.63961987 | -2.71776884 | 0.00000033  |

|   |             |             |             |   |             |             |             |
|---|-------------|-------------|-------------|---|-------------|-------------|-------------|
| C | 1.65743042  | 1.20161380  | 0.00000026  | C | -1.48357991 | 0.23072402  | -0.03463054 |
| O | 1.95083087  | -1.21218633 | 0.00000049  | C | -2.37330067 | 0.71353884  | 0.93440700  |
| H | -3.10837567 | 1.55192706  | -0.00000010 | C | -1.96214646 | -0.68178244 | -0.98613017 |
| N | 0.85036307  | 2.29697635  | 0.00000010  | C | -3.70208428 | 0.29374819  | 0.95507995  |
| H | -1.07004395 | 3.01129089  | -0.00000011 | H | -2.01562373 | 1.41303500  | 1.68171706  |
| H | -4.10346654 | -0.71225176 | 0.00000009  | C | -3.29045466 | -1.09932293 | -0.96681140 |
| H | 2.72003415  | 1.40937522  | 0.00000030  | H | -1.29344868 | -1.04936493 | -1.75646645 |
| C | 3.36665215  | -1.05937474 | 0.00000214  | C | -4.16486213 | -0.61448005 | 0.00530457  |
| H | 3.70722648  | -0.52765979 | -0.89431932 | H | -4.37409688 | 0.67506019  | 1.71584300  |
| H | 3.70722425  | -0.52765866 | 0.89432376  | H | -3.64474109 | -1.79831190 | -1.71633974 |
| H | 3.77374422  | -2.06890457 | 0.00000327  | H | -5.19865124 | -0.94059285 | 0.02023664  |

**In**

|   |             |             |             |
|---|-------------|-------------|-------------|
| C | 2.44115601  | 1.82987616  | -0.20590587 |
| C | 2.34755205  | 0.42201463  | -0.05031244 |
| C | 1.04755546  | -0.16260459 | 0.03080775  |
| C | -0.07721126 | 0.71619329  | -0.07230899 |
| C | 0.17083518  | 2.06854711  | -0.21354170 |
| H | 4.47889936  | 0.06275863  | -0.02444941 |
| H | 3.42584341  | 2.29022605  | -0.26613622 |
| C | 3.49940461  | -0.39895579 | 0.04456049  |
| C | 0.95381295  | -1.56475739 | 0.23972918  |
| H | -0.66182630 | 2.75955957  | -0.30009254 |
| C | 3.37438076  | -1.75435036 | 0.22816212  |
| N | 1.40411345  | 2.63133618  | -0.27790130 |
| C | 2.08909034  | -2.33561521 | 0.33414621  |
| H | -0.02176613 | -2.02352373 | 0.33522991  |
| H | 2.00002026  | -3.40382508 | 0.49817035  |
| H | 4.25570892  | -2.38101506 | 0.30225943  |

**Io**

|   |             |             |             |
|---|-------------|-------------|-------------|
| C | 0.75471263  | -1.56843604 | -0.00000034 |
| C | 0.57981120  | -0.15617469 | -0.00000000 |
| C | 1.76042193  | 0.65124532  | 0.00000005  |
| C | 3.00715309  | -0.02196700 | 0.00000008  |
| C | 3.03831670  | -1.39336827 | 0.00000025  |
| H | -0.12136573 | -2.20839338 | 0.00000024  |
| C | -0.67831943 | 0.50592814  | 0.00000012  |
| C | 1.64801804  | 2.06455856  | -0.00000002 |
| H | 3.98246394  | -1.92831469 | -0.00000024 |
| C | -0.76812247 | 1.87593062  | 0.00000000  |
| N | 1.92325326  | -2.16960183 | -0.00000009 |
| C | 0.41037514  | 2.65770587  | -0.00000007 |
| H | 2.55041351  | 2.66547125  | -0.00000007 |
| H | 0.32087846  | 3.73796851  | -0.00000019 |
| H | -1.73695741 | 2.35802916  | -0.00000008 |
| H | 3.92815977  | 0.55030995  | -0.00000011 |

|           |             |             |             |           |             |             |             |
|-----------|-------------|-------------|-------------|-----------|-------------|-------------|-------------|
| Br        | -2.31144475 | -0.50515409 | 0.00000002  | H         | 5.18565339  | -0.91775199 | 0.00014790  |
| <b>1p</b> |             |             |             | <b>1q</b> |             |             |             |
| C         | -0.92802438 | -1.55217782 | -0.25379323 | C         | 2.87256893  | 1.13762076  | 0.00569721  |
| C         | -1.05622394 | -0.15065377 | -0.03335302 | C         | 1.48184802  | 1.19171077  | 0.00602602  |
| C         | -2.38367833 | 0.37134530  | 0.04765074  | C         | 0.74587625  | -0.00000011 | 0.00000003  |
| C         | -3.45781548 | -0.54857376 | -0.04813684 | C         | 1.48184799  | -1.19171102 | -0.00602610 |
| C         | -3.19379488 | -1.88192668 | -0.23258241 | C         | 2.87256889  | -1.13762105 | -0.00569758 |
| H         | 0.06193373  | -1.98229330 | -0.36607496 | N         | 3.57442224  | -0.00000015 | -0.00000024 |
| C         | 0.06232101  | 0.73941199  | 0.06456358  | C         | -0.73775617 | -0.00000009 | 0.00000018  |
| C         | -2.57895755 | 1.76664038  | 0.20329976  | C         | -1.45587840 | -0.93207738 | -0.76311031 |
| H         | -4.00080216 | -2.60395738 | -0.30680333 | C         | -1.45587819 | 0.93207722  | 0.76311084  |
| C         | -0.18105994 | 2.09374251  | 0.19725497  | C         | -2.84803449 | -0.93046774 | -0.76498214 |
| N         | -1.93849771 | -2.38910898 | -0.34960552 | C         | -2.84803429 | 0.93046764  | 0.76498299  |
| C         | -1.49524232 | 2.60707895  | 0.26565451  | C         | -3.54959388 | -0.00000004 | 0.00000049  |
| H         | -3.58927580 | 2.15582328  | 0.26708332  | H         | 3.45217335  | 2.05671348  | 0.00345495  |
| H         | -1.64046002 | 3.67541387  | 0.38144699  | H         | 0.98091647  | 2.15238226  | -0.01375261 |
| H         | 0.65836985  | 2.77501187  | 0.27809946  | H         | 0.98091641  | -2.15238250 | 0.01375267  |
| H         | -4.48057812 | -0.19363314 | 0.01768042  | H         | 3.45217329  | -2.05671378 | -0.00345537 |
| C         | 1.47010922  | 0.25077852  | 0.03412738  | H         | -0.92035437 | -1.64624584 | -1.37821983 |
| C         | 2.36284395  | 0.72868145  | -0.93450507 | H         | -0.92035401 | 1.64624566  | 1.37822024  |
| C         | 1.94533657  | -0.65536088 | 0.99281299  | H         | -3.38517873 | -1.65226682 | -1.36998210 |
| C         | 3.69163333  | 0.30938498  | -0.94827138 | H         | -3.38517837 | 1.65226674  | 1.36998306  |
| H         | 2.00689875  | 1.42157174  | -1.68885483 | H         | -4.63361525 | -0.00000002 | 0.00000061  |
| C         | 3.27450848  | -1.07063479 | 0.98178731  |           |             |             |             |
| H         | 1.27355989  | -1.02191540 | 1.76081585  | <b>1r</b> |             |             |             |
| C         | 4.15188750  | -0.59147323 | 0.00991874  | C         | 1.48655174  | 1.52292495  | 0.05958294  |
| H         | 4.36543276  | 0.68395502  | -1.71080471 | C         | 0.75239987  | 0.32609139  | 0.05841169  |
| H         | 3.62569233  | -1.76604071 | 1.73593424  | C         | 1.48945072  | -0.86390227 | 0.06878197  |



|           |             |             |             |           |             |             |             |
|-----------|-------------|-------------|-------------|-----------|-------------|-------------|-------------|
| C         | 2.87836046  | -0.80840254 | 0.07355225  | C         | -0.50215304 | -0.47248603 | 0.00000000  |
| C         | -0.73041620 | 0.33392840  | 0.05143175  | C         | 0.48852003  | 0.43768303  | 0.00000000  |
| C         | -1.45768216 | -0.56518406 | 0.84539164  | H         | -0.25061202 | -1.52934211 | 0.00000000  |
| C         | -1.44119385 | 1.24141742  | -0.74789874 | H         | 0.22565502  | 1.49229611  | 0.00000000  |
| C         | -2.84985544 | -0.55782747 | 0.83988900  | C         | 1.93059514  | 0.17934401  | 0.00000000  |
| C         | -2.83360547 | 1.24912844  | -0.75257559 | C         | 2.48923018  | -1.11192108 | 0.00000000  |
| C         | -3.54367932 | 0.34977169  | 0.04098162  | C         | 2.81030520  | 1.27519609  | 0.00000000  |
| C         | 3.49775449  | 0.43937759  | 0.06277544  | C         | 3.86611828  | -1.29279809 | 0.00000000  |
| N         | 2.81858637  | 1.59032335  | 0.05848690  | H         | 1.84463013  | -1.98281414 | -0.00000100 |
| H         | 0.96344954  | 2.47491927  | 0.08081711  | C         | 4.19043230  | 1.09463908  | 0.00000000  |
| H         | 0.97861765  | -1.82028245 | 0.05117613  | H         | 2.40109317  | 2.28028817  | 0.00000000  |
| H         | 3.47312388  | -1.71438831 | 0.07327525  | C         | 4.72523634  | -0.19134201 | 0.00000000  |
| H         | -0.92871615 | -1.25880192 | 1.48952278  | H         | 4.27462831  | -2.29721317 | -0.00000100 |
| H         | -0.89979339 | 1.92920833  | -1.38747638 | H         | 4.84671335  | 1.95760814  | 0.00000000  |
| H         | -3.39319033 | -1.25579582 | 1.46707222  | H         | 5.79928644  | -0.33743702 | 0.00000000  |
| H         | -3.36413897 | 1.95343969  | -1.38354694 | N         | -4.74490534 | 0.22062602  | 0.00000000  |
| H         | -4.62767222 | 0.35597678  | 0.03697832  |           |             |             |             |
| H         | 4.58090655  | 0.52009393  | 0.05749874  | <b>It</b> |             |             |             |
|           |             |             |             | C         | -1.52334435 | -1.19223029 | -0.02440123 |
| <b>Is</b> |             |             |             | C         | -0.77052480 | -0.00358756 | -0.00013511 |
| C         | -4.21781230 | -1.00668707 | 0.00000000  | N         | -1.39708833 | 1.18334622  | -0.02221310 |
| C         | -3.87906928 | 1.24285309  | 0.00000000  | C         | -2.72854601 | 1.17351393  | -0.03435822 |
| C         | -2.49836618 | 1.09572508  | 0.00000000  | C         | -3.46024042 | -0.01166181 | -0.02118886 |
| C         | -1.93966414 | -0.19347601 | 0.00000000  | N         | -2.85406091 | -1.20161439 | -0.02659013 |
| C         | -2.84976020 | -1.26145809 | 0.00000000  | C         | 0.71239348  | -0.00443471 | 0.02373558  |
| H         | -4.92497235 | -1.83171413 | 0.00000100  | C         | 1.43811647  | -1.09265912 | 0.52973467  |
| H         | -4.31755631 | 2.23698016  | 0.00000000  | C         | 1.41727152  | 1.10578525  | -0.46346231 |
| H         | -1.87411913 | 1.98085214  | 0.00000000  | C         | 2.83025948  | -1.07576153 | 0.53649550  |
| H         | -2.49208818 | -2.28551716 | 0.00000000  | C         | 2.80784455  | 1.11864589  | -0.46007105 |

|           |             |             |             |           |             |             |             |
|-----------|-------------|-------------|-------------|-----------|-------------|-------------|-------------|
| C         | 3.52026591  | 0.02774444  | 0.03811622  | C         | -0.05536202 | -0.56302229 | 0.00000010  |
| H         | -1.03521597 | -2.16013081 | -0.06190156 | C         | 1.05719675  | -1.40525828 | -0.00000003 |
| H         | -3.22840170 | 2.13785559  | -0.05186598 | C         | 2.30572426  | -0.79877666 | -0.00000008 |
| H         | -4.54562039 | -0.00419995 | -0.01508091 | N         | 2.50360718  | 0.53436381  | -0.00000006 |
| H         | 0.91981116  | -1.94897859 | 0.94473373  | H         | 1.62550410  | 2.39613107  | 0.00000009  |
| H         | 0.85881721  | 1.95216914  | -0.84225640 | H         | 0.96527886  | -2.48446182 | -0.00000014 |
| H         | 3.37534190  | -1.92189194 | 0.93931486  | H         | 3.20320673  | -1.40943251 | -0.00000019 |
| H         | 3.33781829  | 1.98184483  | -0.84689388 | C         | -1.13272209 | 1.54579124  | 0.00000005  |
| H         | 4.60432023  | 0.03976143  | 0.04253120  | C         | -2.19996774 | 0.71092441  | -0.00000024 |
|           |             |             |             | S         | -1.75358991 | -0.98487591 | 0.00000007  |
| <b>1u</b> |             |             |             | H         | -1.21710924 | 2.62454802  | -0.00000009 |
| C         | 0.04044349  | 0.86567312  | -0.00000000 | H         | -3.24740429 | 0.97307724  | -0.00000043 |
| C         | 0.00000000  | -0.54631685 | 0.00000000  |           |             |             |             |
| C         | 1.18759780  | -1.28306802 | 0.00000000  | <b>1w</b> |             |             |             |
| C         | 2.42409672  | 0.65338677  | -0.00000000 | C         | 2.38331514  | -0.62699035 | -0.00000041 |
| C         | 1.30691962  | 1.47199372  | -0.00000000 | C         | 1.23178938  | -1.37609799 | 0.00000005  |
| C         | -2.25510118 | 0.50120639  | -0.00000000 | C         | -0.01899234 | -0.71401659 | 0.00000062  |
| H         | 1.17612979  | -2.36949481 | 0.00000000  | C         | -0.00582850 | 0.71009985  | 0.00000024  |
| H         | 3.41893827  | 1.08762148  | -0.00000000 | C         | 1.25552246  | 1.36357290  | 0.00000027  |
| H         | 1.41288001  | 2.55078331  | -0.00000000 | H         | 3.35541359  | -1.10921056 | -0.00000060 |
| N         | 2.37810360  | -0.69451097 | 0.00000000  | H         | 1.25611213  | -2.45880287 | -0.00000003 |
| S         | -1.65160301 | -1.13781740 | 0.00000000  | C         | -1.24663182 | 1.38937356  | -0.00000007 |
| C         | -1.27654405 | 1.44189521  | -0.00000000 | H         | 1.28753412  | 2.45196971  | -0.00000033 |
| H         | -3.32302255 | 0.66280101  | -0.00000000 | C         | -2.40258811 | 0.65027164  | -0.00000021 |
| H         | -1.47047698 | 2.50632219  | -0.00000000 | C         | -2.30697608 | -0.76471110 | -0.00000037 |
|           |             |             |             | H         | -1.26871287 | 2.47442170  | -0.00000002 |
| <b>1v</b> |             |             |             | H         | -3.37778626 | 1.12201002  | -0.00000014 |
| C         | 1.43874932  | 1.32487652  | 0.00000005  | H         | -3.21753986 | -1.35936960 | 0.00000028  |
| C         | 0.12016687  | 0.83839939  | 0.00000018  | N         | 2.40818199  | 0.73443836  | -0.00000009 |

|           |             |             |             |           |             |             |             |
|-----------|-------------|-------------|-------------|-----------|-------------|-------------|-------------|
| N         | -1.17570792 | -1.43587121 | 0.00000009  | C         | -0.72227000 | -0.39683711 | -0.00000008 |
|           |             |             |             | C         | -1.38242221 | 0.86357929  | -0.00000018 |
| <b>1x</b> |             |             |             | C         | -2.79273461 | 0.91433934  | -0.00000015 |
| C         | 2.39510764  | -0.71618403 | 0.00000000  | H         | -3.25862202 | 1.89240399  | -0.00000022 |
| C         | 1.20508459  | -1.40346767 | 0.00000000  | C         | -3.53911004 | -0.24493840 | -0.00000004 |
| C         | -0.02900557 | -0.70398503 | -0.00000000 | C         | -2.89238401 | -1.49408583 | 0.00000006  |
| C         | -0.01417236 | 0.72606275  | 0.00000000  | C         | -1.51338830 | -1.56645318 | 0.00000004  |
| C         | 1.23114107  | 1.40589110  | 0.00000000  | H         | 1.10253306  | 3.00623868  | -0.00000043 |
| C         | 2.40995354  | 0.69974593  | 0.00000000  | H         | 4.63130310  | -0.19637538 | -0.00000026 |
| H         | 3.33387747  | -1.25867231 | 0.00000000  | H         | 3.28164352  | 1.88452253  | -0.00000039 |
| H         | 1.17101216  | -2.48632799 | 0.00000000  | H         | 1.05043021  | -2.54836751 | 0.00000006  |
| C         | -1.26451192 | 1.39201303  | 0.00000000  | H         | 3.48890760  | -2.40279670 | -0.00000003 |
| H         | 1.23755531  | 2.49112978  | 0.00000000  | H         | -4.62206657 | -0.19632175 | -0.00000002 |
| H         | 3.35829434  | 1.22499447  | 0.00000000  | H         | -3.47895358 | -2.40583664 | 0.00000015  |
| C         | -2.42009684 | 0.65242258  | 0.00000000  | H         | -1.03852891 | -2.53976500 | 0.00000011  |
| C         | -2.32394437 | -0.76094746 | -0.00000000 | N         | -0.70671808 | 2.06991170  | -0.00000030 |
| H         | -1.29270786 | 2.47703952  | -0.00000000 |           |             |             |             |
| H         | -3.39481382 | 1.12573654  | -0.00000000 | <b>1z</b> |             |             |             |
| H         | -3.23181538 | -1.35977373 | 0.00000002  | C         | -3.47866384 | -0.37074430 | 0.00000086  |
| N         | -1.18839099 | -1.42334763 | 0.00000000  | C         | -2.82512734 | 0.84058711  | 0.00000011  |
|           |             |             |             | C         | -1.41472491 | 0.86794173  | -0.00000070 |
| <b>1y</b> |             |             |             | C         | -0.72934258 | -0.37934865 | -0.00000283 |
| C         | 3.54856197  | -0.24399572 | -0.00000022 | C         | -2.70356555 | -1.54653288 | 0.00000101  |
| C         | 2.79837796  | 0.91293408  | -0.00000029 | C         | -0.67895774 | 2.09833742  | -0.00000013 |
| C         | 1.38903736  | 0.85052510  | -0.00000024 | C         | 0.72934251  | -0.37934862 | 0.00000204  |
| C         | 0.72818702  | -0.40425077 | -0.00000012 | C         | 1.41472466  | 0.86794186  | 0.00000053  |
| C         | 1.52044079  | -1.57321009 | -0.00000004 | C         | 2.82512711  | 0.84058734  | 0.00000049  |
| C         | 2.89947969  | -1.49269891 | -0.00000009 | H         | 3.37697418  | 1.77505224  | 0.00000033  |
| C         | 0.58995515  | 2.04457605  | -0.00000033 | C         | 3.47866396  | -0.37074400 | -0.00000006 |

|                          |             |             |             |                                     |             |             |             |
|--------------------------|-------------|-------------|-------------|-------------------------------------|-------------|-------------|-------------|
| C                        | 2.70356602  | -1.54653272 | -0.00000088 |                                     |             |             |             |
| H                        | -1.23145399 | 3.03221219  | 0.00000001  | <b>3a</b>                           |             |             |             |
| H                        | -4.56058213 | -0.43079435 | 0.00000186  | C                                   | 0.75685075  | 0.46931296  | -0.00000308 |
| H                        | -3.37697447 | 1.77505200  | 0.00000066  | C                                   | -0.54064166 | -0.13334251 | -0.00000042 |
| H                        | -3.19306902 | -2.51759551 | 0.00000033  | C                                   | -1.65350140 | 0.76380810  | 0.00000025  |
| H                        | 4.56058225  | -0.43079392 | -0.00000013 | C                                   | -1.38970474 | 2.15530106  | -0.00000151 |
| H                        | 3.19306966  | -2.51759530 | -0.00000042 | C                                   | -0.09227759 | 2.59736206  | -0.00000322 |
| C                        | 0.67895736  | 2.09833750  | -0.00000029 | H                                   | 0.03895232  | -2.22841040 | 0.00000052  |
| H                        | 1.23145325  | 3.03221260  | -0.00000060 | C                                   | -0.78802701 | -1.53237703 | 0.00000113  |
| N                        | -1.38361316 | -1.56004584 | -0.00000154 | C                                   | -2.97095509 | 0.23766661  | 0.00000220  |
| N                        | 1.38361348  | -1.56004569 | 0.00000111  | H                                   | -2.21218522 | 2.86187437  | -0.00000123 |
|                          |             |             |             | H                                   | 0.14316594  | 3.65601341  | -0.00000503 |
| <b>1<math>\pi</math></b> |             |             |             | C                                   | -3.17710308 | -1.11955754 | 0.00000317  |
| C                        | 2.39366628  | 0.69556877  | 0.00000027  | C                                   | -2.07708432 | -2.00838328 | 0.00000252  |
| C                        | 1.21626934  | 1.40424223  | -0.00000009 | H                                   | -3.80951655 | 0.92527971  | 0.00000281  |
| C                        | -0.02005456 | 0.71303109  | -0.00000031 | H                                   | -2.25435705 | -3.07758846 | 0.00000297  |
| C                        | -0.03990263 | -0.71056620 | -0.00000039 | N                                   | 0.97472643  | 1.76003150  | -0.00000378 |
| C                        | 1.18857365  | -1.41606433 | 0.00000002  | H                                   | -4.18582692 | -1.51651172 | 0.00000471  |
| C                        | 2.37538602  | -0.72148107 | 0.00000026  | C                                   | 2.00975506  | -0.40097803 | -0.00000007 |
| C                        | -1.28675236 | 1.34753432  | -0.00000041 | F                                   | 2.04173667  | -1.21535897 | 1.08852714  |
| C                        | -2.31827691 | -0.67614258 | 0.00000063  | F                                   | 2.04173715  | -1.21536294 | -1.08852415 |
| H                        | -1.34800663 | 2.43487135  | 0.00000083  | F                                   | 3.13795029  | 0.30697172  | -0.00000123 |
| H                        | 3.34398565  | 1.21667173  | 0.00000056  |                                     |             |             |             |
| H                        | 1.21888890  | 2.48933888  | -0.00000009 | <b>TS (broken-symmetry singlet)</b> |             |             |             |
| H                        | 1.15805619  | -2.49883241 | 0.00000001  | C                                   | 2.14596280  | -0.01156764 | -0.16762987 |
| H                        | 3.31540802  | -1.26188571 | 0.00000046  | C                                   | 3.53749871  | 0.28932504  | -0.32833915 |
| H                        | -3.26124736 | -1.21476490 | 0.00000221  | C                                   | 4.31252126  | -0.56666243 | -1.16648093 |
| N                        | -2.41972127 | 0.68206366  | 0.00000013  | C                                   | 3.63720552  | -1.62939300 | -1.82269438 |
| N                        | -1.22035556 | -1.39379686 | -0.00000068 | C                                   | 2.27624836  | -1.78196621 | -1.64989456 |

|   |             |             |             |                                     |             |             |             |
|---|-------------|-------------|-------------|-------------------------------------|-------------|-------------|-------------|
| H | 3.55616379  | 2.00883626  | 0.98173916  | C                                   | -1.06496781 | 2.03818869  | 0.04679979  |
| H | 1.49978326  | 0.68521785  | 0.36307021  | O                                   | -0.32330937 | 1.74277753  | 0.97652899  |
| C | 4.15623516  | 1.36997515  | 0.34031690  | C                                   | -1.52853797 | 3.52901638  | -0.09026419 |
| C | 5.69921669  | -0.30881063 | -1.31560487 | F                                   | -1.29045336 | 4.00398100  | -1.32721037 |
| H | 4.18672042  | -2.30662585 | -2.46896716 | F                                   | -2.85269876 | 3.62581087  | 0.14492680  |
| H | 1.73578513  | -2.57285681 | -2.16317794 | F                                   | -0.89248225 | 4.31767836  | 0.78652929  |
| C | 6.28001471  | 0.75402871  | -0.65628325 |                                     |             |             |             |
| C | 5.50654627  | 1.60030487  | 0.17550733  |                                     |             |             |             |
| H | 6.29171318  | -0.95761209 | -1.95402419 | <b>1a for mechanism calculation</b> |             |             |             |
| H | 5.98360697  | 2.43185215  | 0.68473230  | C                                   | -1.25013643 | 1.37505753  | 0.00000000  |
| N | 1.52905461  | -0.97454624 | -0.86143284 | C                                   | 0.00000000  | 0.69981134  | 0.00000000  |
| H | 7.34191099  | 0.94823862  | -0.77330388 | C                                   | -0.01779171 | -0.72828603 | -0.00000000 |
| I | -1.31573967 | -1.25822645 | -0.40088344 | C                                   | -1.28683208 | -1.36172487 | 0.00000000  |
| C | -3.42564018 | -1.18951002 | -0.10123093 | C                                   | -2.42625380 | -0.59207312 | 0.00000000  |
| C | -3.92253301 | -0.94324147 | 1.18213368  | H                                   | 1.24207279  | 2.47408766  | -0.00000000 |
| C | -4.28030568 | -1.36678848 | -1.19305834 | H                                   | -1.25581041 | 2.46545173  | 0.00000000  |
| C | -5.30359875 | -0.88249023 | 1.37104294  | C                                   | 1.24053217  | 1.38738268  | 0.00000000  |
| H | -3.24779369 | -0.80070968 | 2.01907421  | C                                   | 1.21549889  | -1.43076823 | -0.00000000 |
| C | -5.65917263 | -1.30439712 | -0.98802357 | H                                   | -1.35301106 | -2.44576596 | 0.00000000  |
| H | -3.88107166 | -1.54976923 | -2.18467185 | H                                   | -3.40795857 | -1.05952626 | 0.00000000  |
| C | -6.17055799 | -1.06226355 | 0.28974617  | C                                   | 2.40616908  | -0.73825432 | -0.00000000 |
| H | -5.70011323 | -0.69279745 | 2.36376117  | C                                   | 2.42162150  | 0.68008895  | -0.00000000 |
| H | -6.33190583 | -1.44250383 | -1.82887735 | H                                   | 1.20479118  | -2.51712343 | -0.00000000 |
| H | -7.24415803 | -1.01285468 | 0.44269312  | H                                   | 3.37246116  | 1.20419988  | -0.00000000 |
| C | 2.33576690  | -1.16775865 | 1.86282394  | N                                   | -2.42382487 | 0.77305211  | 0.00000000  |
| F | 3.07214101  | -0.46086702 | 2.71768208  | H                                   | 3.34738325  | -1.28009198 | -0.00000000 |
| F | 2.93989664  | -2.31593430 | 1.56632820  |                                     |             |             |             |
| F | 1.12677442  | -1.39742617 | 2.37010917  | <b>INT1</b>                         |             |             |             |
| O | -1.58665299 | 1.33372080  | -0.88457765 | C                                   | -2.10546215 | -2.95447821 | -1.54542011 |



|   |             |             |             |   |             |             |             |
|---|-------------|-------------|-------------|---|-------------|-------------|-------------|
| H | 5.65571600  | 2.48747344  | 1.22755654  | C | 0.88065497  | 1.74129459  | -0.85606075 |
| N | 1.83962383  | -1.13092277 | -1.22035150 | C | 0.00009293  | 1.09936286  | -0.00000381 |
| H | 7.37228211  | 0.89855208  | 0.39212340  | C | -0.88040895 | 1.74133711  | 0.85608326  |
| I | -0.98382423 | -1.54844494 | -0.60261539 | C | -0.87139420 | 3.13975516  | 0.84057764  |
| C | -2.99563042 | -1.22915066 | 0.02144704  | C | 0.00022391  | 3.83406234  | 0.00006289  |
| C | -3.21287379 | -0.62994324 | 1.26554220  | H | 1.54764655  | 3.67662499  | -1.49814227 |
| C | -4.05107561 | -1.57422031 | -0.82620184 | H | 1.55958147  | 1.19619620  | -1.49902917 |
| C | -4.52573405 | -0.38191416 | 1.66751973  | H | -1.55938910 | 1.19627271  | 1.49902398  |
| H | -2.37825634 | -0.35782521 | 1.90026711  | H | -1.54721490 | 3.67670008  | 1.49825920  |
| C | -5.35780090 | -1.32292443 | -0.40526681 | H | 0.00027628  | 4.91910501  | 0.00009000  |
| H | -3.86218124 | -2.02808044 | -1.79278670 | I | -0.00000706 | -1.08484558 | -0.00005366 |
| C | -5.59520516 | -0.72739967 | 0.83655935  | O | -2.14370046 | -0.96013814 | 0.44973194  |
| H | -4.71069886 | 0.08330642  | 2.63087075  | C | -2.91554989 | -0.53180755 | -0.52003730 |
| H | -6.18825770 | -1.58894124 | -1.05192739 | O | -2.61701000 | -0.24767273 | -1.66016266 |
| H | -6.61394698 | -0.53082328 | 1.15589036  | C | -4.36231462 | -0.35604828 | 0.00577009  |
| C | 0.92438200  | -0.26608827 | 2.31627698  | F | -5.19469848 | -0.02077647 | -0.98570874 |
| F | 1.61008437  | 0.82764231  | 2.62588200  | F | -4.81501498 | -1.48344157 | 0.57976352  |
| F | 1.67817840  | -1.35350060 | 2.45290913  | F | -4.38631311 | 0.62520776  | 0.93096482  |
| F | -0.17850084 | -0.36021984 | 3.05347424  | O | 2.61707986  | -0.24799759 | 1.66009271  |
| O | -1.19434662 | 0.95549907  | -1.44954703 | C | 2.91558819  | -0.53209496 | 0.51994974  |
| C | -1.06186509 | 1.75793491  | -0.46239967 | O | 2.14369701  | -0.96031056 | -0.44983704 |
| O | -0.59230348 | 1.59751732  | 0.65888132  | C | 4.36236249  | -0.35642087 | -0.00585965 |
| C | -1.68075435 | 3.15373910  | -0.80658012 | F | 4.81496877  | -1.48381577 | -0.57992375 |
| F | -1.36233173 | 3.55853831  | -2.04871239 | F | 5.19478155  | -0.02127295 | 0.98563149  |
| F | -3.02581352 | 3.07486465  | -0.72610895 | F | 4.38643014  | 0.62488806  | -0.93099679 |
| F | -1.26801727 | 4.09356846  | 0.05527870  |   |             |             |             |

**3a for mechanism calculation**

|             |            |            |             |   |            |            |             |
|-------------|------------|------------|-------------|---|------------|------------|-------------|
| <b>PIFA</b> |            |            |             | C | 0.08878649 | 2.60159014 | -0.00004918 |
| C           | 0.87177463 | 3.13971275 | -0.84048668 | C | 1.38891240 | 2.15770429 | -0.00002549 |

|            |             |             |             |                                      |             |             |             |
|------------|-------------|-------------|-------------|--------------------------------------|-------------|-------------|-------------|
| C          | 1.65185190  | 0.76573433  | 0.00000452  | F                                    | -0.99813576 | -0.67912885 | -1.08942371 |
| C          | 0.53610502  | -0.13089454 | 0.00000877  | C                                    | 0.93956669  | 0.15618662  | -0.00006392 |
| C          | -0.75970935 | 0.46948596  | -0.00001792 | O                                    | 1.49299391  | 1.22629371  | -0.00014017 |
| H          | 3.80886310  | 0.92774187  | 0.00002676  | O                                    | 1.51554294  | -1.04594620 | -0.00007562 |
| H          | -0.14143817 | 3.66313536  | -0.00007233 | H                                    | 2.48580577  | -0.92404200 | -0.00016108 |
| H          | 2.21396419  | 2.86334258  | -0.00002960 |                                      |             |             |             |
| C          | 2.96954725  | 0.23868241  | 0.00003017  | <b>CF<sub>3</sub>COO<sup>-</sup></b> |             |             |             |
| C          | 0.77793657  | -1.53175712 | 0.00003857  | C                                    | -0.52148069 | 0.01333416  | -0.00374451 |
| C          | 2.06841296  | -2.00994488 | 0.00006280  | F                                    | -1.07363246 | 1.24003292  | -0.15762868 |
| C          | 3.17209486  | -1.12163447 | 0.00005865  | F                                    | -1.00645440 | -0.48325575 | 1.16818357  |
| H          | -0.05208067 | -2.22638465 | 0.00004223  | F                                    | -1.03612786 | -0.76652916 | -0.99134956 |
| H          | 2.24507021  | -3.08097269 | 0.00008538  | C                                    | 1.04410546  | 0.01062852  | -0.01179147 |
| H          | 4.18112109  | -1.52216149 | 0.00007814  | O                                    | 1.58537011  | 1.13535186  | -0.00488628 |
| N          | -0.98350672 | 1.76582372  | -0.00004553 | O                                    | 1.52840288  | -1.14235288 | -0.00506775 |
| C          | -2.00003407 | -0.40623903 | -0.00001547 |                                      |             |             |             |
| F          | -2.02852296 | -1.21739394 | 1.08752151  | <b>CF<sub>3</sub><sup>-</sup></b>    |             |             |             |
| F          | -2.02849729 | -1.21743638 | -1.08752148 | C                                    | -0.25814077 | 0.02911071  | 0.10013556  |
| F          | -3.13568830 | 0.30351591  | -0.00004273 | F                                    | 0.42782128  | 0.66220678  | -0.99898193 |
|            |             |             |             | F                                    | 0.42782128  | 0.66220678  | 1.19925305  |
|            |             |             |             | F                                    | 0.42371553  | -1.24144184 | 0.10013556  |
| <b>TFA</b> |             |             |             |                                      |             |             |             |
| C          | -0.59596095 | -0.00158469 | 0.00004557  |                                      |             |             |             |
| F          | -1.18341300 | 1.19774286  | 0.00019296  |                                      |             |             |             |
| F          | -0.99797736 | -0.67931954 | 1.08945269  |                                      |             |             |             |



## 6. References

- 1) C. Xu, J. Liu, W. Ming, Y. Liu, J. Liu, M. Wang and Q. Liu, *Chem. – Eur. J.*, 2013, **19**, 9104.
- 2) a) C. T. Lee and W. T. Yang and R. G. Parr, *Phys. Rev. B*, 1988, **37**, 785; b) A. D. Becke, *J. Chem. Phys.*, 1993, **98**, 5648.
- 3) P. C. Hariharan and J. A. Pople, *Theoret. Chim. Acta.*, **1973**, **28**, 213.
- 4) a) M. Dolg, U. Wedig, H. Stoll and H. Preuss, *J. Chem. Phys.*, 1987, **86**, 866; (b) D. Andrae; U. Häußermann, M. Dolg, H. Stoll and H. Preuß, *Theor. Chim. Acta.*, 1990, **77**, 123.
- 5) a) S. Grimme, J. Antony, S. Ehrlich and H. Krieg, *J. Chem. Phys.*, 2010, **132**, 154104; b) S. Grimme, S. Ehrlich and L. Goerigk, *J. Comput. Chem.*, 2011, **32**, 1456.
- 6) a) E. Cancès, B. Mennucci and J. Tomasi, *J. Chem. Phys.*, 1997, **107**, 3032. b) J. Tomasi, B. Mennucci and E. Cancès, *J. Mol. Struct. (Theochem)*, 1999, **464**, 211.
- 7) (a) K. Fukui, *J. Phys. Chem.*, 1970, **74**, 4161; (b) K. Fukui, *Acc. Chem. Res.*, 1981, **14**, 363.
- 8) Gaussian 16, Revision A.03, M. J. Frisch, G. W. Trucks, H. B. Schlegel, G. E. Scuseria, M. A. Robb, J. R. Cheeseman, G. Scalmani, V. Barone, G. A. Petersson, H. Nakatsuji, X. Li, M. Caricato, A. V. Marenich, J. Bloino, B. G. Janesko, R. Gomperts, B. Mennucci, H. P. Hratchian, J. V. Ortiz, A. F. Izmaylov, J. L. Sonnenberg, D. Williams-Young, F. Ding, F. Lipparini, F. Egidi, J. Goings, B. Peng, A. Petrone, T. Henderson, D. Ranasinghe, V. G. Zakrzewski, J. Gao, N. Rega, G. Zheng, W. Liang, M. Hada, M. Ehara, K. Toyota, R. Fukuda, J. Hasegawa, M. Ishida, T. Nakajima, Y. Honda, O. Kitao, H. Nakai, T. Vreven, K. Throssell, J. A. Montgomery, Jr., J. E. Peralta, F. Ogliaro, M. J. Bearpark, J. J. Heyd, E. N. Brothers, K. N. Kudin, V. N. Staroverov, T. A. Keith, R. Kobayashi, J. Normand, K. Raghavachari, A. P. Rendell, J. C. Burant, S. S. Iyengar, J. Tomasi, M. Cossi, J. M. Millam, M. Klene, C. Adamo, R. Cammi, J. W.

Ochterski, R. L. Martin, K. Morokuma, O. Farkas, J. B. Foresman, and D. J. Fox, Gaussian, Inc., Wallingford CT, 2016.

- 9) R. G. Parr and W. Yang, Density–functional theory of atoms and molecules Oxford University Press, New York, Oxford, 1989.
- 10) T. Lu and F. Chen, *J. Comput. Chem.*, 2012, **33**, 580.
- 11) a) P. Sjobergp, *Can. J. Chem.*, 1990, **68**, 1440; b) P. Politzer, J. S. Murray and F. A. Bulat, *J. Mol. Model*, 2010, **16**,1731.
- 12) A. D. Becke, K. E. Edgecombe, *J. Chem. Phys.*, 1990, **92**, 5397.
- 13) J. S. Murray and P. Politzer, *WIREs Comput. Mol. Sci.*, 2017, e1326.
- 14) S. C. Fosu, C. M. Hambira, A. D. Chen, J. R. Fuchs and D. A. Nagib, *Chem*, 2019, **5**, 417.

## 7. Characterization data for the products

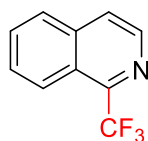

**3a**

### 1-(Trifluoromethyl)isoquinoline (3a)

Yield: 73%, colorless oil.  $^1\text{H}$  NMR (400 MHz,  $\text{CDCl}_3$ )  $\delta$  8.57 (d,  $J = 5.6$  Hz, 1H), 8.28 (d,  $J = 9.3$  Hz, 1H), 7.90 (d,  $J = 8.1$  Hz, 1H), 7.82 (d,  $J = 5.6$  Hz, 1H), 7.78 – 7.73 (m, 1H), 7.69 (ddd,  $J = 8.2, 6.9, 1.3$  Hz, 1H).  $^{13}\text{C}$  NMR (101 MHz,  $\text{CDCl}_3$ )  $\delta$  146.41 (q,  $J = 33.2$  Hz), 140.86, 137.26, 131.00, 128.94, 127.63, 124.81 – 124.71 (m), 124.70, 124.66, 122.23 (q,  $J = 276.4$  Hz).  $^{19}\text{F}$  NMR (376 MHz,  $\text{CDCl}_3$ )  $\delta$  -62.99. ESI-HRMS:  $m/z$  calcd for  $\text{C}_{10}\text{H}_7\text{F}_3\text{N}[\text{M}+\text{H}]^+$ : 198.0525, found: 198.0523.

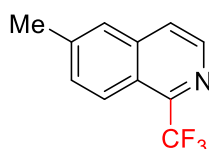

**3b**

### 6-Methyl-1-(trifluoromethyl)isoquinoline (3b)

Yield: 78%, white solid.  $^1\text{H}$  NMR (400 MHz,  $\text{CDCl}_3$ )  $\delta$  8.51 (d,  $J = 5.6$  Hz, 1H), 8.17 (d,  $J = 8.7$  Hz, 1H), 7.73 (d,  $J = 5.6$  Hz, 1H), 7.66 (s, 1H), 7.52 (dd,  $J = 8.8, 1.7$  Hz, 1H), 2.55 (s, 3H).  $^{13}\text{C}$  NMR (101 MHz,  $\text{CDCl}_3$ )  $\delta$  146.17 (q,  $J = 33.2$  Hz), 141.66, 140.85, 137.62, 131.26, 126.41, 124.44 (q,  $J = 2.9$  Hz), 124.11, 123.14, 122.39 (q,  $J = 276.3$  Hz), 22.00.  $^{19}\text{F}$  NMR (376 MHz,  $\text{CDCl}_3$ )  $\delta$  -63.04. ESI-HRMS:  $m/z$  calcd for  $\text{C}_{11}\text{H}_9\text{F}_3\text{N}[\text{M}+\text{H}]^+$ : 212.0681, found: 212.0682.

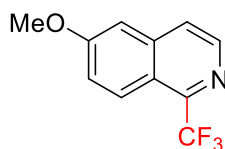

**3c**

### 6-Methoxy-1-(trifluoromethyl)isoquinoline (3c)

Yield: 82%, white solid.  $^1\text{H}$  NMR (400 MHz,  $\text{CDCl}_3$ )  $\delta$  8.43 (d,  $J = 5.6$  Hz, 1H), 8.12 (d,  $J = 11.1$  Hz, 1H), 7.65 (d,  $J = 5.6$  Hz, 1H), 7.26 (dd,  $J = 9.4, 2.6$  Hz, 1H), 7.07 (s, 1H), 3.91 (s, 3H).  $^{13}\text{C}$  NMR (101 MHz,  $\text{CDCl}_3$ )  $\delta$  161.12, 145.75 (q,  $J = 33.1$  Hz),

141.15, 139.57, 126.30 (q,  $J = 3.2$  Hz), 123.72, 122.16, 126.69 – 118.02 (m), 120.33, 104.78, 55.59.  $^{19}\text{F}$  NMR (376 MHz,  $\text{CDCl}_3$ )  $\delta$  -62.83. ESI-HRMS:  $m/z$  calcd for  $\text{C}_{11}\text{H}_9\text{F}_3\text{NO}[\text{M}+\text{H}]^+$ : 228.0631, found: 228.0632.

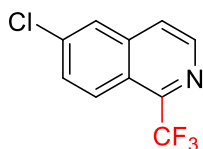

**3d**

### 6-Chloro-1-(trifluoromethyl)isoquinoline (3d)

Yield: 64%, white solid.  $^1\text{H}$  NMR (400 MHz,  $\text{CDCl}_3$ )  $\delta$  8.57 (d,  $J = 5.6$  Hz, 1H), 8.19 (d,  $J = 7.5$  Hz, 1H), 7.86 (s, 1H), 7.72 (d,  $J = 5.6$  Hz, 1H), 7.60 (dd,  $J = 9.2, 2.1$  Hz, 1H).  $^{13}\text{C}$  NMR (101 MHz,  $\text{CDCl}_3$ )  $\delta$  146.63 (q,  $J = 33.6$  Hz), 141.94, 137.97, 137.47, 130.00, 126.43 (q,  $J = 3.1$  Hz), 126.31, 123.61, 122.90, 122.06 (q,  $J = 276.4$  Hz).  $^{19}\text{F}$  NMR (376 MHz,  $\text{CDCl}_3$ )  $\delta$  -63.02. ESI-HRMS:  $m/z$  calcd for  $\text{C}_{10}\text{H}_6\text{ClF}_3\text{N}[\text{M}+\text{H}]^+$ : 232.0135, found: 232.0140.

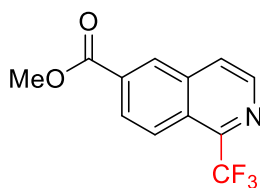

**3e**

### 1-(Trifluoromethyl)isoquinoline-6-carboxymethylate (3e)

Yield: 61%, white solid.  $^1\text{H}$  NMR (400 MHz,  $\text{CDCl}_3$ )  $\delta$  8.66 (d,  $J = 5.6$  Hz, 1H), 8.64 (s, 1H), 8.34 (d,  $J = 9.0$  Hz, 1H), 8.25 (dd,  $J = 9.0, 1.6$  Hz, 1H), 7.95 (d,  $J = 5.6$  Hz, 1H), 4.01 (s, 3H).  $^{13}\text{C}$  NMR (101 MHz,  $\text{CDCl}_3$ )  $\delta$  165.88, 146.72 (q,  $J = 33.6$  Hz), 141.75, 136.65, 132.14, 130.14, 128.28, 126.22, 125.53, 125.18 (q,  $J = 3.1$  Hz), 123.97 – 117.54 (m), 52.91.  $^{19}\text{F}$  NMR (376 MHz,  $\text{CDCl}_3$ )  $\delta$  -63.46. ESI-HRMS:  $m/z$  calcd for  $\text{C}_{12}\text{H}_9\text{F}_3\text{NO}_2[\text{M}+\text{H}]^+$ : 256.0580, found: 256.0579.

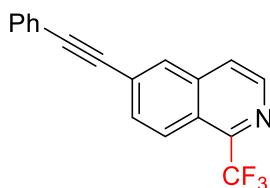

**3f**

### 6-(Phenylethynyl)-1-(trifluoromethyl)isoquinoline (3f)

Yield: 72%, white solid.  $^1\text{H}$  NMR (400 MHz,  $\text{CDCl}_3$ )  $\delta$  8.60 (d,  $J = 5.6$  Hz, 1H), 8.26 (d,  $J = 7.2$  Hz, 1H), 8.08 (s, 1H), 7.87 – 7.71 (m, 2H), 7.64 – 7.55 (m, 2H), 7.44 – 7.35 (m, 3H).  $^{13}\text{C}$  NMR (101 MHz,  $\text{CDCl}_3$ )  $\delta$  146.54 (q,  $J = 33.4$  Hz), 141.65, 137.04, 131.98, 131.51, 130.40, 129.24, 128.65, 126.38, 124.80 (q,  $J = 3.1$  Hz), 124.15, 123.74, 123.61, 126.23 – 117.81 (m), 93.30, 88.24.  $^{19}\text{F}$  NMR (376 MHz,  $\text{CDCl}_3$ )  $\delta$  -62.96. ESI-HRMS:  $m/z$  calcd for  $\text{C}_{18}\text{H}_{11}\text{F}_3\text{N}[\text{M}+\text{H}]^+$ : 298.0838, found: 298.0841.

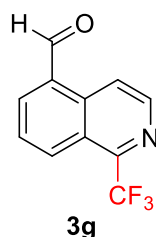

### 1-(Trifluoromethyl)isoquinoline-5-carbaldehyde (3g)

Yield: 36%, white solid.  $^1\text{H}$  NMR (400 MHz,  $\text{CDCl}_3$ )  $\delta$  10.39 (s, 1H), 9.30 (d,  $J = 5.9$  Hz, 1H), 8.77 (d,  $J = 5.9$  Hz, 1H), 8.57 (d,  $J = 9.4$  Hz, 1H), 8.29 (d,  $J = 7.9$  Hz, 1H), 7.91 (dd,  $J = 8.7, 7.1$  Hz, 1H).  $^{13}\text{C}$  NMR (101 MHz,  $\text{CDCl}_3$ )  $\delta$  192.32, 146.86 (q,  $J = 33.4$  Hz), 144.00, 140.31, 134.70, 131.21 (q,  $J = 3.3$  Hz), 131.07, 128.06, 124.80, 122.12 (q,  $J = 276.5$  Hz), 121.63.  $^{19}\text{F}$  NMR (376 MHz,  $\text{CDCl}_3$ )  $\delta$  -62.34. ESI-HRMS:  $m/z$  calcd for  $\text{C}_{11}\text{H}_7\text{F}_3\text{NO}[\text{M}+\text{H}]^+$ : 226.0474, found: 226.0475.

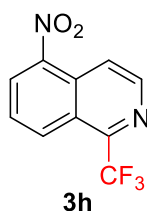

### 5-Nitro-1-(trifluoromethyl)isoquinoline (3h)

Yield: 64%, white solid.  $^1\text{H}$  NMR (400 MHz,  $\text{CDCl}_3$ )  $\delta$  8.82 (d,  $J = 6.0$  Hz, 1H), 8.66 (t,  $J = 7.4$  Hz, 2H), 8.58 (d,  $J = 7.7$  Hz, 1H), 7.87 (t,  $J = 8.2$  Hz, 1H).  $^{13}\text{C}$  NMR (101 MHz,  $\text{CDCl}_3$ )  $\delta$  147.32 (q,  $J = 33.8$  Hz), 145.81, 144.08, 131.30 (q,  $J = 3.4$  Hz), 129.69, 128.66, 127.54, 125.18, 121.89 (q,  $J = 276.6$  Hz), 119.63.  $^{19}\text{F}$  NMR (376 MHz,  $\text{CDCl}_3$ )  $\delta$  -62.36. ESI-HRMS:  $m/z$  calcd for  $\text{C}_{10}\text{H}_6\text{F}_3\text{N}_2\text{O}_2[\text{M}+\text{H}]^+$ : 243.0376, found: 243.0376.

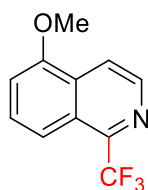

**3i**

### 5-Methoxy-1-(trifluoromethyl)isoquinoline (3i)

Yield: 68%, white solid.  $^1\text{H}$  NMR (400 MHz,  $\text{CDCl}_3$ )  $\delta$  8.73 (d,  $J = 8.7$  Hz, 1H), 7.78 (d,  $J = 8.6$  Hz, 1H), 7.72 – 7.65 (m, 2H), 6.93 (d,  $J = 7.7$  Hz, 1H), 4.01 (s, 3H).  $^{13}\text{C}$  NMR (101 MHz,  $\text{CDCl}_3$ )  $\delta$  155.08, 148.88 – 147.65 (m), 148.10, 133.27, 130.99, 122.02, 121.76 (q,  $J = 275.3$  Hz), 121.73, 115.89 (q,  $J = 2.2$  Hz), 105.93, 56.01.  $^{19}\text{F}$  NMR (376 MHz,  $\text{CDCl}_3$ )  $\delta$  -67.60. ESI-HRMS:  $m/z$  calcd for  $\text{C}_{11}\text{H}_9\text{F}_3\text{NO}[\text{M}+\text{H}]^+$ : 228.0630, found: 228.0631.

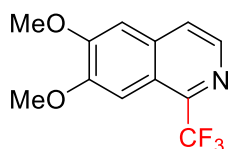

**3j**

### 6,7-Dimethoxy-1-(trifluoromethyl)isoquinoline (3j)

Yield: 76%, white solid.  $^1\text{H}$  NMR (400 MHz,  $\text{CDCl}_3$ )  $\delta$  8.36 (d,  $J = 5.5$  Hz, 1H), 7.61 (d,  $J = 5.5$  Hz, 1H), 7.39 (s, 1H), 7.06 (s, 1H), 3.98 (s, 6H).  $^{13}\text{C}$  NMR (101 MHz,  $\text{CDCl}_3$ )  $\delta$  153.39, 151.33, 143.62 (q,  $J = 32.7$  Hz), 139.60, 134.56, 123.13, 122.57 (q,  $J = 276.0$  Hz), 120.99, 105.13, 102.32 (q,  $J = 3.3$  Hz), 56.16, 56.05.  $^{19}\text{F}$  NMR (376 MHz,  $\text{CDCl}_3$ )  $\delta$  -63.49. ESI-HRMS:  $m/z$  calcd for  $\text{C}_{12}\text{H}_{11}\text{F}_3\text{NO}_2[\text{M}+\text{H}]^+$ : 258.0736, found: 258.0734.

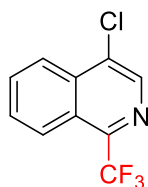

**3k**

### 4-Chloro-1-(trifluoromethyl)isoquinoline (3k)

Yield: 52%, colorless oil.  $^1\text{H}$  NMR (400 MHz,  $\text{CDCl}_3$ )  $\delta$  8.64 (s, 1H), 8.34 (dd,  $J = 8.4, 4.6$  Hz, 2H), 7.92 (t,  $J = 7.7$  Hz, 1H), 7.81 (t,  $J = 7.9$  Hz, 1H).  $^{13}\text{C}$  NMR (101

MHz, CDCl<sub>3</sub>)  $\delta$  145.19 (q,  $J = 33.7$  Hz), 139.87, 134.77, 132.42, 132.06, 129.80, 125.62, 125.11 (q,  $J = 3.1$  Hz), 124.43, 122.07 (q,  $J = 276.1$  Hz). <sup>19</sup>F NMR (376 MHz, CDCl<sub>3</sub>)  $\delta$  -62.68. ESI-HRMS:  $m/z$  calcd for C<sub>10</sub>H<sub>6</sub>ClF<sub>3</sub>N[M+H]<sup>+</sup>: 232.0135, found: 232.0134.

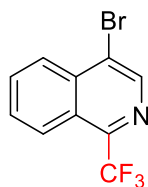

**3l**

#### 4-Bromo-1-(trifluoromethyl)isoquinoline (3l)

Yield: 56%, white solid. <sup>1</sup>H NMR (400 MHz, CDCl<sub>3</sub>)  $\delta$  8.77 (s, 1H), 8.29 (dd,  $J = 8.3$ , 4.6 Hz, 2H), 7.88 (t,  $J = 7.8$  Hz, 1H), 7.82 – 7.73 (m, 1H). <sup>13</sup>C NMR (101 MHz, CDCl<sub>3</sub>)  $\delta$  145.85 (q,  $J = 33.7$  Hz), 142.75, 135.96, 132.28, 129.84, 127.08, 125.84, 125.12 (q,  $J = 3.2$  Hz), 123.96, 122.10 (q,  $J = 276.3$  Hz). <sup>19</sup>F NMR (376 MHz, CDCl<sub>3</sub>)  $\delta$  -62.68. ESI-HRMS:  $m/z$  calcd for C<sub>10</sub>H<sub>6</sub>BrF<sub>3</sub>N[M+H]<sup>+</sup>: 275.9630, found: 275.9632.

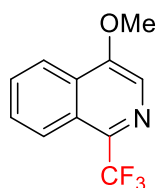

**3m**

#### 4-Methoxy-1-(trifluoromethyl)isoquinoline (3m)

Yield: 63%, white solid. <sup>1</sup>H NMR (400 MHz, CDCl<sub>3</sub>)  $\delta$  8.26 (d,  $J = 7.6$  Hz, 1H), 8.21 (d,  $J = 7.8$  Hz, 1H), 8.08 (s, 1H), 7.76 – 7.65 (m, 2H), 4.10 (s, 3H). <sup>13</sup>C NMR (101 MHz, CDCl<sub>3</sub>)  $\delta$  152.86, 138.87 (q,  $J = 33.3$  Hz), 129.96, 129.06, 129.01, 125.38, 124.17 (q,  $J = 3.1$  Hz), 122.53 (q,  $J = 275.1$  Hz), 122.01, 120.83, 56.43. <sup>19</sup>F NMR (376 MHz, CDCl<sub>3</sub>)  $\delta$  -62.44. ESI-HRMS:  $m/z$  calcd for C<sub>11</sub>H<sub>9</sub>F<sub>3</sub>NO[M+H]<sup>+</sup>: 228.0631, found: 228.0617.

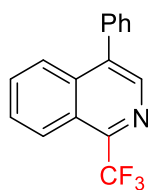

**3n**

#### 4-Phenyl-1-(trifluoromethyl)isoquinoline (3n)

Yield: 65%, colorless oil.  $^1\text{H}$  NMR (400 MHz,  $\text{CDCl}_3$ )  $\delta$  8.55 (s, 1H), 8.42 – 8.33 (m, 1H), 8.01 (dq,  $J = 6.9, 3.4$  Hz, 1H), 7.74 (dt,  $J = 6.6, 3.4$  Hz, 2H), 7.61 – 7.45 (m, 5H).  $^{13}\text{C}$  NMR (101 MHz,  $\text{CDCl}_3$ )  $\delta$  145.71 (q,  $J = 33.1$  Hz), 140.72, 137.38, 136.15, 135.74, 131.03, 130.18, 128.89, 128.70, 128.69, 126.05, 124.86 (q,  $J = 3.2$  Hz), 124.68, 122.48 (q,  $J = 276.2$  Hz).  $^{19}\text{F}$  NMR (376 MHz,  $\text{CDCl}_3$ )  $\delta$  -62.68. ESI-HRMS:  $m/z$  calcd for  $\text{C}_{16}\text{H}_{11}\text{F}_3\text{N}[\text{M}+\text{H}]^+$ : 274.0838, found: 274.0839.

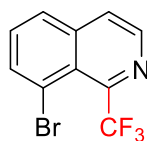

3o

#### 8-Bromo-1-(trifluoromethyl)isoquinoline (3o)

Yield: 54%, white solid.  $^1\text{H}$  NMR (400 MHz,  $\text{CDCl}_3$ )  $\delta$  8.58 (d,  $J = 5.4$  Hz, 1H), 8.08 (d,  $J = 7.5$  Hz, 1H), 7.86 (d,  $J = 8.2$  Hz, 1H), 7.81 (d,  $J = 5.4$  Hz, 1H), 7.51 (t,  $J = 7.8$  Hz, 1H).  $^{13}\text{C}$  NMR (101 MHz,  $\text{CDCl}_3$ )  $\delta$  144.81 (q,  $J = 34.5$  Hz), 140.27, 140.12, 137.23, 130.74, 128.16, 125.36, 125.27, 121.69 (q,  $J = 275.0$  Hz), 117.47.  $^{19}\text{F}$  NMR (376 MHz,  $\text{CDCl}_3$ )  $\delta$  -55.97. ESI-HRMS:  $m/z$  calcd for  $\text{C}_{10}\text{H}_6\text{BrF}_3\text{N}[\text{M}+\text{H}]^+$ : 275.9630, found: 275.9630.

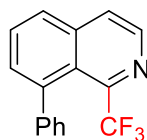

3p

#### 8-Phenyl-1-(trifluoromethyl)isoquinoline (3p)

Yield: 40%, colorless oil.  $^1\text{H}$  NMR (400 MHz,  $\text{CDCl}_3$ )  $\delta$  8.64 (d,  $J = 5.3$  Hz, 1H), 7.96 – 7.86 (m, 2H), 7.78 – 7.70 (m, 1H), 7.57 (dd,  $J = 7.1, 1.3$  Hz, 1H), 7.42 (dp,  $J = 3.8, 2.1$  Hz, 3H), 7.36 (dd,  $J = 6.7, 3.0$  Hz, 2H).  $^{13}\text{C}$  NMR (101 MHz,  $\text{CDCl}_3$ )  $\delta$  146.29 (q,  $J = 34.3$  Hz), 142.11 (q,  $J = 2.7$  Hz), 140.16, 138.76, 133.37, 129.84, 129.68 (q,  $J = 1.9$  Hz), 127.73, 127.43, 124.51, 123.94, 121.37 (q,  $J = 275.9$  Hz).  $^{19}\text{F}$  NMR (376 MHz,  $\text{CDCl}_3$ )  $\delta$  -58.86. ESI-HRMS:  $m/z$  calcd for  $\text{C}_{16}\text{H}_{11}\text{F}_3\text{N}[\text{M}+\text{H}]^+$ : 274.0838, found: 274.0840.



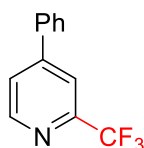

**3q**

**4-Phenyl-2-(trifluoromethyl)pyridine (3q)**

Yield: 68%, white solid.  $^1\text{H}$  NMR (400 MHz,  $\text{CDCl}_3$ )  $\delta$  8.77 (d,  $J = 5.1$  Hz, 1H), 7.90 (s, 1H), 7.70 (d,  $J = 5.1$  Hz, 1H), 7.70 – 7.63 (m, 2H), 7.56 – 7.48 (m, 3H).  $^{13}\text{C}$  NMR (101 MHz,  $\text{CDCl}_3$ )  $\delta$  150.58, 150.41, 148.98 (q,  $J = 34.3$  Hz), 136.99, 130.01, 129.52, 127.23, 124.29, 121.77 (q,  $J = 274.4$  Hz), 118.60 (q,  $J = 2.8$  Hz).  $^{19}\text{F}$  NMR (376 MHz,  $\text{CDCl}_3$ )  $\delta$  -67.98. ESI-HRMS:  $m/z$  calcd for  $\text{C}_{12}\text{H}_9\text{F}_3\text{N}[\text{M}+\text{H}]^+$ : 224.0682, found: 224.0672.

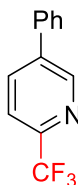

**3r**

**5-Phenyl-2-(trifluoromethyl)pyridine (3r)**

Yield: 52%, white solid.  $^1\text{H}$  NMR (400 MHz,  $\text{CDCl}_3$ )  $\delta$  8.94 (s, 1H), 8.04 (d,  $J = 9.8$  Hz, 1H), 7.76 (d,  $J = 8.1$  Hz, 1H), 7.61 (d,  $J = 6.9$  Hz, 2H), 7.50 (dt,  $J = 14.0, 7.0$  Hz, 3H).  $^{13}\text{C}$  NMR (101 MHz,  $\text{CDCl}_3$ )  $\delta$  148.59, 146.90 (q,  $J = 34.8$  Hz), 139.61, 136.48, 135.62, 129.46, 129.14, 127.46, 121.83 (q,  $J = 273.8$  Hz), 120.57 (q,  $J = 2.7$  Hz).  $^{19}\text{F}$  NMR (376 MHz,  $\text{CDCl}_3$ )  $\delta$  -67.69. ESI-HRMS:  $m/z$  calcd for  $\text{C}_{12}\text{H}_9\text{F}_3\text{N}[\text{M}+\text{H}]^+$ : 224.0682, found: 224.0682.

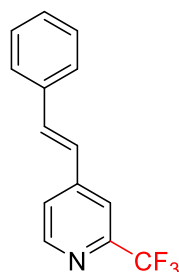

**3s**

**(E)-4-Styryl-2-(trifluoromethyl)pyridine (3s)**

Yield: 61%, white solid.  $^1\text{H}$  NMR (400 MHz,  $\text{CDCl}_3$ )  $\delta$  8.68 (d,  $J = 5.1$  Hz, 1H), 7.76

(s, 1H), 7.56 (d,  $J = 7.1$  Hz, 2H), 7.53 (d,  $J = 4.4$  Hz, 1H), 7.45 – 7.37 (m, 3H), 7.36 (d,  $J = 3.5$  Hz, 1H), 7.07 (d,  $J = 16.3$  Hz, 1H).  $^{13}\text{C}$  NMR (101 MHz,  $\text{CDCl}_3$ )  $\delta$  150.50, 148.84 (q,  $J = 34.1$  Hz), 146.62, 135.63, 135.11, 129.45, 129.08, 127.35, 124.73, 123.44, 121.76 (q,  $J = 272.6$  Hz), 117.68, 117.49 (q,  $J = 2.7$  Hz).  $^{19}\text{F}$  NMR (376 MHz,  $\text{CDCl}_3$ )  $\delta$  -68.05. ESI-HRMS:  $m/z$  calcd for  $\text{C}_{14}\text{H}_{11}\text{F}_3\text{N}[\text{M}+\text{H}]^+$ : 250.0838, found: 250.0852.

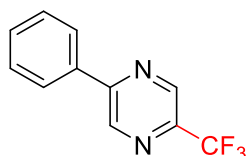

**3t**

### 2-Phenyl-5-(trifluoromethyl)pyrazine (3t)

Yield: 42%, white solid.  $^1\text{H}$  NMR (400 MHz,  $\text{CDCl}_3$ )  $\delta$  9.12 (s, 1H), 8.99 (s, 1H), 8.08 (dd,  $J = 6.7, 2.9$  Hz, 2H), 7.60 – 7.53 (m, 3H).  $^{13}\text{C}$  NMR (101 MHz,  $\text{CDCl}_3$ )  $\delta$  155.64, 141.78 (q,  $J = 35.7$  Hz), 141.55, 141.17 (q,  $J = 3.2$  Hz), 135.13, 131.21, 129.44, 127.57, 121.56 (q,  $J = 274.0$  Hz).  $^{19}\text{F}$  NMR (376 MHz,  $\text{CDCl}_3$ )  $\delta$  -67.39. ESI-HRMS:  $m/z$  calcd for  $\text{C}_{11}\text{H}_8\text{F}_3\text{N}_2[\text{M}+\text{H}]^+$ : 225.0634, found: 225.0632.

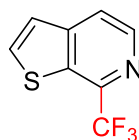

**3u**

### 7-(Trifluoromethyl)thieno[2,3-c]pyridine (3u)

Yield: 43%, white solid.  $^1\text{H}$  NMR (400 MHz,  $\text{CDCl}_3$ )  $\delta$  8.60 (d,  $J = 5.3$  Hz, 1H), 7.88 (d,  $J = 5.3$  Hz, 1H), 7.83 (d,  $J = 5.5$  Hz, 1H), 7.47 (d,  $J = 5.5$  Hz, 1H).  $^{13}\text{C}$  NMR (101 MHz,  $\text{CDCl}_3$ )  $\delta$  147.59, 142.85 (q,  $J = 36.1$  Hz), 142.31, 133.89, 132.59, 121.91 (q,  $J = 274.9$  Hz), 123.07, 120.75.  $^{19}\text{F}$  NMR (376 MHz,  $\text{CDCl}_3$ )  $\delta$  -66.27. ESI-HRMS:  $m/z$  calcd for  $\text{C}_8\text{H}_5\text{F}_3\text{NS}[\text{M}+\text{H}]^+$ : 204.0089, found: 204.0088.

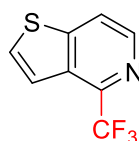

**3v**

#### 4-(Trifluoromethyl)thieno[3,2-c]pyridine (3v)

Yield: 55%, white solid.  $^1\text{H}$  NMR (400 MHz,  $\text{CDCl}_3$ )  $\delta$  8.52 (d,  $J = 5.5$  Hz, 1H), 7.98 (d,  $J = 5.5$  Hz, 1H), 7.66 (s, 2H).  $^{13}\text{C}$  NMR (101 MHz,  $\text{CDCl}_3$ )  $\delta$  149.61, 142.90 (q,  $J = 35.1$  Hz), 141.27, 132.15, 129.97, 122.19 (q,  $J = 275.0$  Hz), 121.42 (q,  $J = 2.7$  Hz), 120.46.  $^{19}\text{F}$  NMR (376 MHz,  $\text{CDCl}_3$ )  $\delta$  -65.18. ESI-HRMS:  $m/z$  calcd for  $\text{C}_8\text{H}_5\text{F}_3\text{NS}[\text{M}+\text{H}]^+$ : 204.0089, found: 204.0092.

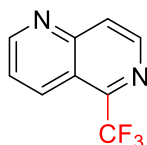

3v

#### 5-(Trifluoromethyl)-1,6-naphthyridine (3w)

Yield: 41%, white solid.  $^1\text{H}$  NMR (400 MHz,  $\text{CDCl}_3$ )  $\delta$  9.16 (d,  $J = 4.2$  Hz, 1H), 8.79 (d,  $J = 5.8$  Hz, 1H), 8.60 (d,  $J = 9.4$  Hz, 1H), 8.12 (d,  $J = 5.8$  Hz, 1H), 7.63 (dd,  $J = 8.7, 4.2$  Hz, 1H).  $^{13}\text{C}$  NMR (101 MHz,  $\text{CDCl}_3$ )  $\delta$  155.41, 151.18, 147.24 (q,  $J = 33.8$  Hz), 144.77, 133.00 (q,  $J = 3.0$  Hz), 126.15, 123.69, 121.81 (q,  $J = 276.6$  Hz), 120.50.  $^{19}\text{F}$  NMR (376 MHz,  $\text{CDCl}_3$ )  $\delta$  -62.56. ESI-HRMS:  $m/z$  calcd for  $\text{C}_9\text{H}_6\text{F}_3\text{N}_2[\text{M}+\text{H}]^+$ : 199.0478, found: 199.0477.

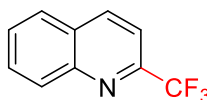

3w

#### 2-(Trifluoromethyl)quinoline (3x)

Yield: 47%, white solid.  $^1\text{H}$  NMR (400 MHz,  $\text{CDCl}_3$ )  $\delta$  8.35 (d,  $J = 8.5$  Hz, 1H), 8.23 (d,  $J = 8.5$  Hz, 1H), 7.90 (d,  $J = 8.2$  Hz, 1H), 7.82 (ddd,  $J = 8.4, 6.9, 1.4$  Hz, 1H), 7.73 (d,  $J = 8.5$  Hz, 1H), 7.67 (t,  $J = 7.6$  Hz, 1H).  $^{13}\text{C}$  NMR (101 MHz,  $\text{CDCl}_3$ )  $\delta$  147.96 (q,  $J = 34.6$  Hz), 147.22, 138.24, 130.92, 130.14, 128.93, 128.70, 127.79, 121.69 (q,  $J = 275.1$  Hz), 116.84 (q,  $J = 2.1$  Hz).  $^{19}\text{F}$  NMR (376 MHz,  $\text{CDCl}_3$ )  $\delta$  -67.45. ESI-HRMS:  $m/z$  calcd for  $\text{C}_{10}\text{H}_6\text{F}_3\text{N}[\text{M}+\text{H}]^+$ : 198.0525, found: 198.0523.

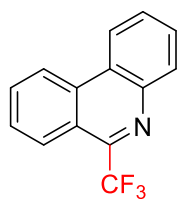

**3y**

### 6-(Trifluoromethyl)phenanthridine (3y)

Yield: 32%, white solid.  $^1\text{H}$  NMR (400 MHz,  $\text{CDCl}_3$ )  $\delta$  8.64 (d,  $J = 8.4$  Hz, 1H), 8.55 (d,  $J = 9.5$  Hz, 1H), 8.36 (d,  $J = 8.4$  Hz, 1H), 8.27 (d,  $J = 7.5$  Hz, 1H), 7.88 (t,  $J = 8.3$  Hz, 1H), 7.83 – 7.68 (m, 3H).  $^{13}\text{C}$  NMR (101 MHz,  $\text{CDCl}_3$ )  $\delta$  146.56 (q,  $J = 32.7$  Hz), 141.79, 134.00, 131.44, 131.17, 129.41, 129.29, 128.13, 125.97 (q,  $J = 3.1$  Hz), 125.16, 122.59, 122.13, 122.05 (q,  $J = 277.2$  Hz), 121.81.  $^{19}\text{F}$  NMR (376 MHz,  $\text{CDCl}_3$ )  $\delta$  -63.46. ESI-HRMS:  $m/z$  calcd for  $\text{C}_{14}\text{H}_9\text{F}_3\text{N}[\text{M}+\text{H}]^+$ : 248.0682, found: 248.0678.

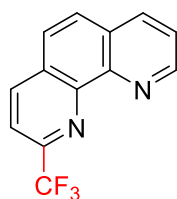

**3z**

### 2-(Trifluoromethyl)-1,10-phenanthroline (3z)

Yield: 35%, white solid.  $^1\text{H}$  NMR (400 MHz,  $\text{CDCl}_3$ )  $\delta$  9.25 (dd,  $J = 4.4, 1.7$  Hz, 1H), 8.41 (d,  $J = 8.3$  Hz, 1H), 8.27 (dd,  $J = 8.1, 1.8$  Hz, 1H), 7.96 (d,  $J = 8.3$  Hz, 1H), 7.88 (d,  $J = 8.9$  Hz, 1H), 7.82 (d,  $J = 8.8$  Hz, 1H), 7.68 (dd,  $J = 8.1, 4.4$  Hz, 1H).  $^{13}\text{C}$  NMR (101 MHz,  $\text{CDCl}_3$ )  $\delta$  151.17, 147.91 (q,  $J = 35.1$  Hz), 145.82, 145.69, 138.05, 136.38, 129.97, 129.30, 128.99, 125.93, 123.84, 121.77 (q,  $J = 275.3$  Hz), 119.22 (q,  $J = 2.2$  Hz).  $^{19}\text{F}$  NMR (376 MHz,  $\text{CDCl}_3$ )  $\delta$  -66.53. ESI-HRMS:  $m/z$  calcd for  $\text{C}_{13}\text{H}_8\text{F}_3\text{N}_2[\text{M}+\text{H}]^+$ : 249.0634, found: 249.0679.

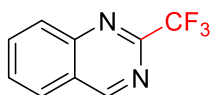

**3π**

### 2-(Trifluoromethyl)quinazoline (3π)

Yield: 25%, white solid. Yield: 25%, white solid.  $^1\text{H}$  NMR (400 MHz,  $\text{CDCl}_3$ )  $\delta$  9.54 (s, 1H), 8.20 (d,  $J = 8.9$  Hz, 1H), 8.09 – 8.02 (m, 2H), 7.83 (t,  $J = 7.6$  Hz, 1H).  $^{13}\text{C}$  NMR (101 MHz,  $\text{CDCl}_3$ )  $\delta$  161.77, 152.95 (q,  $J = 36.4$  Hz), 149.73, 135.66, 130.14, 129.22, 127.46, 125.27, 120.08 (q,  $J = 275.5$  Hz).  $^{19}\text{F}$  NMR (376 MHz,  $\text{CDCl}_3$ )  $\delta$  -69.87. ESI-HRMS:  $m/z$  calcd for  $\text{C}_9\text{H}_6\text{F}_3\text{N}_2[\text{M}+\text{H}]^+$ : 199.0478, found: 199.0452.

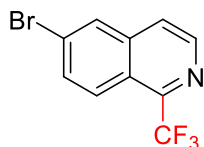

**3λ**

### 6-Bromo-1-(trifluoromethyl)isoquinoline (3λ)

Yield: 66%, white solid.  $^1\text{H}$  NMR (400 MHz,  $\text{CDCl}_3$ )  $\delta$  8.59 (d,  $J = 5.6$  Hz, 1H), 8.13 (d,  $J = 9.1$  Hz, 1H), 8.07 (d,  $J = 1.9$  Hz, 1H), 7.80 – 7.65 (m, 2H).  $^{13}\text{C}$  NMR (101 MHz,  $\text{CDCl}_3$ )  $\delta$  146.78 (q,  $J = 33.4$  Hz), 141.95, 138.24, 132.55, 129.72, 126.34 (q,  $J = 3.1$  Hz), 126.04, 123.47, 123.14, 122.05 (q,  $J = 276.4$  Hz).  $^{19}\text{F}$  NMR (376 MHz,  $\text{CDCl}_3$ )  $\delta$  -63.00. ESI-HRMS:  $m/z$  calcd for  $\text{C}_{10}\text{H}_6\text{BrF}_3\text{N}[\text{M}+\text{H}]^+$ : 275.9630, found: 275.9632.

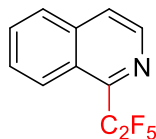

**4a**

### 1-(Perfluoroethyl)isoquinoline (4a)

Yield: 69%, colorless oil.  $^1\text{H}$  NMR (400 MHz,  $\text{CDCl}_3$ )  $\delta$  8.61 (d,  $J = 5.6$  Hz, 1H), 8.39 (d,  $J = 8.6$  Hz, 1H), 7.92 (d,  $J = 8.1$  Hz, 1H), 7.83 (d,  $J = 5.5$  Hz, 1H), 7.79 – 7.74 (m, 1H), 7.70 (ddd,  $J = 8.3, 6.9, 1.4$  Hz, 1H).  $^{13}\text{C}$  NMR (101 MHz,  $\text{CDCl}_3$ )  $\delta$  146.39 (t,  $J = 25.3$  Hz), 140.84, 137.37, 130.87, 128.92, 127.87, 125.97, 124.92 (t,  $J = 6.2$  Hz), 124.60, 119.37 (qt,  $J = 286.7, 35.9$  Hz), 113.65 (tq,  $J = 255.4, 36.9$  Hz).  $^{19}\text{F}$  NMR (376 MHz,  $\text{CDCl}_3$ )  $\delta$  -81.18 (s, 3F), -107.63 (s, 2F). ESI-HRMS:  $m/z$  calcd for  $\text{C}_{11}\text{H}_7\text{F}_5\text{N}[\text{M}+\text{H}]^+$ : 248.0493, found: 248.0491.

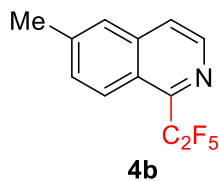

#### 6-Methyl-1-(perfluoroethyl)isoquinoline (4b)

Yield: 74%, white solid.  $^1\text{H}$  NMR (400 MHz,  $\text{CDCl}_3$ )  $\delta$  8.55 (d,  $J = 5.6$  Hz, 1H), 8.26 (d,  $J = 8.9$  Hz, 1H), 7.72 (d,  $J = 5.5$  Hz, 1H), 7.66 (s, 1H), 7.51 (dd,  $J = 8.9, 1.7$  Hz, 1H), 2.55 (s, 3H).  $^{13}\text{C}$  NMR (101 MHz,  $\text{CDCl}_3$ )  $\delta$  145.98 (t,  $J = 25.3$  Hz), 141.54, 140.86, 137.76, 131.27, 126.63, 124.64 (t,  $J = 6.1$  Hz), 124.36, 124.08, 119.37 (qt,  $J = 286.8, 36.1$  Hz), 113.62 (tq,  $J = 255.6, 37.1$  Hz), 21.93.  $^{19}\text{F}$  NMR (376 MHz,  $\text{CDCl}_3$ )  $\delta$  -81.30 (s, 3F), -107.92 (s, 2F). ESI-HRMS:  $m/z$  calcd for  $\text{C}_{12}\text{H}_9\text{F}_5\text{N}[\text{M}+\text{H}]^+$ : 262.0650, found: 262.0647.

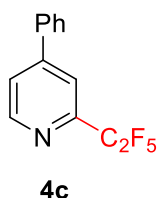

#### 4-Phenyl-2-(perfluoroethyl)pyridine (4c)

Yield: 72%, white solid.  $^1\text{H}$  NMR (400 MHz,  $\text{CDCl}_3$ )  $\delta$  8.79 (d,  $J = 5.1$  Hz, 1H), 7.91 (s, 1H), 7.69 (dd,  $J = 5.1, 1.5$  Hz, 1H), 7.65 (dt,  $J = 8.5, 2.3$  Hz, 2H), 7.57 – 7.44 (m, 3H).  $^{13}\text{C}$  NMR (101 MHz,  $\text{CDCl}_3$ )  $\delta$  150.52, 150.31, 148.43 (t,  $J = 25.2$  Hz), 136.90, 129.99, 129.48, 127.19, 124.22, 120.00 (t,  $J = 4.4$  Hz), 119.10 (qt,  $J = 286.6, 37.7$  Hz), 111.48 (tq,  $J = 254.8, 37.9$  Hz).  $^{19}\text{F}$  NMR (376 MHz,  $\text{CDCl}_3$ )  $\delta$  -83.10 (s, 3F), -117.29 (s, 2F). ESI-HRMS:  $m/z$  calcd for  $\text{C}_{13}\text{H}_9\text{F}_5\text{N}[\text{M}+\text{H}]^+$ : 274.0650, found: 274.0647.

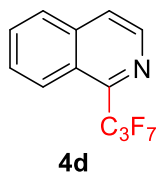

#### 1-(Perfluoropropyl)isoquinoline (4d)

Yield: 67%, colorless oil.  $^1\text{H}$  NMR (400 MHz,  $\text{CDCl}_3$ )  $\delta$  8.65 (d,  $J = 5.5$  Hz, 1H), 8.36 (d,  $J = 8.5$  Hz, 1H), 7.91 (d,  $J = 8.1$  Hz, 1H), 7.84 (d,  $J = 5.5$  Hz, 1H), 7.75 (t,  $J = 7.1$  Hz, 1H), 7.69 (ddd,  $J = 8.3, 6.9, 1.3$  Hz, 1H).  $^{13}\text{C}$  NMR (101 MHz,  $\text{CDCl}_3$ )  $\delta$

146.11 (t,  $J = 23.8$  Hz), 141.10, 137.45, 130.80, 128.96, 127.86, 126.46, 125.05 (tt,  $J = 6.9, 2.4$  Hz), 124.73, 118.20 (qt,  $J = 287.6, 34.2$  Hz), 114.97 (tt,  $J = 255.8, 31.1$  Hz), 109.67 (tq,  $J = 267.4, 37.8$  Hz).  $^{19}\text{F}$  NMR (376 MHz,  $\text{CDCl}_3$ )  $\delta$  -79.85 (t,  $J = 9.6$  Hz, 3F), -107.05 (qd,  $J = 9.6, 4.7$  Hz, 2F), -124.80 – -124.88 (m, 2F). ESI-HRMS:  $m/z$  calcd for  $\text{C}_{12}\text{H}_7\text{F}_7\text{N}[\text{M}+\text{H}]^+$ : 298.0461, found: 298.0458.

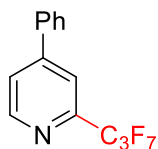

**4e**

#### **4-Phenyl-2-(perfluoropropyl)pyridine (4e)**

Yield: 71%, white solid.  $^1\text{H}$  NMR (400 MHz,  $\text{CDCl}_3$ )  $\delta$  8.80 (d,  $J = 5.1$  Hz, 1H), 7.90 (s, 1H), 7.70 (d,  $J = 5.0$  Hz, 1H), 7.66 (dt,  $J = 8.6, 2.3$  Hz, 2H), 7.56 – 7.48 (m, 3H).  $^{13}\text{C}$  NMR (101 MHz,  $\text{CDCl}_3$ )  $\delta$  150.53, 150.26, 148.43 (t,  $J = 25.2$  Hz), 136.93, 130.02, 129.51, 127.23, 124.26, 120.38 (t,  $J = 4.8$  Hz), 119.95 – 110.98 (m), 113.09 (tt,  $J = 256.6, 30.3$  Hz), 109.74 – 106.16 (m).  $^{19}\text{F}$  NMR (376 MHz,  $\text{CDCl}_3$ )  $\delta$  -80.27 (t,  $J = 9.4$  Hz, 3F), -114.91 (q,  $J = 9.3$  Hz, 2F), -126.35 (s, 2F). ESI-HRMS:  $m/z$  calcd for  $\text{C}_{14}\text{H}_9\text{F}_7\text{N}[\text{M}+\text{H}]^+$ : 324.0618, found: 324.0619.

### **8. $^1\text{H}$ , $^{13}\text{C}$ NMR and $^{19}\text{F}$ NMR spectra of the products**

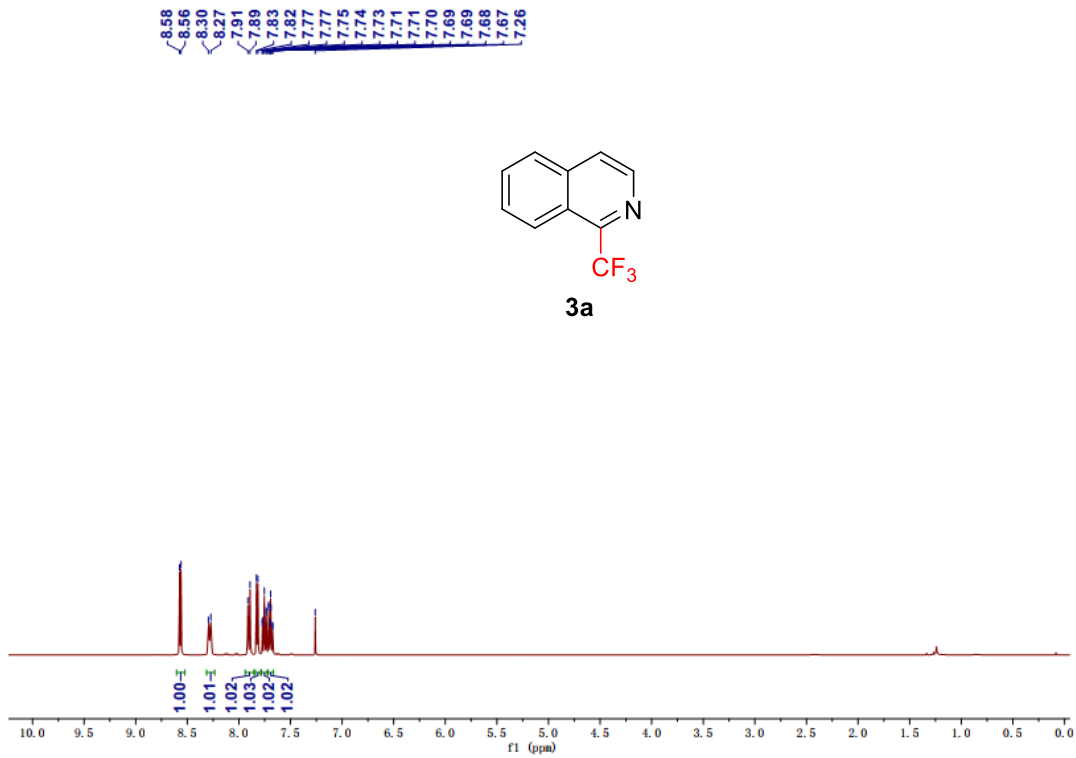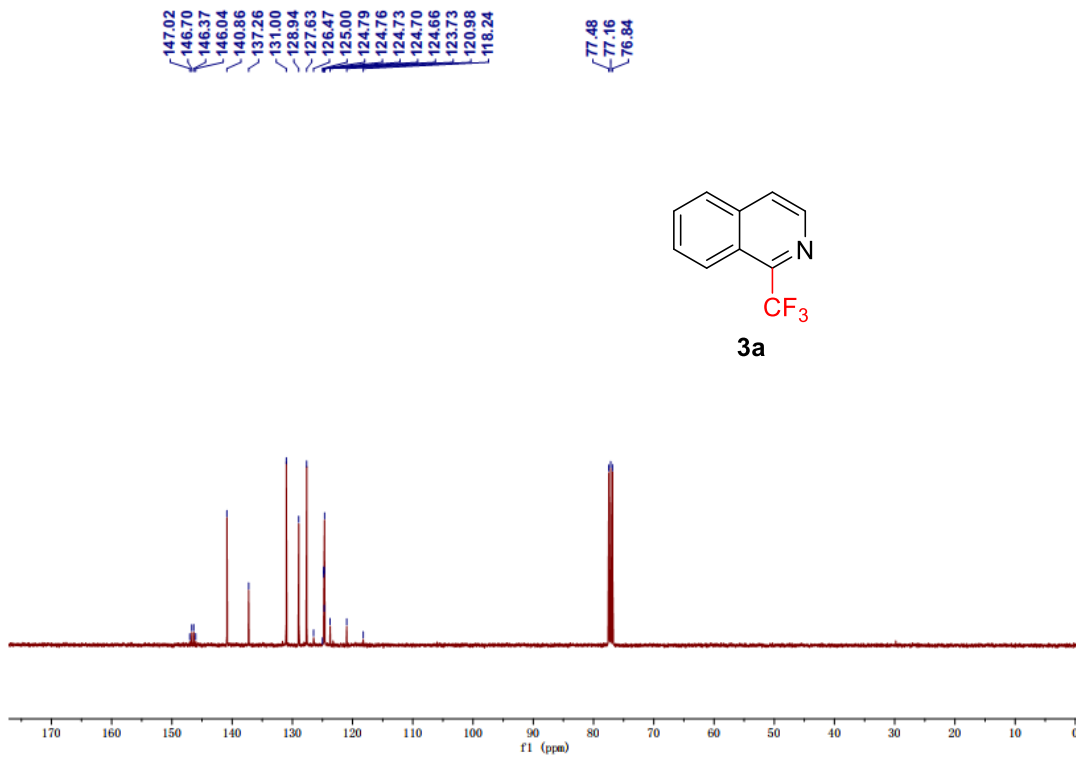



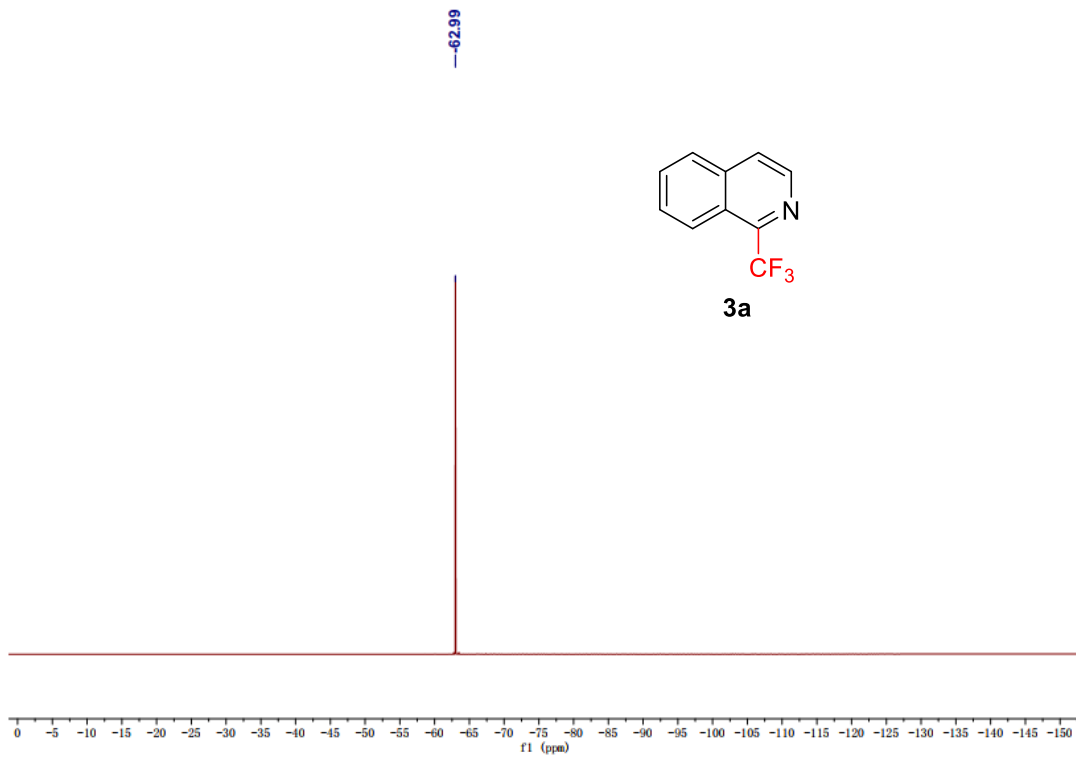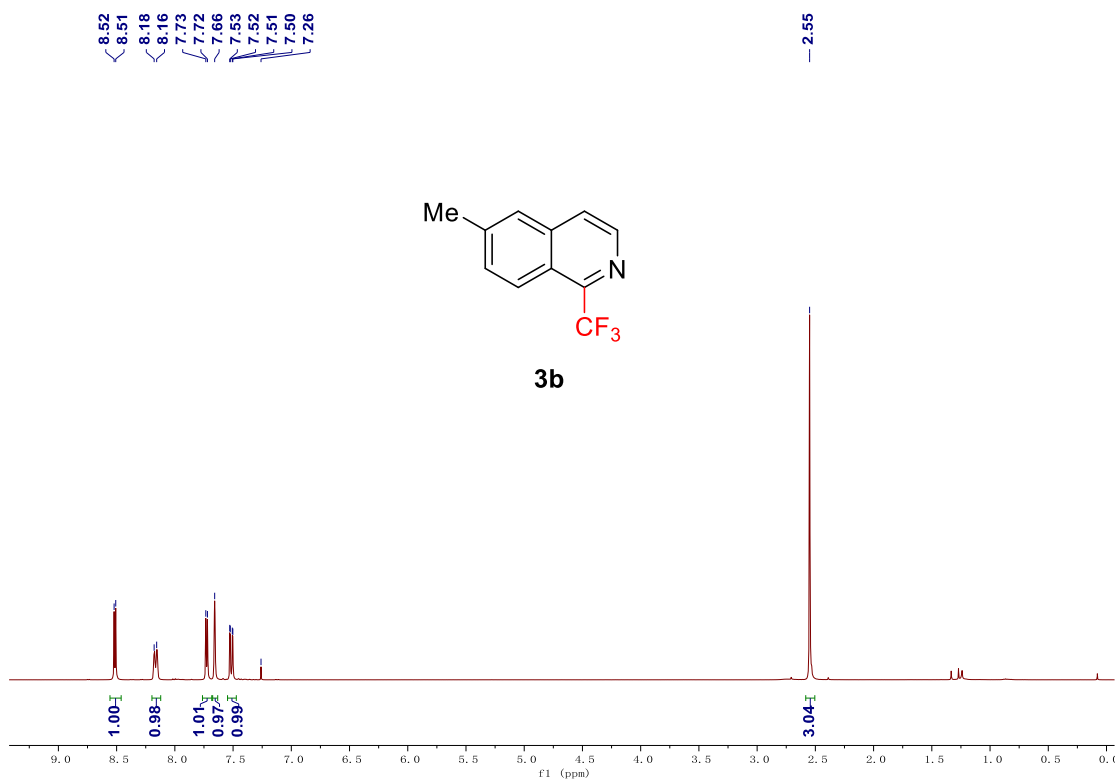

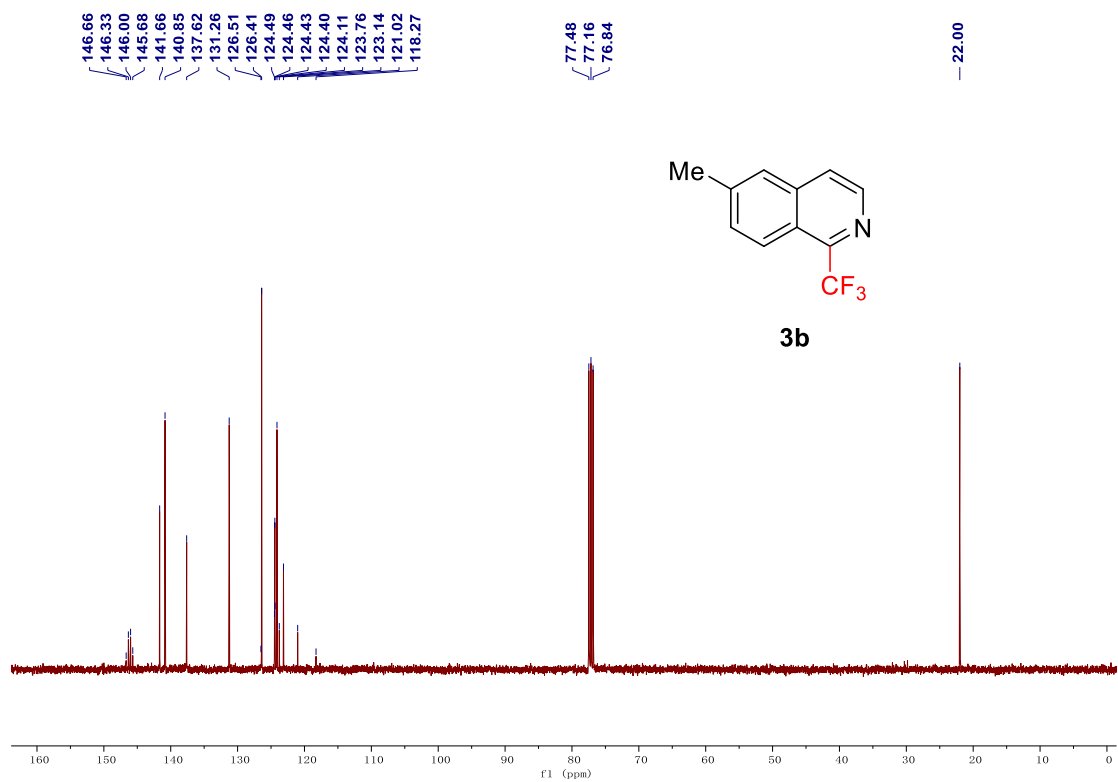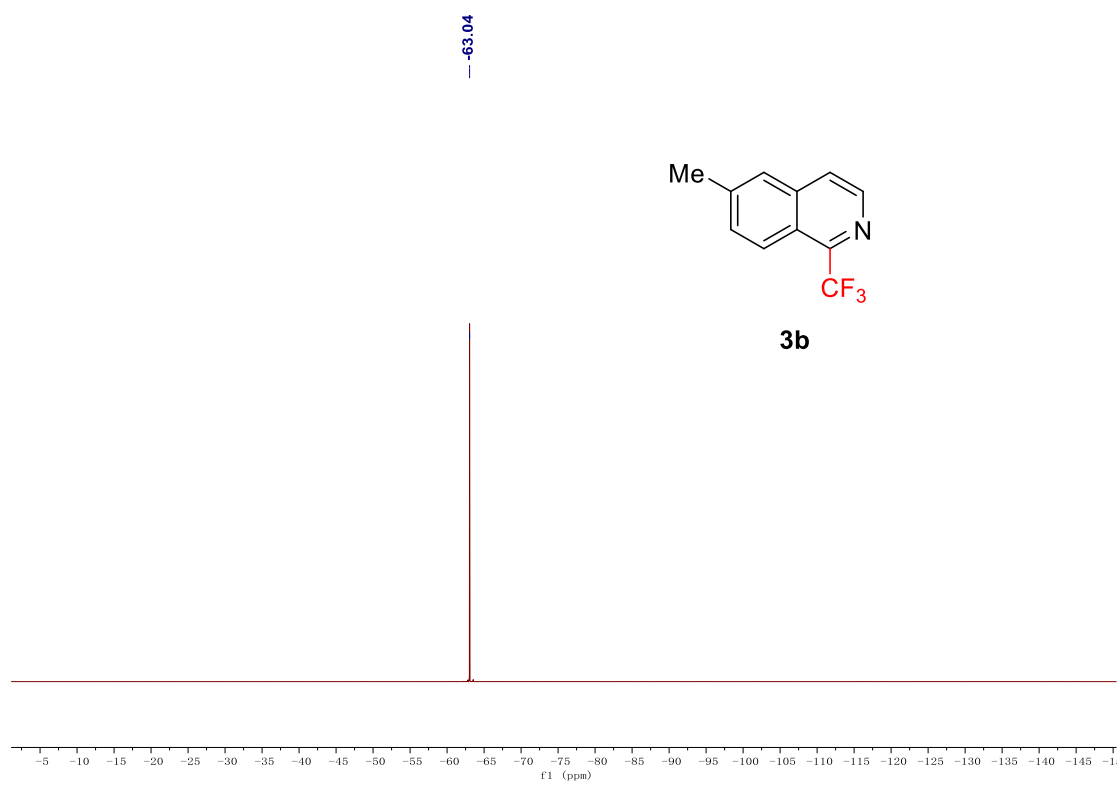

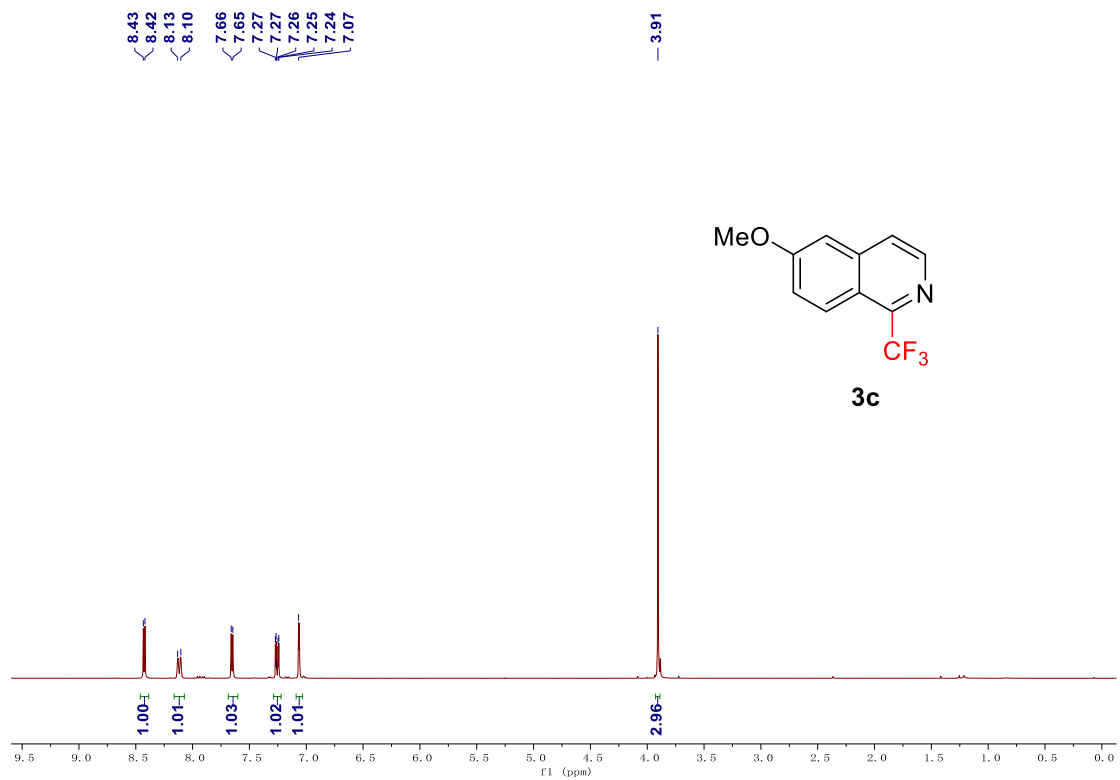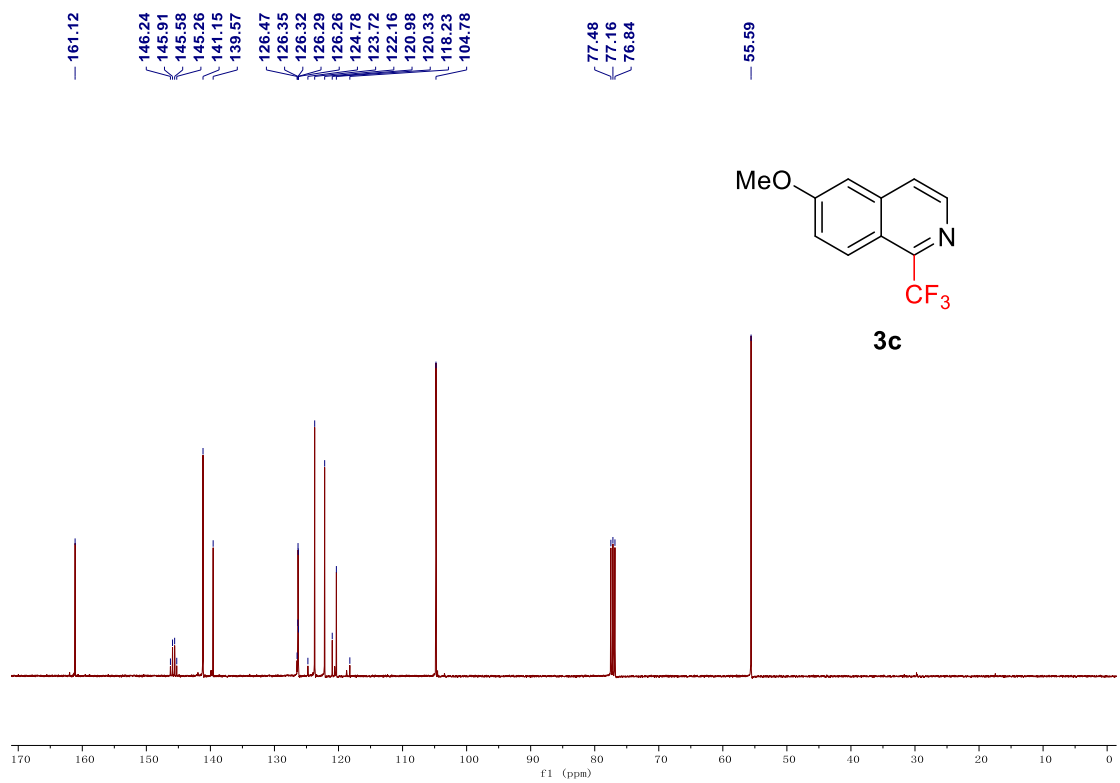

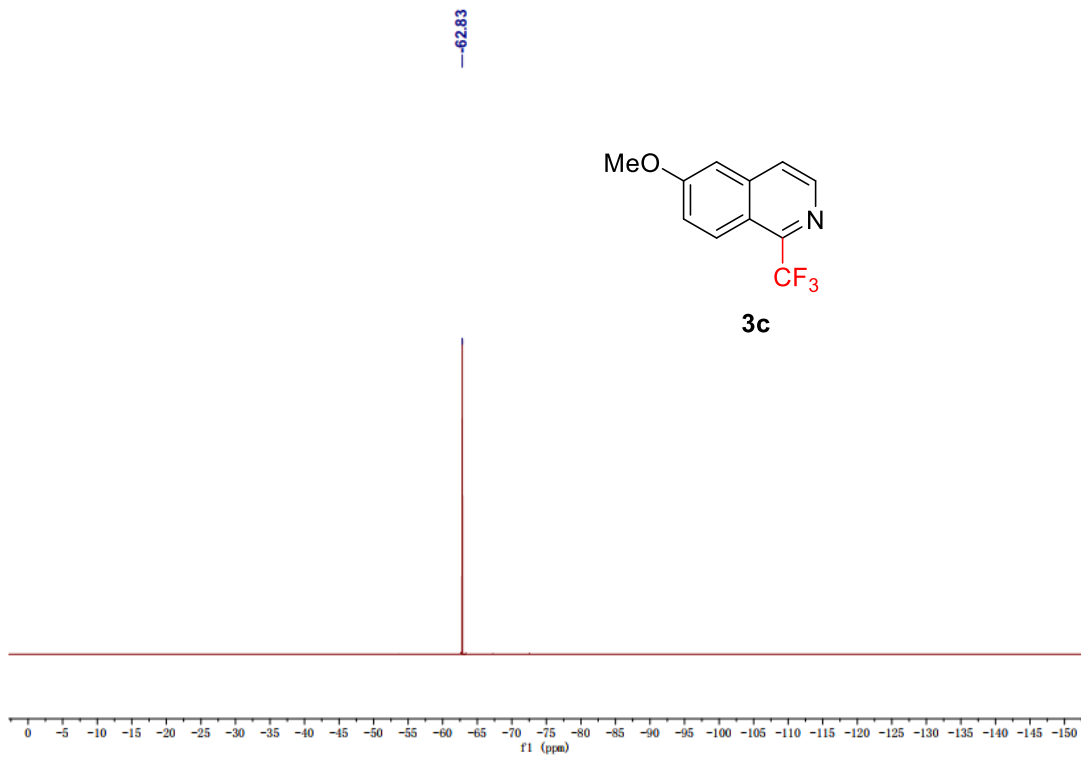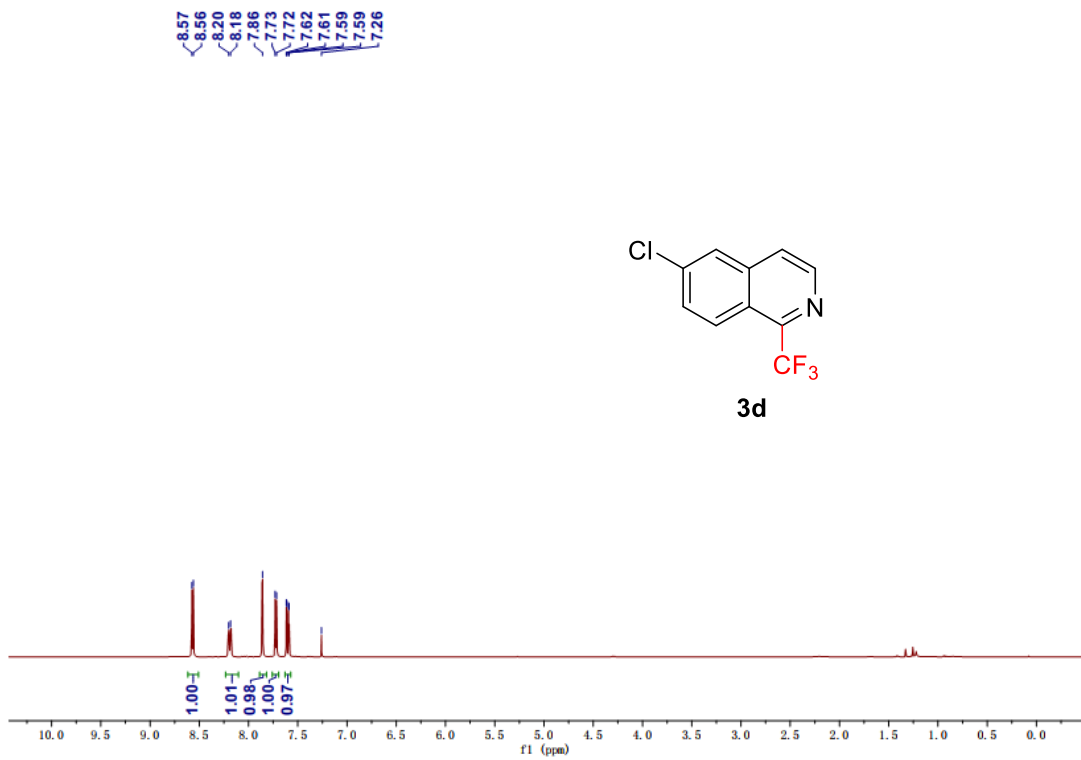

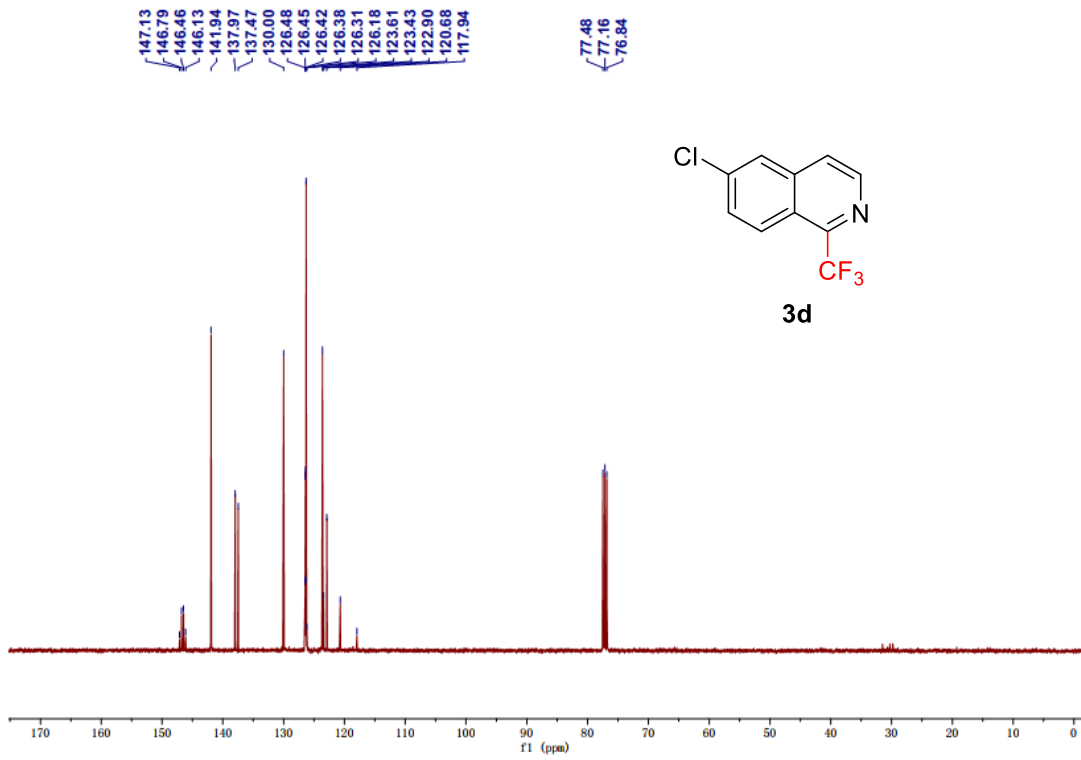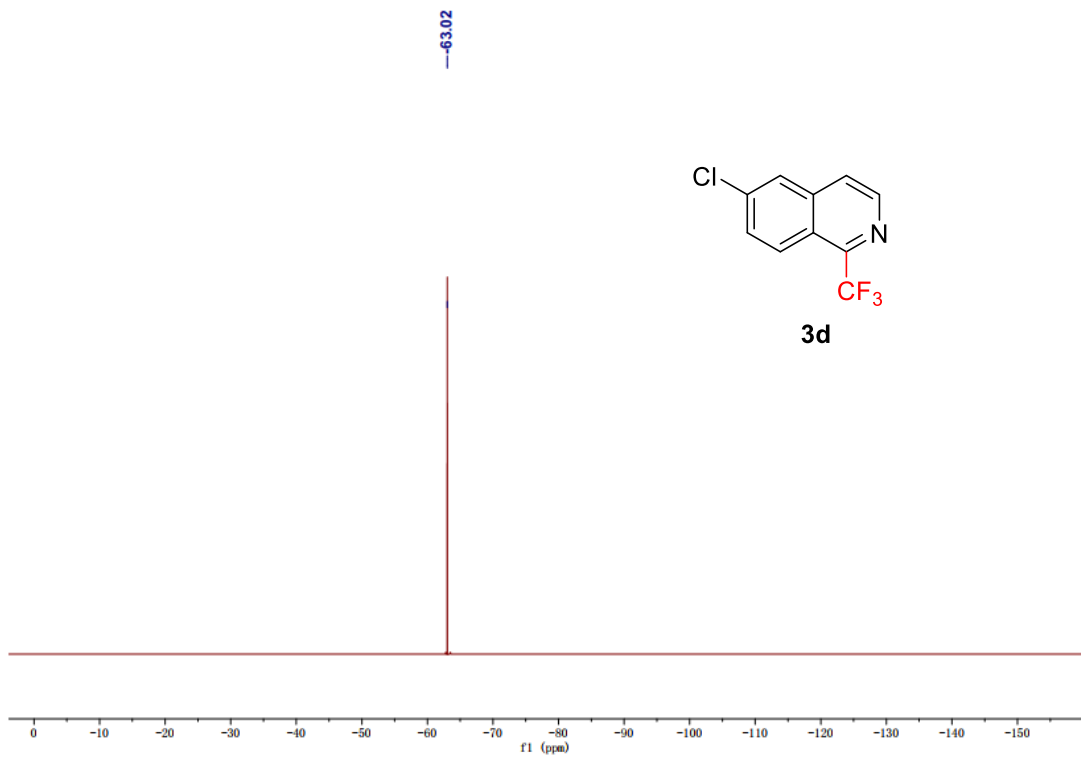

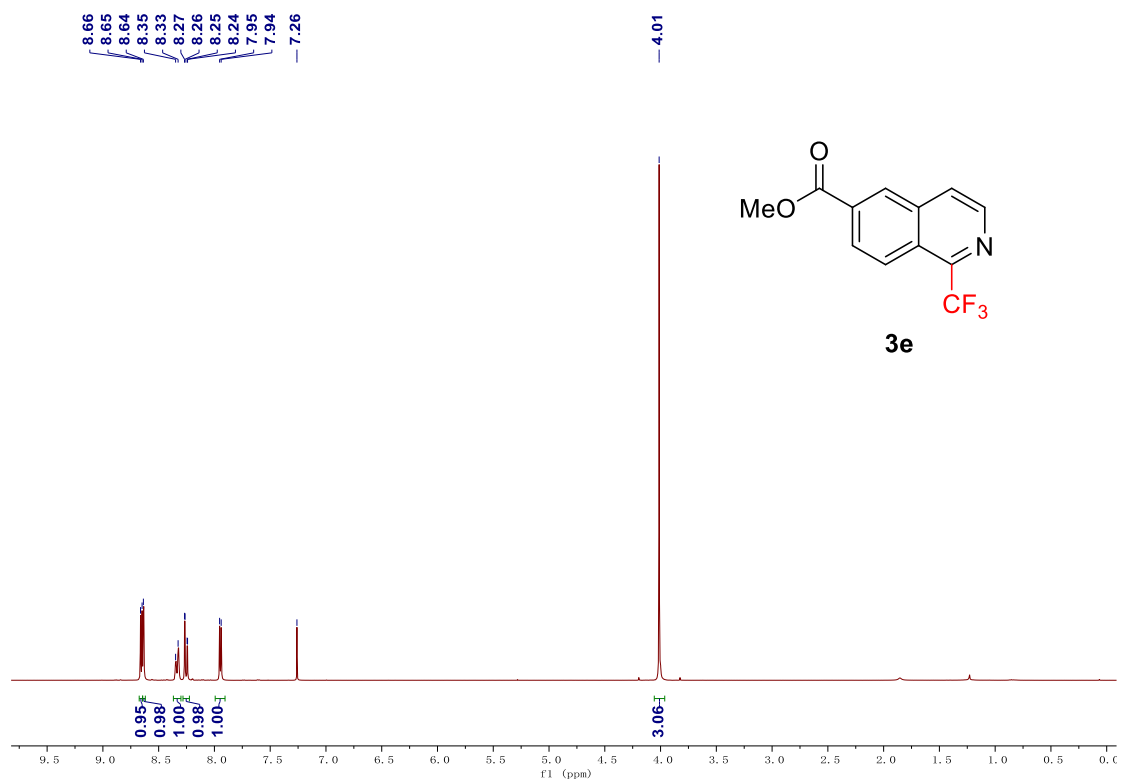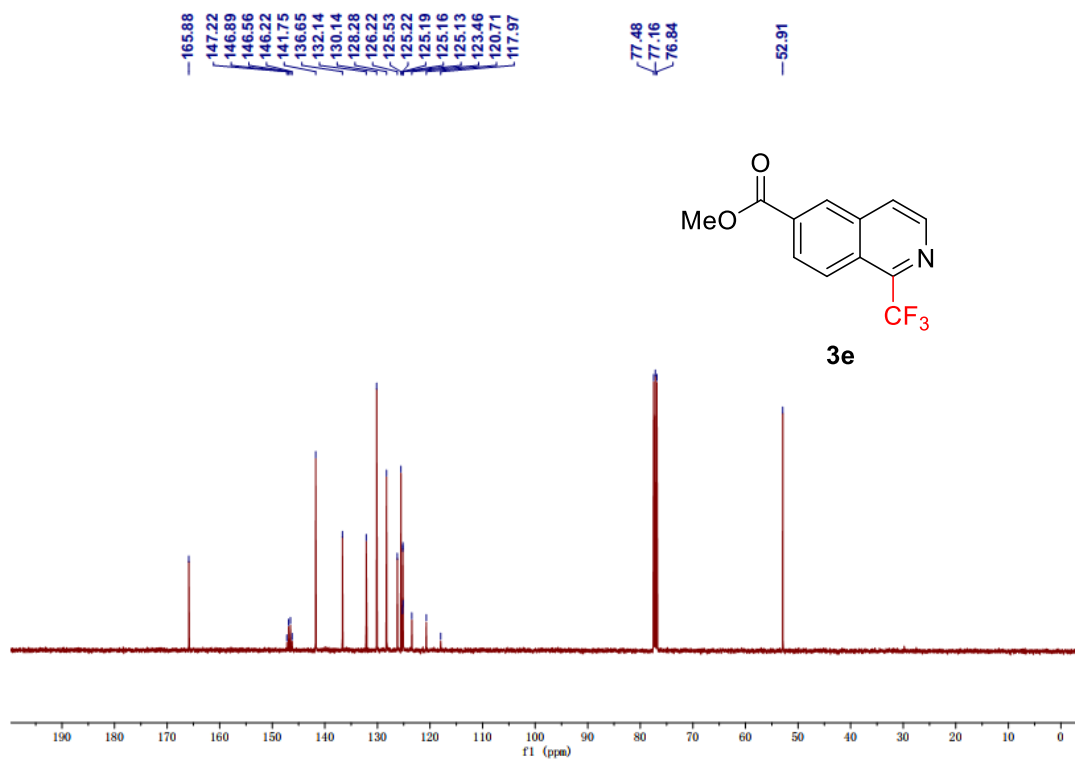

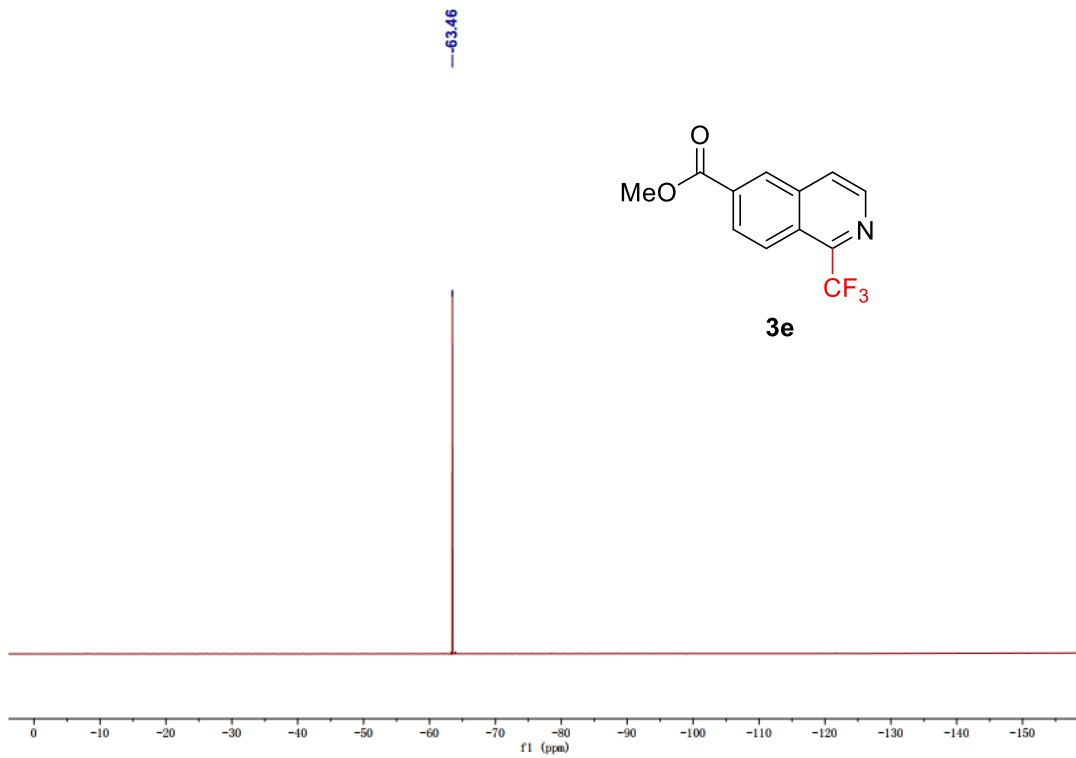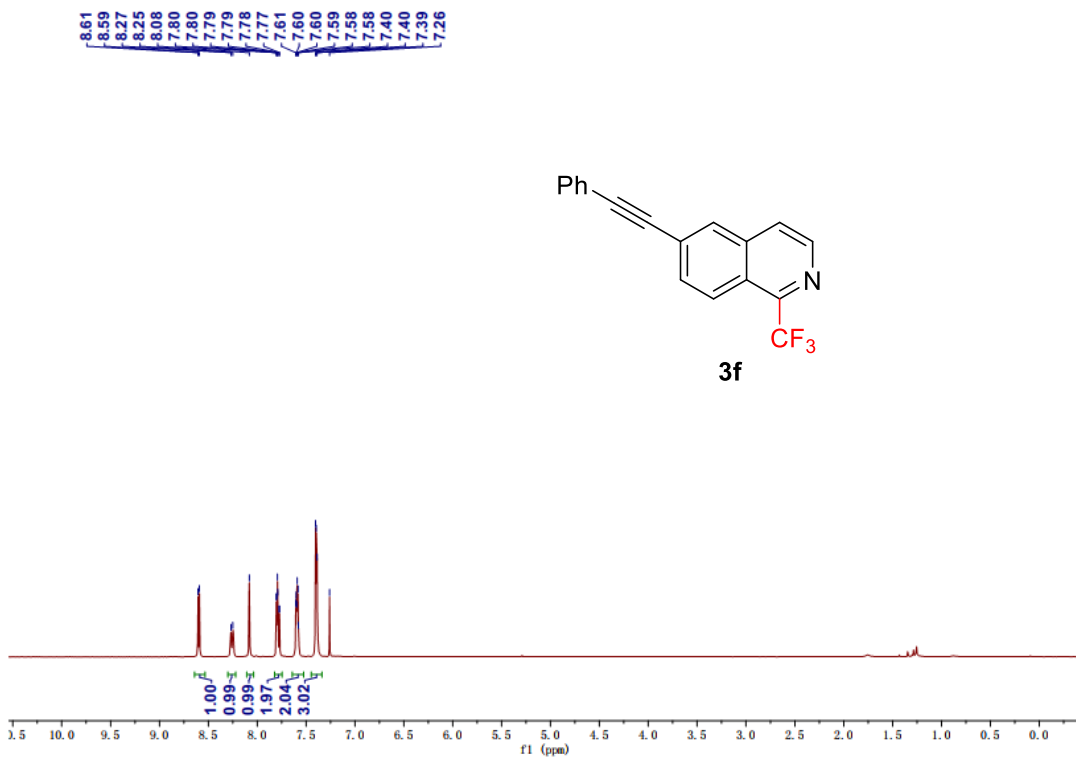

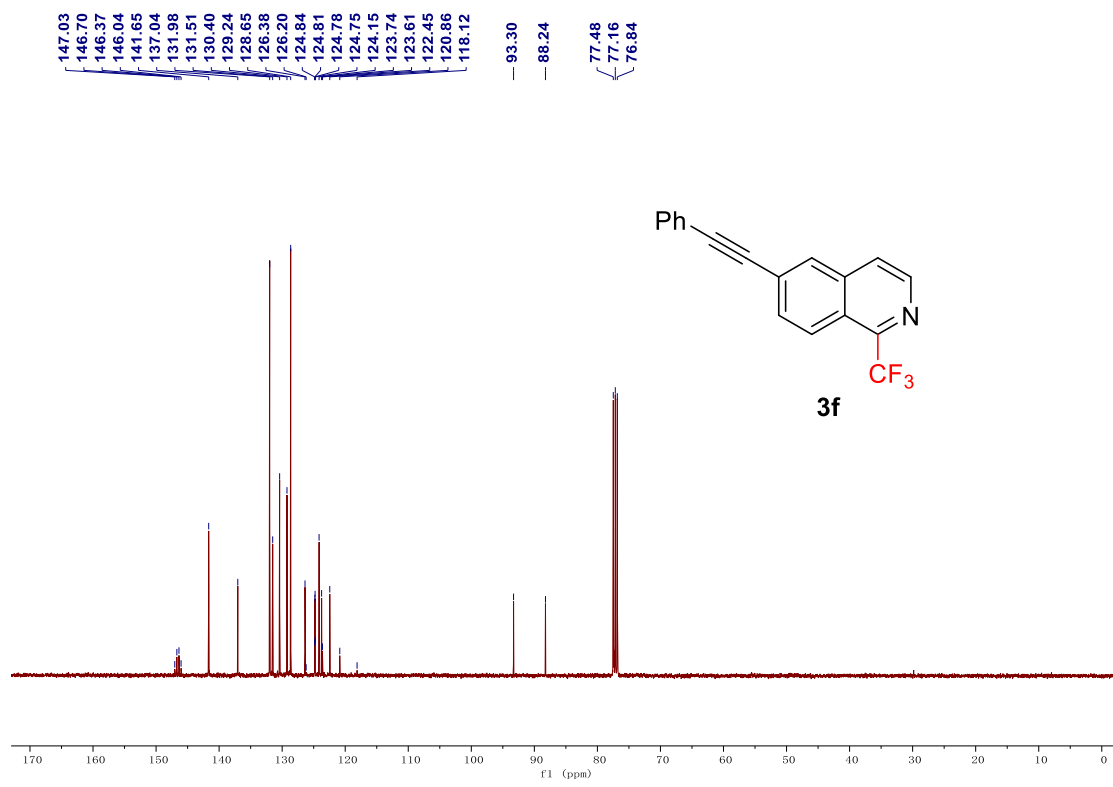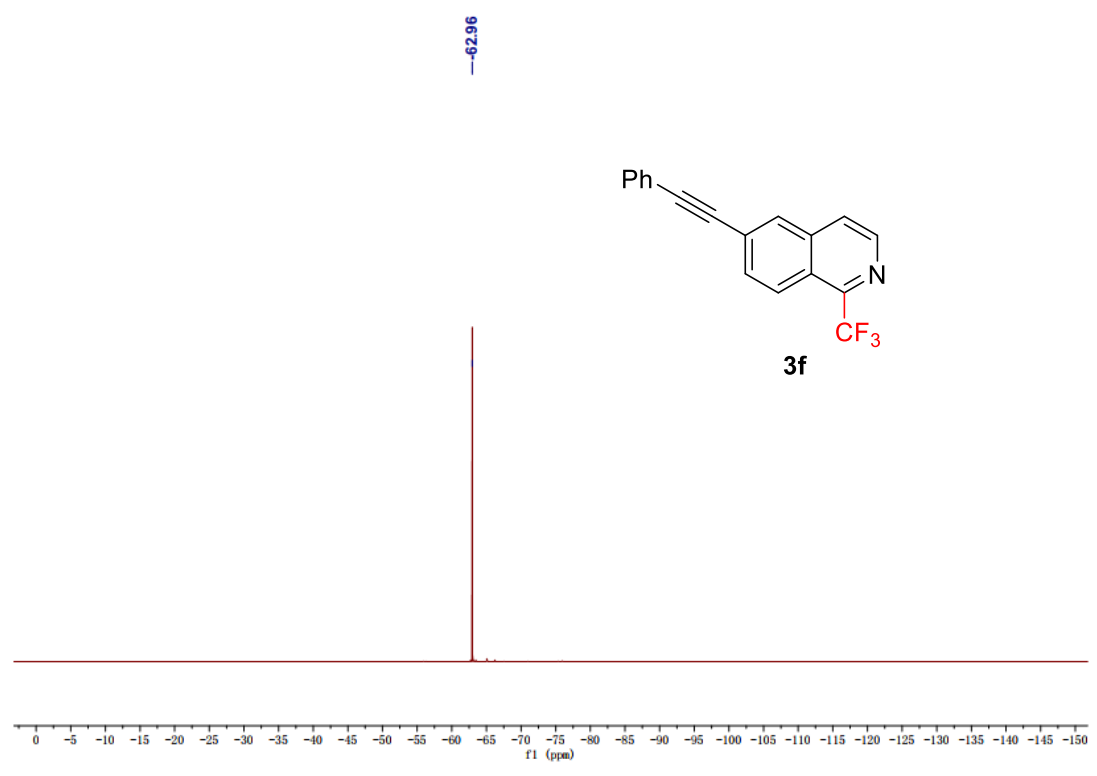



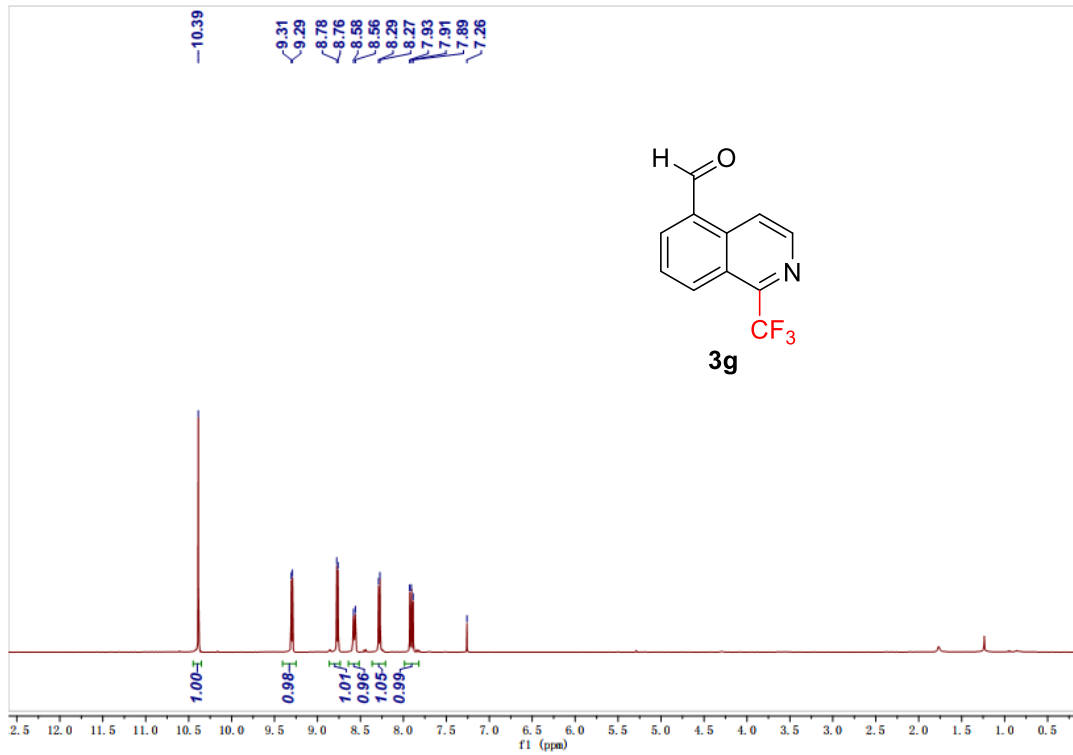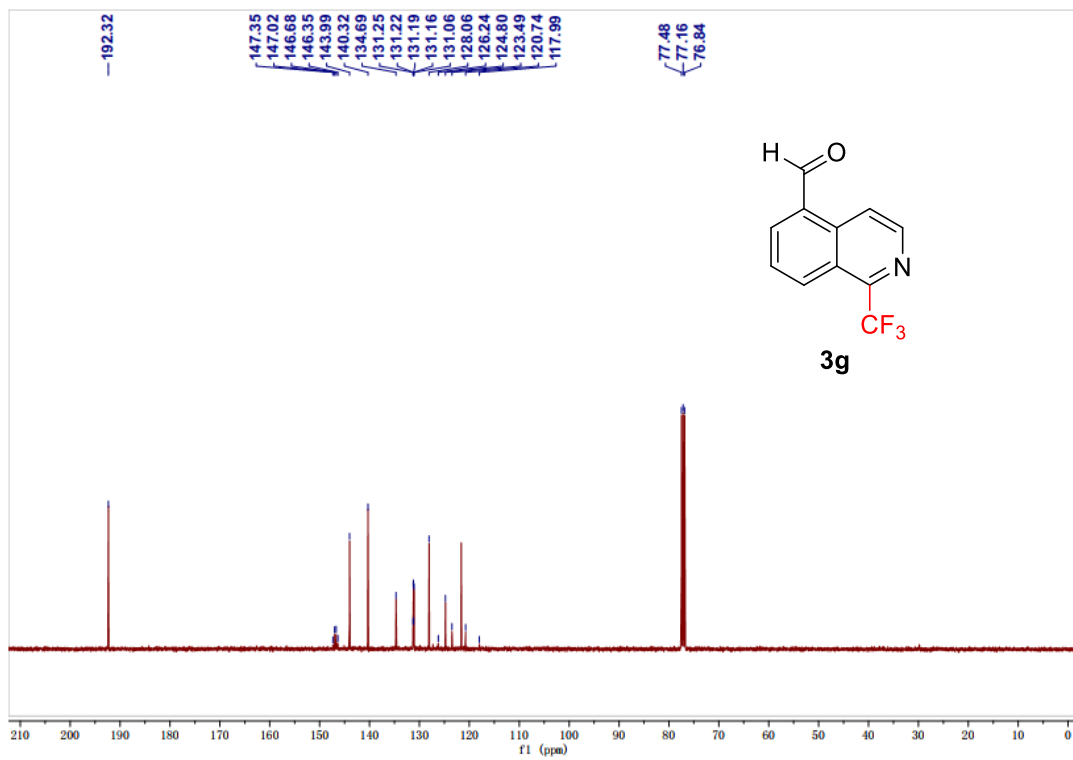

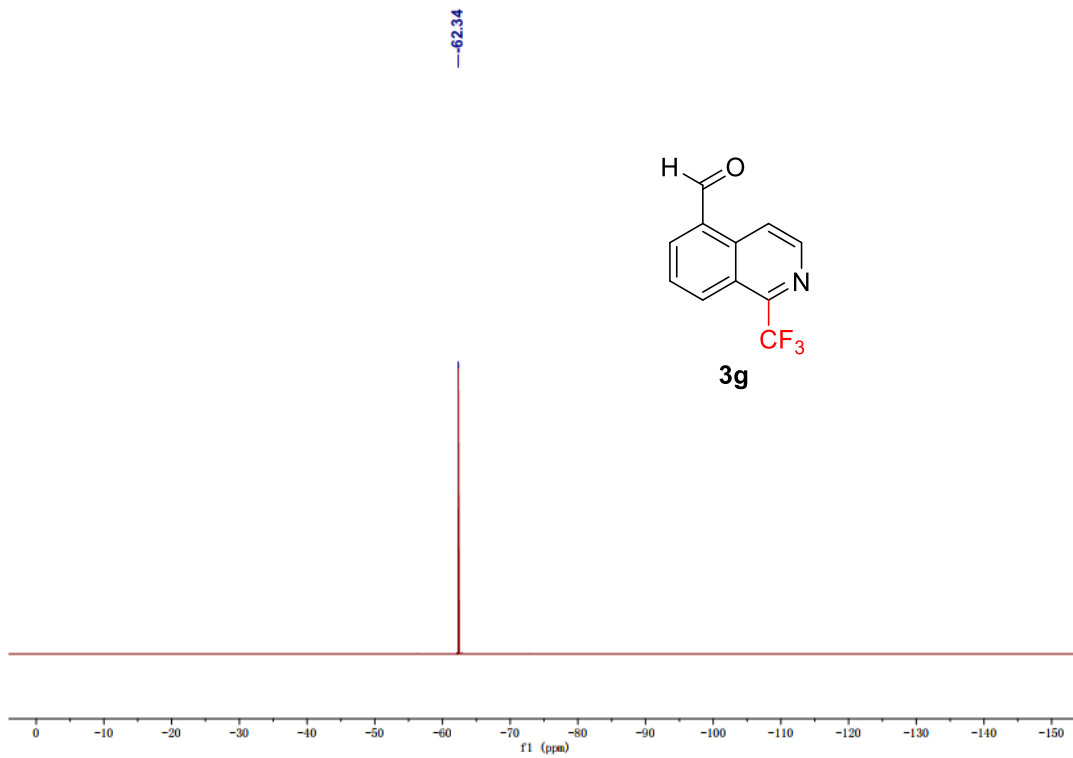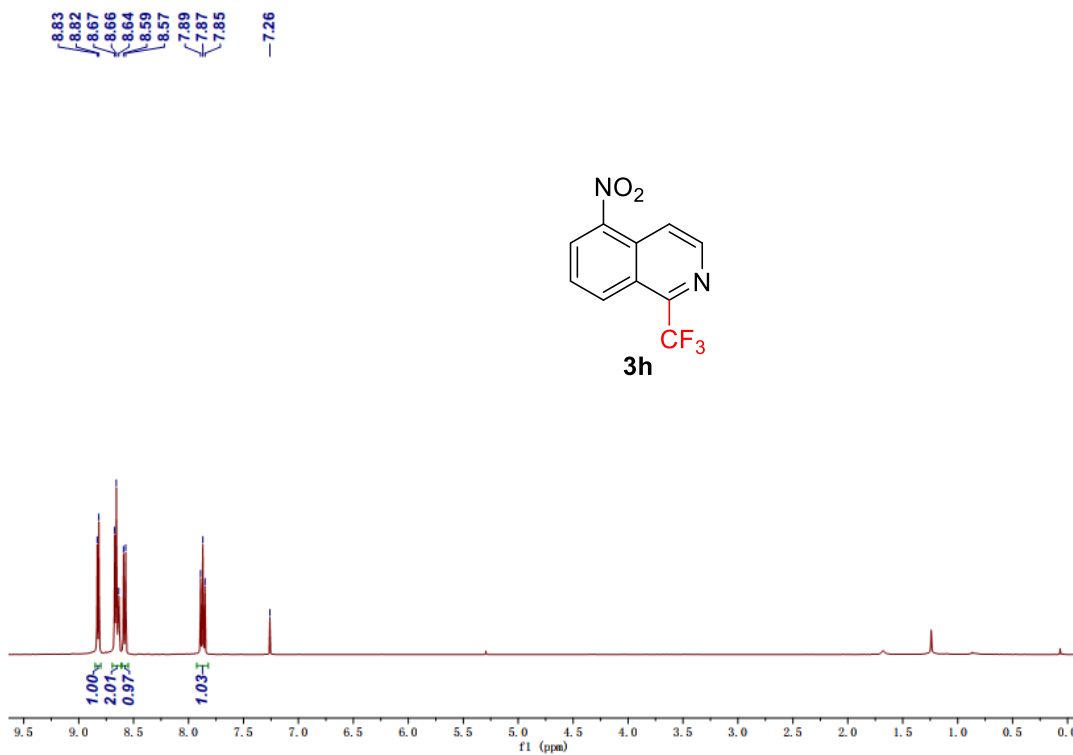

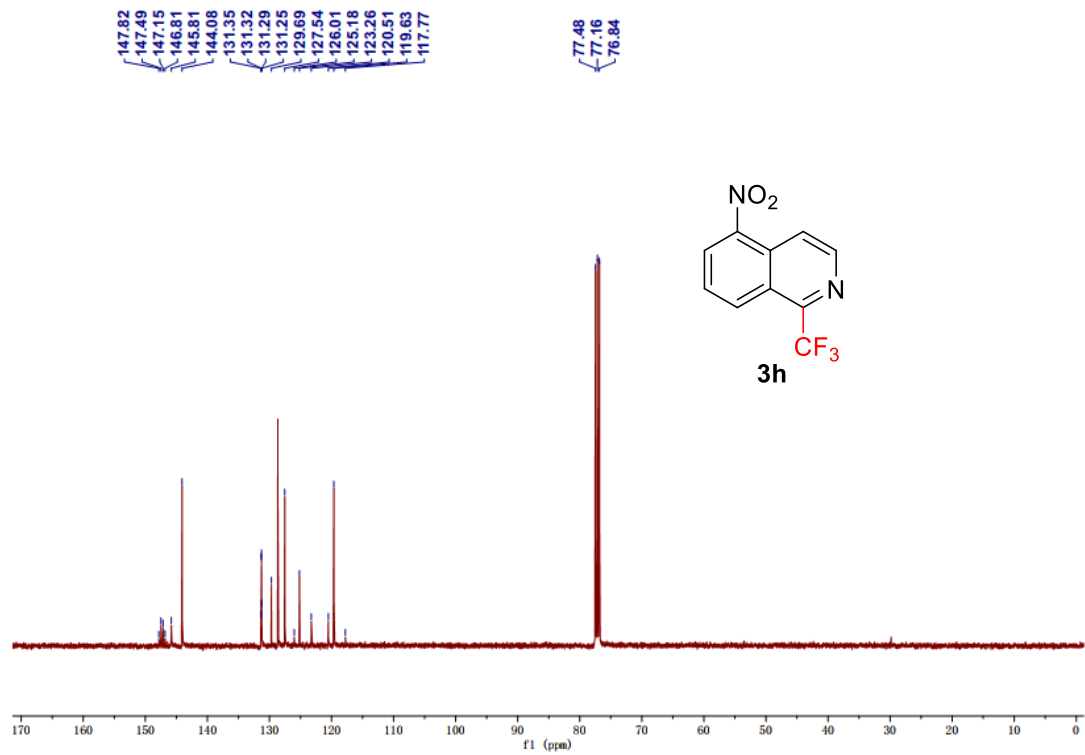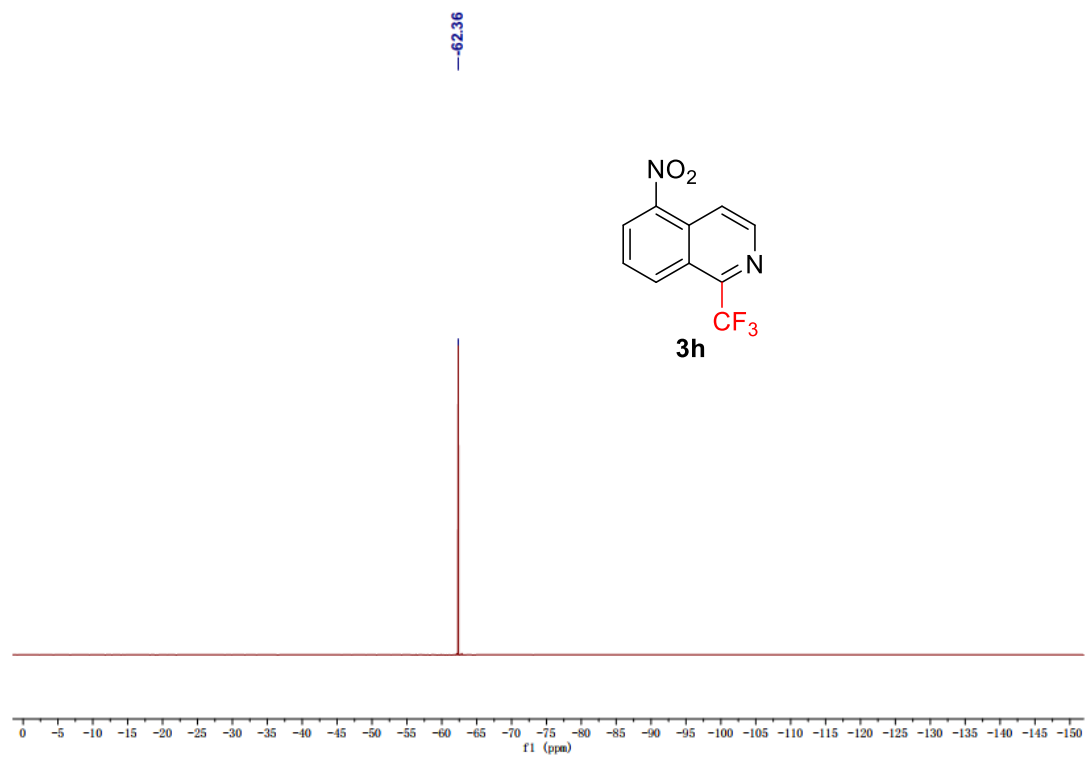

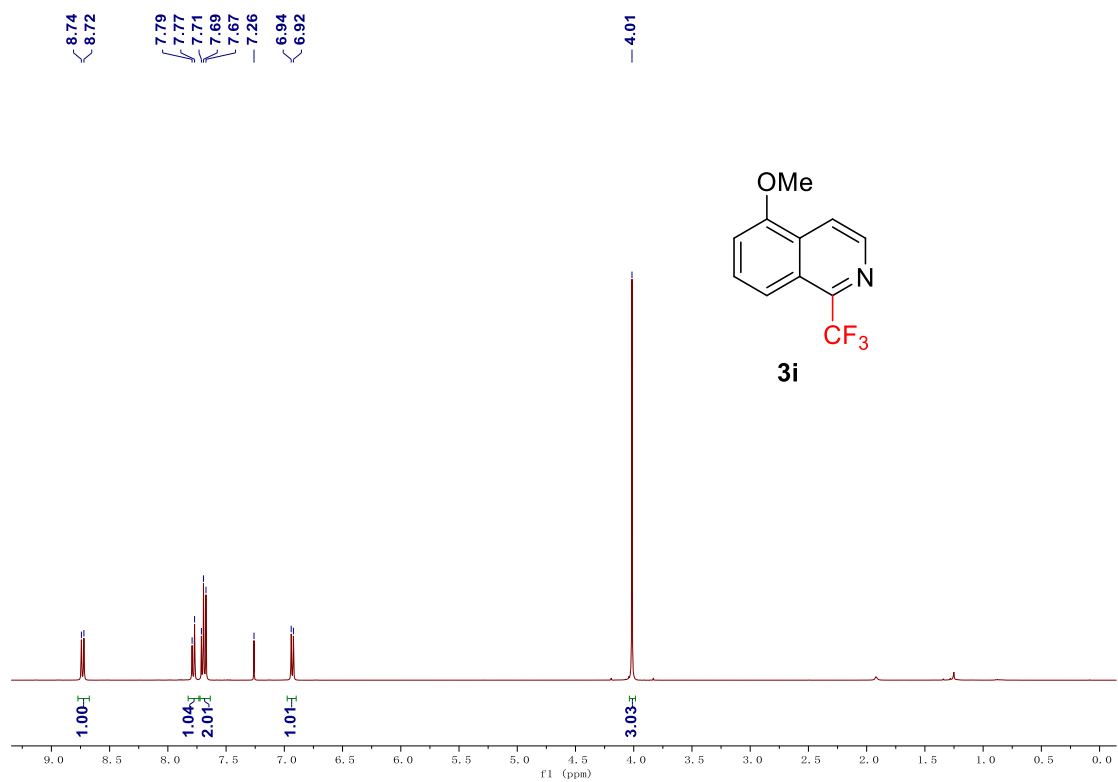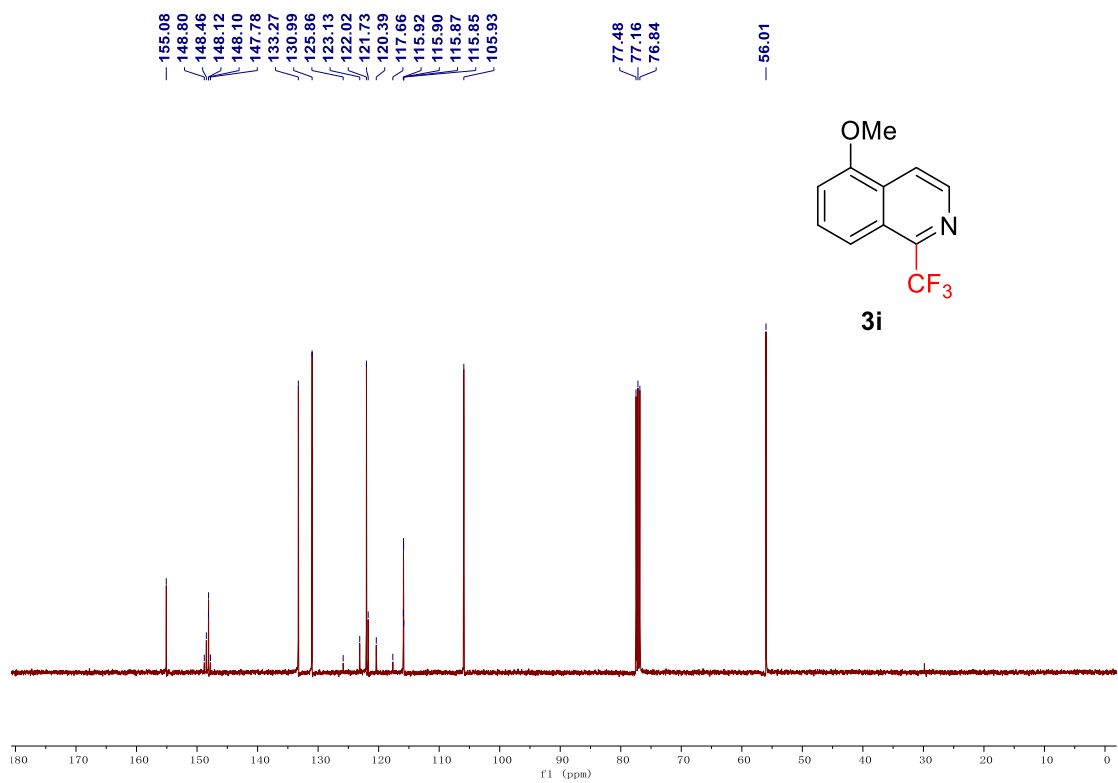

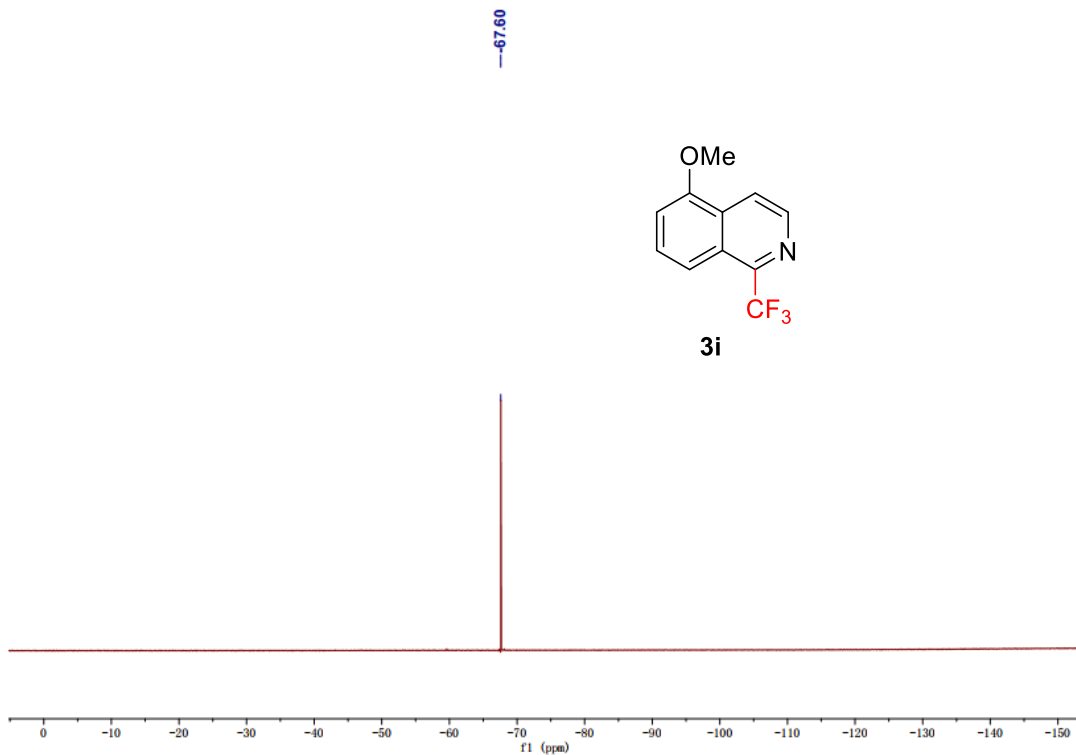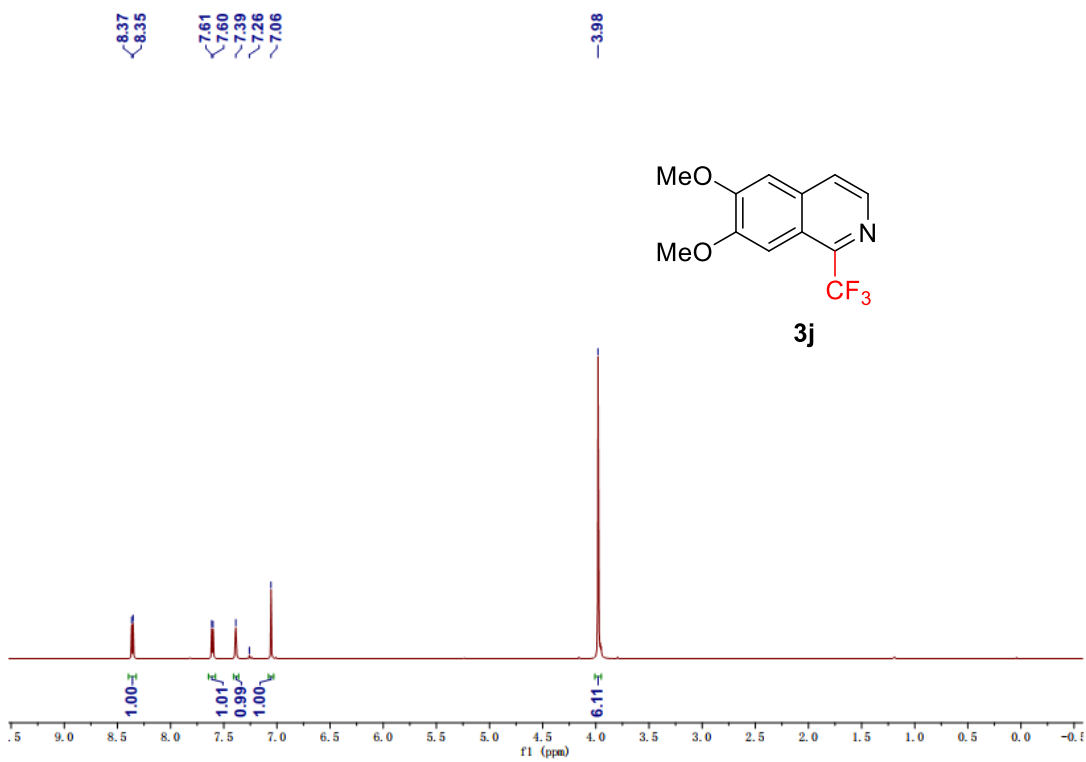

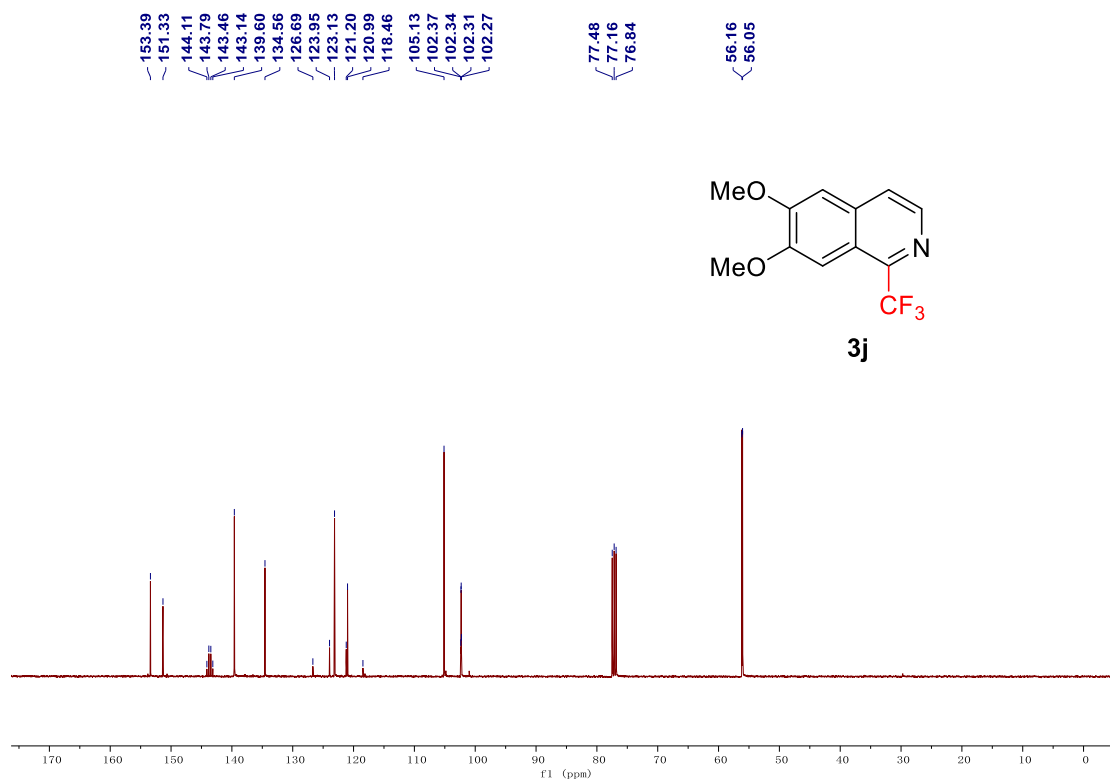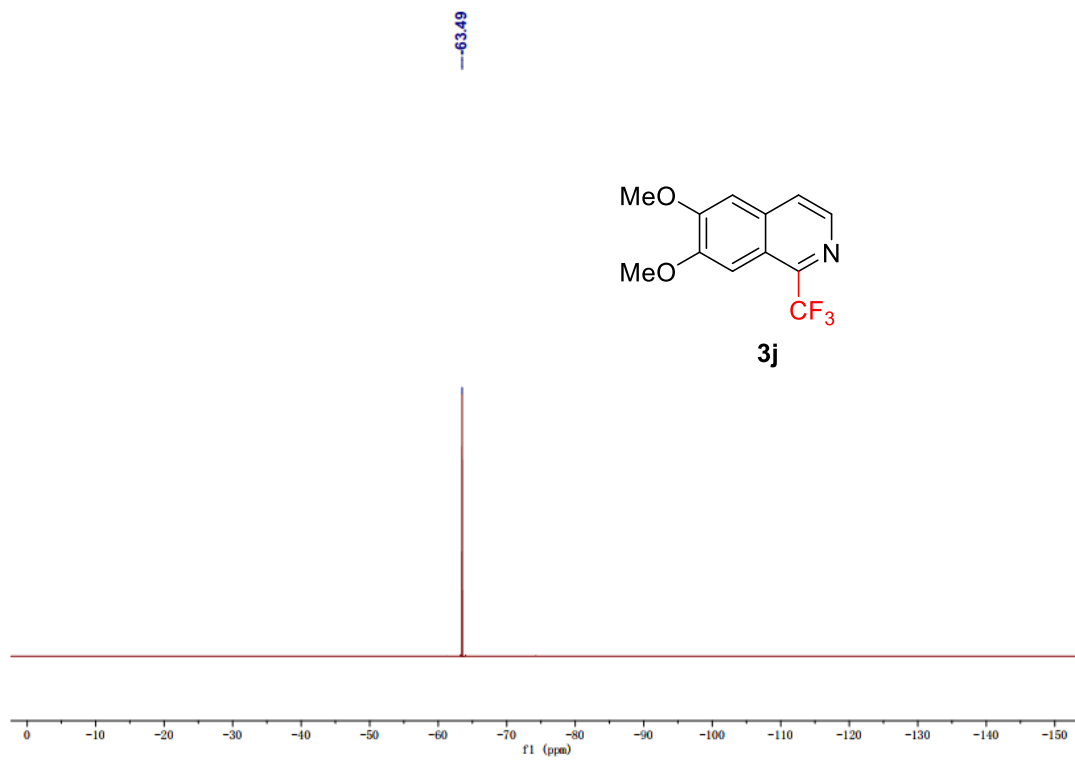

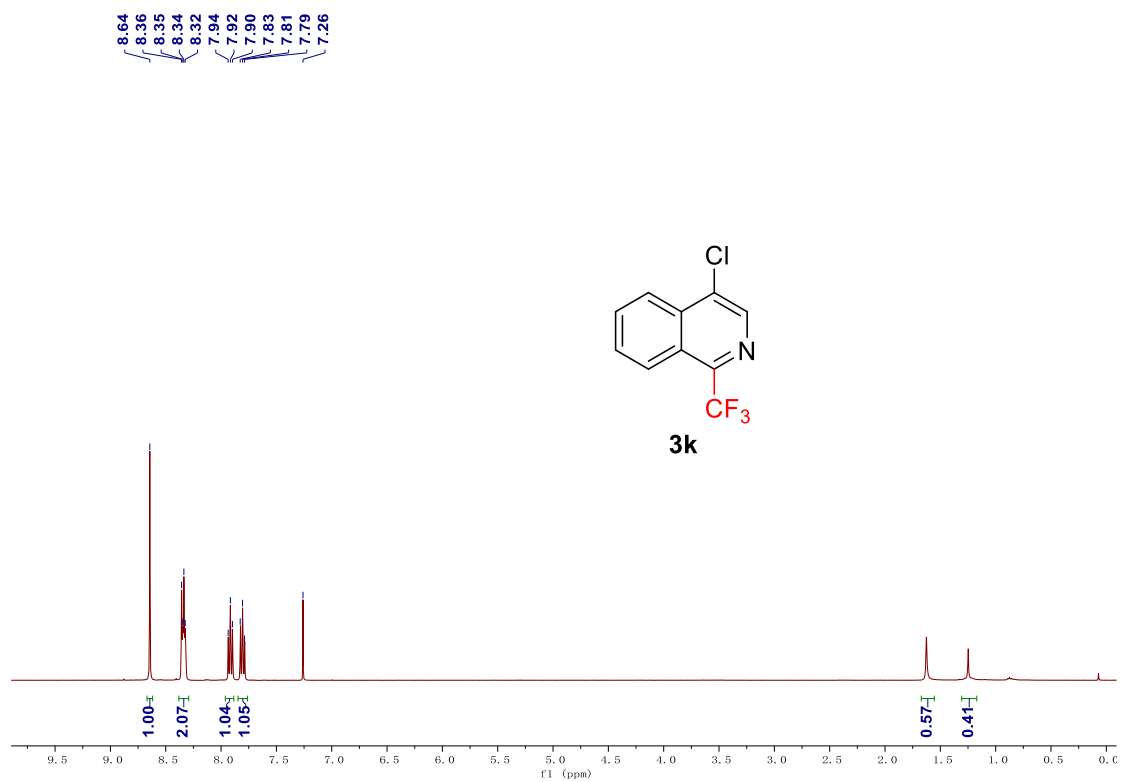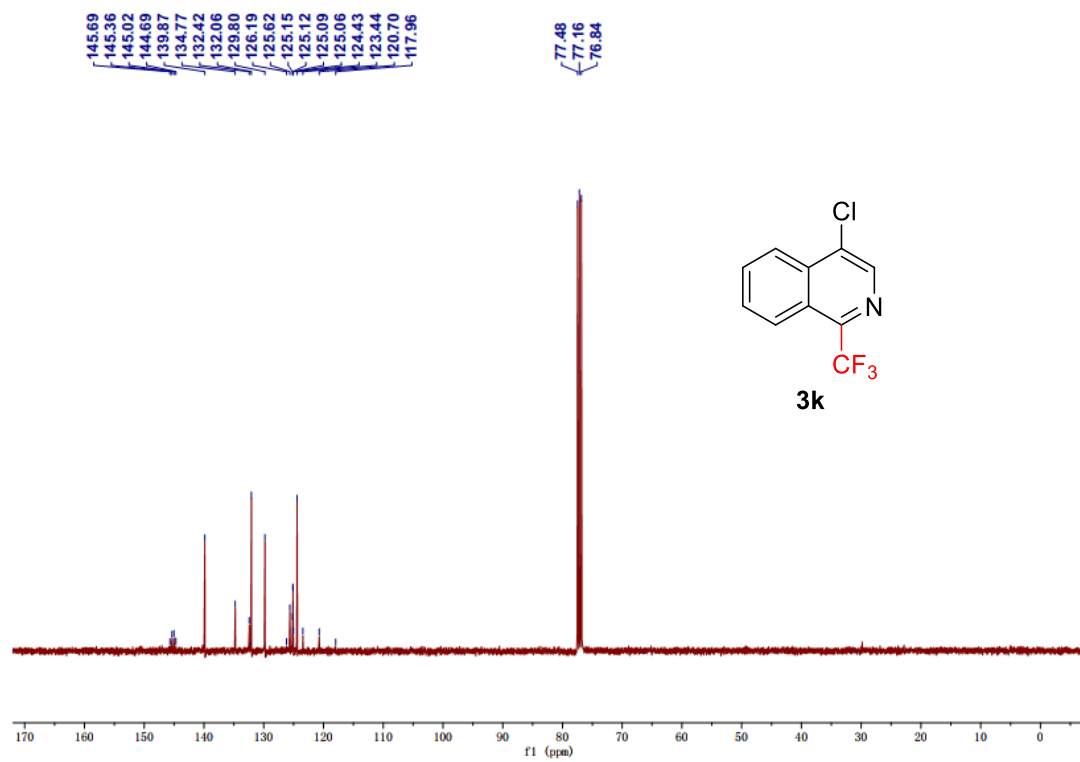

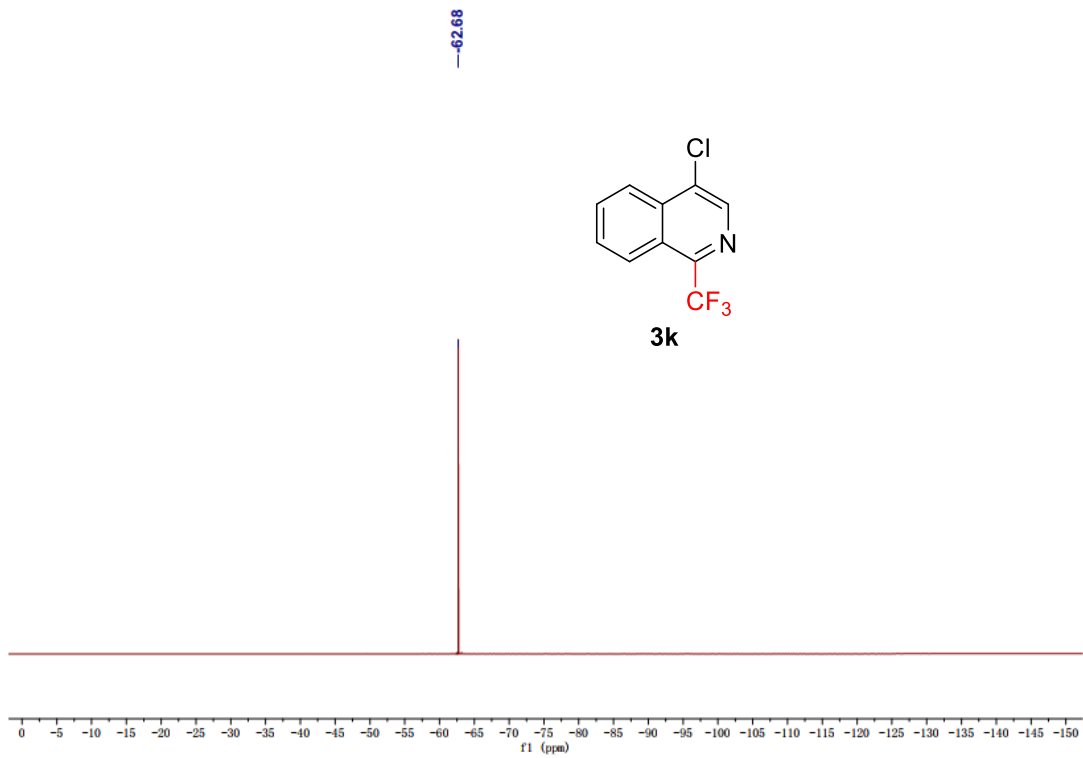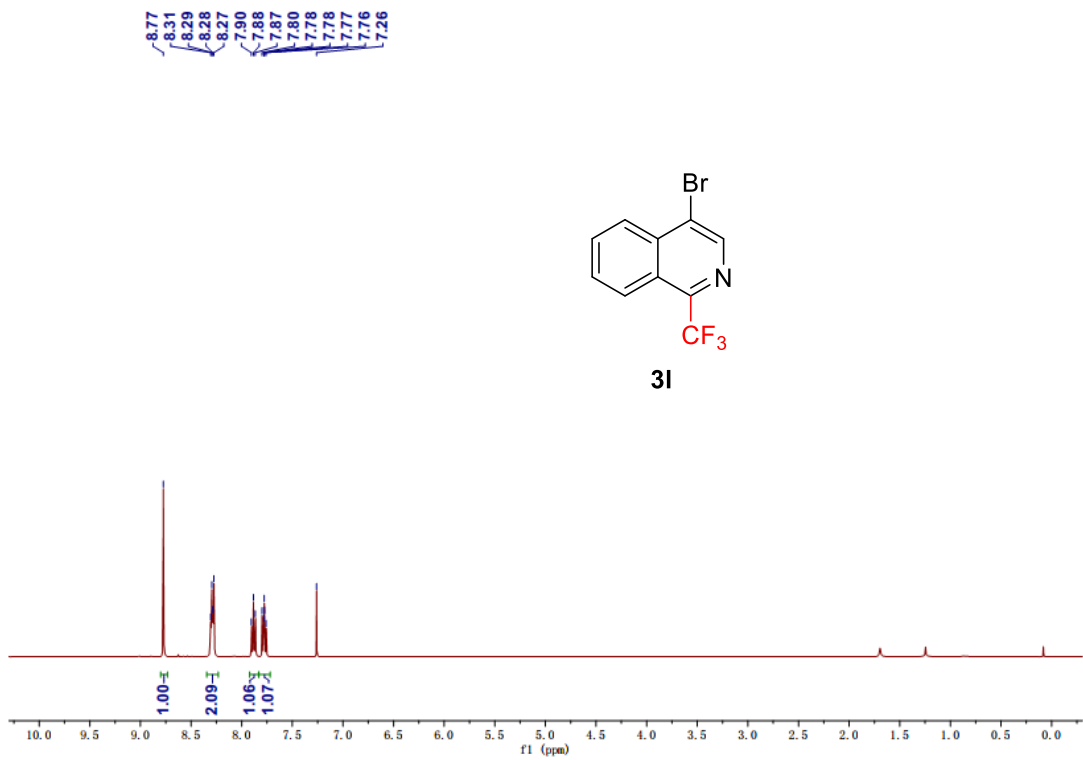



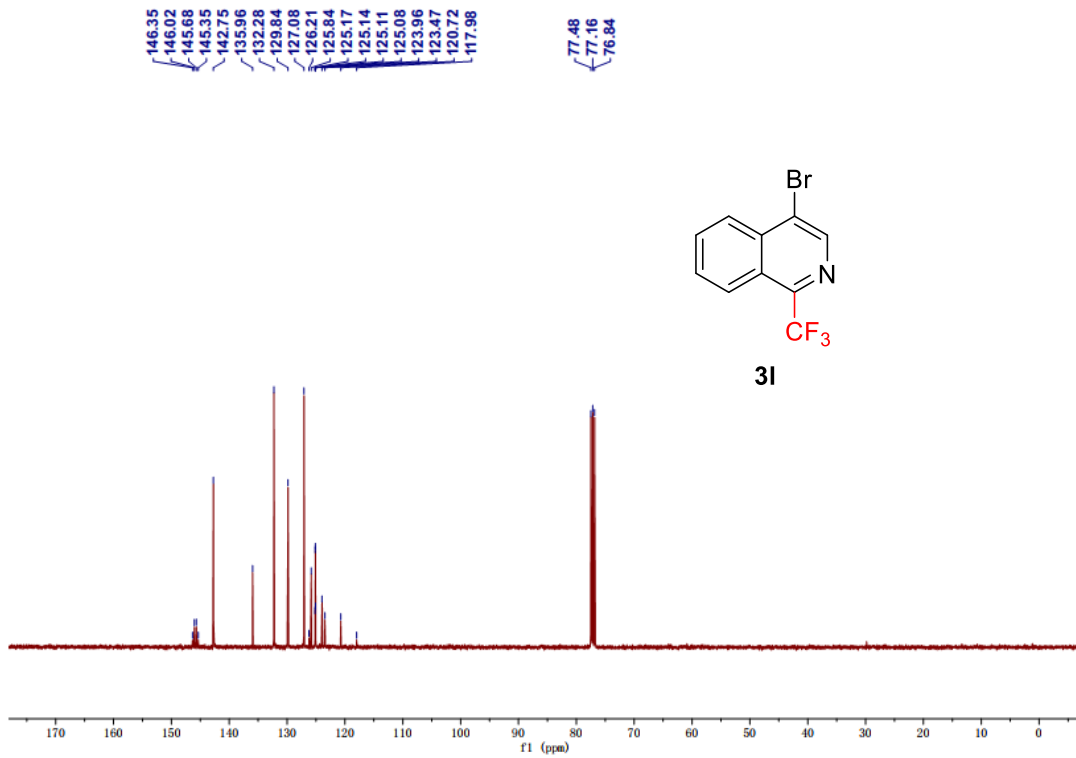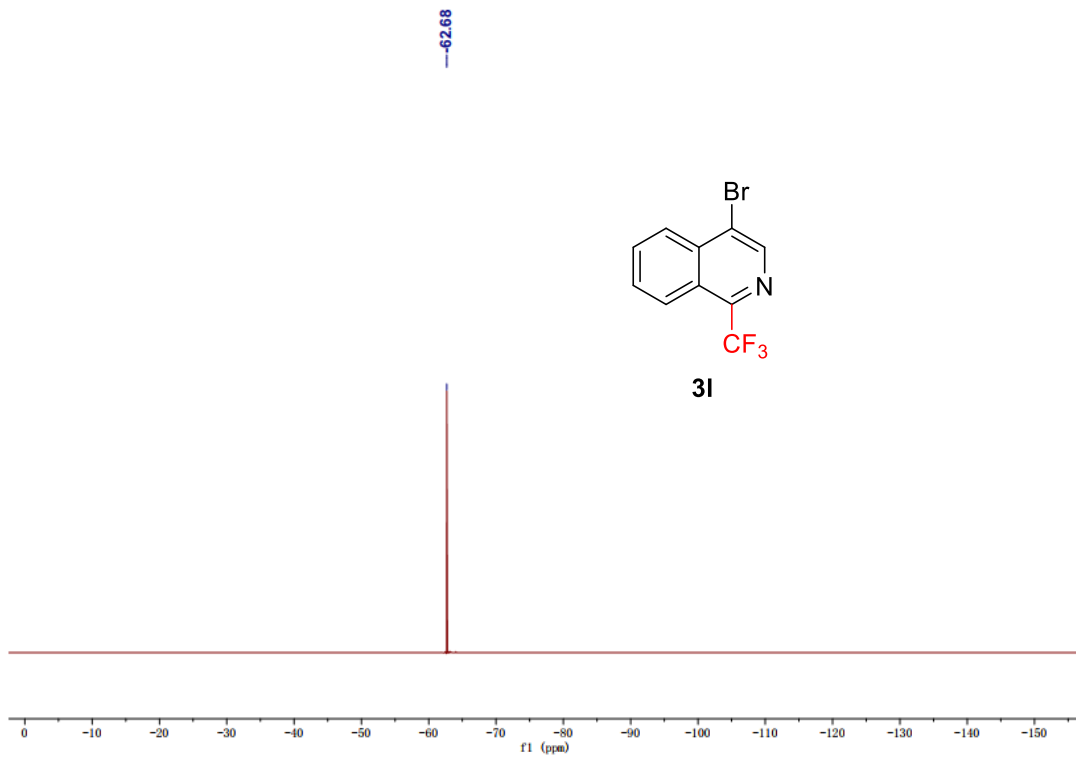

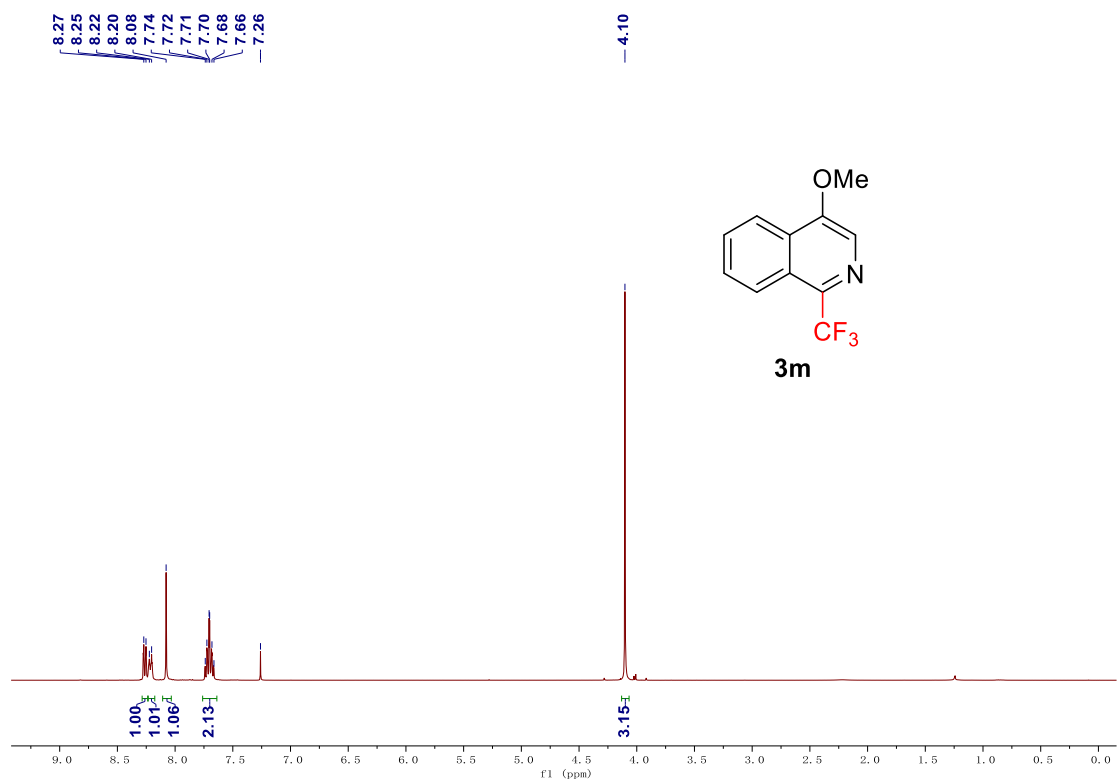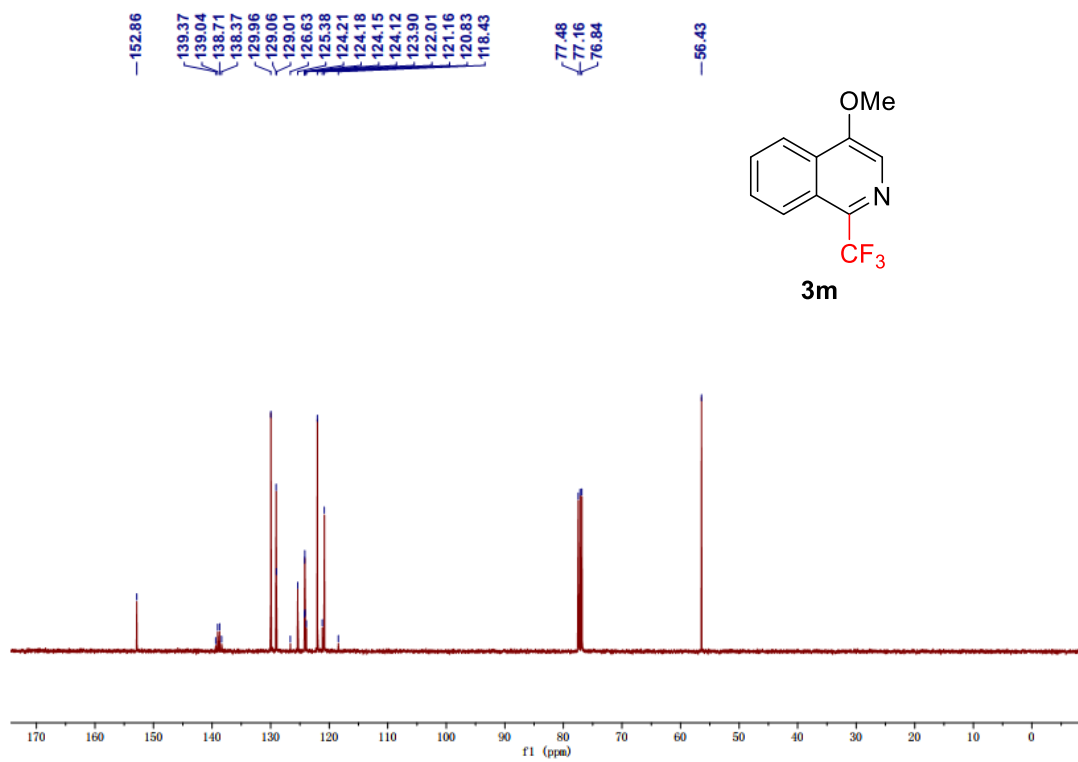

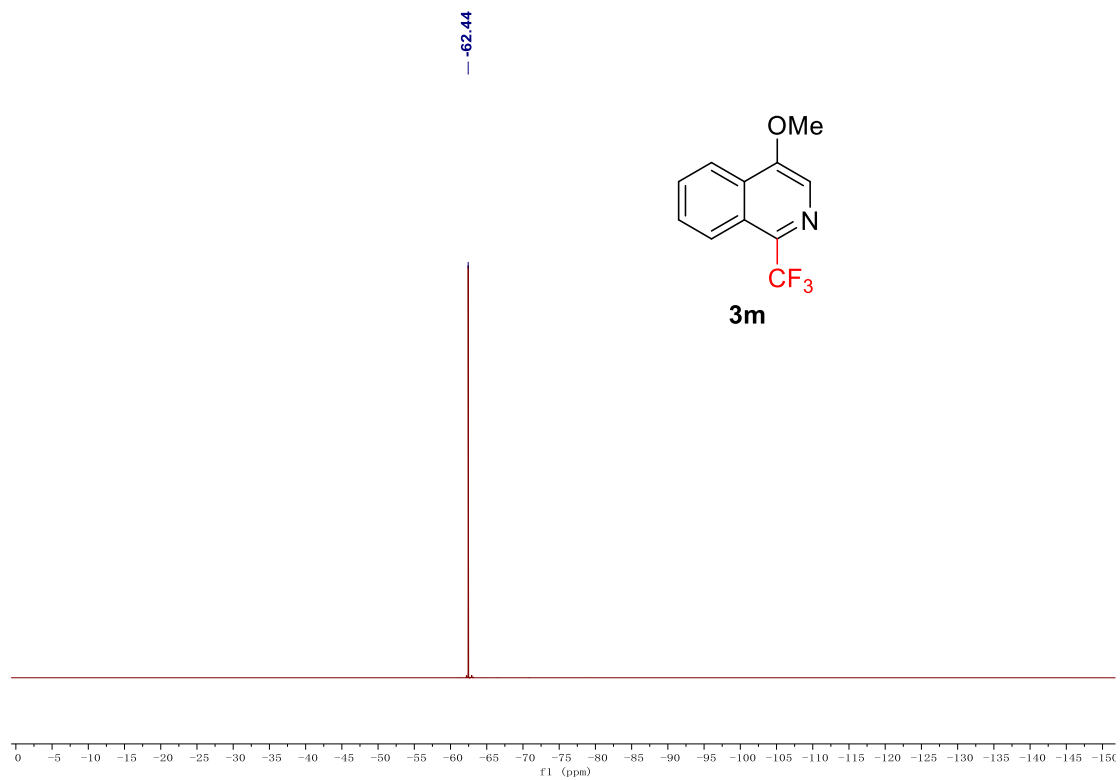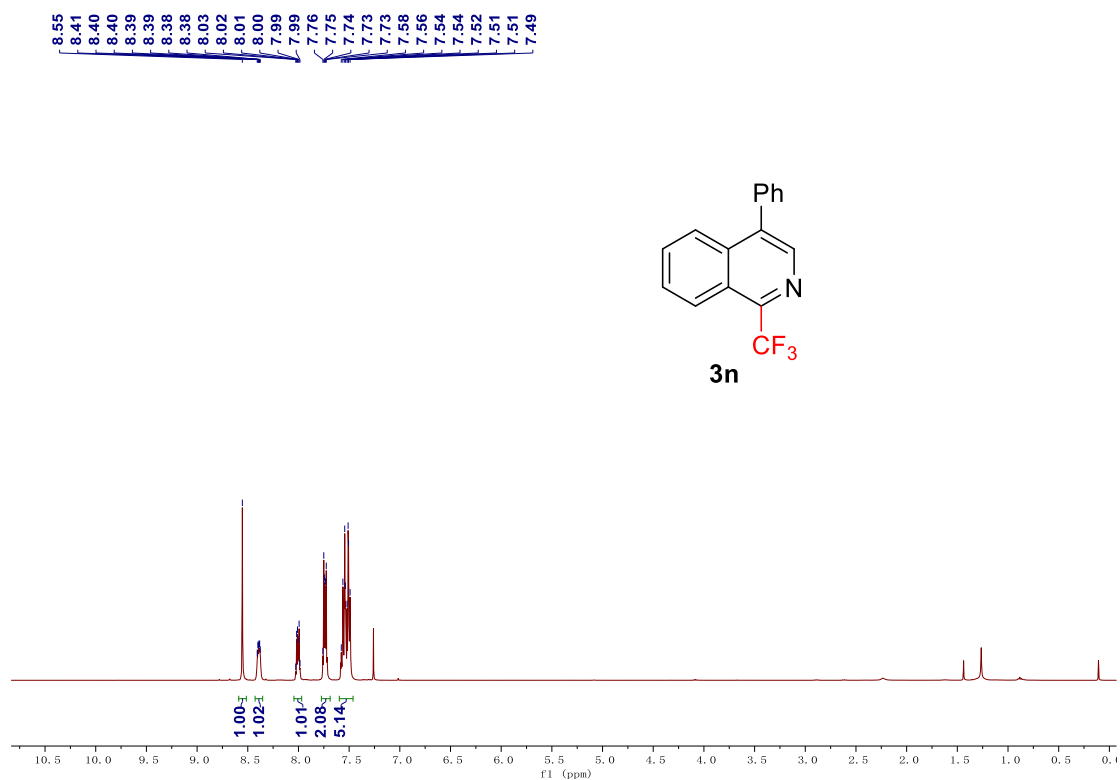

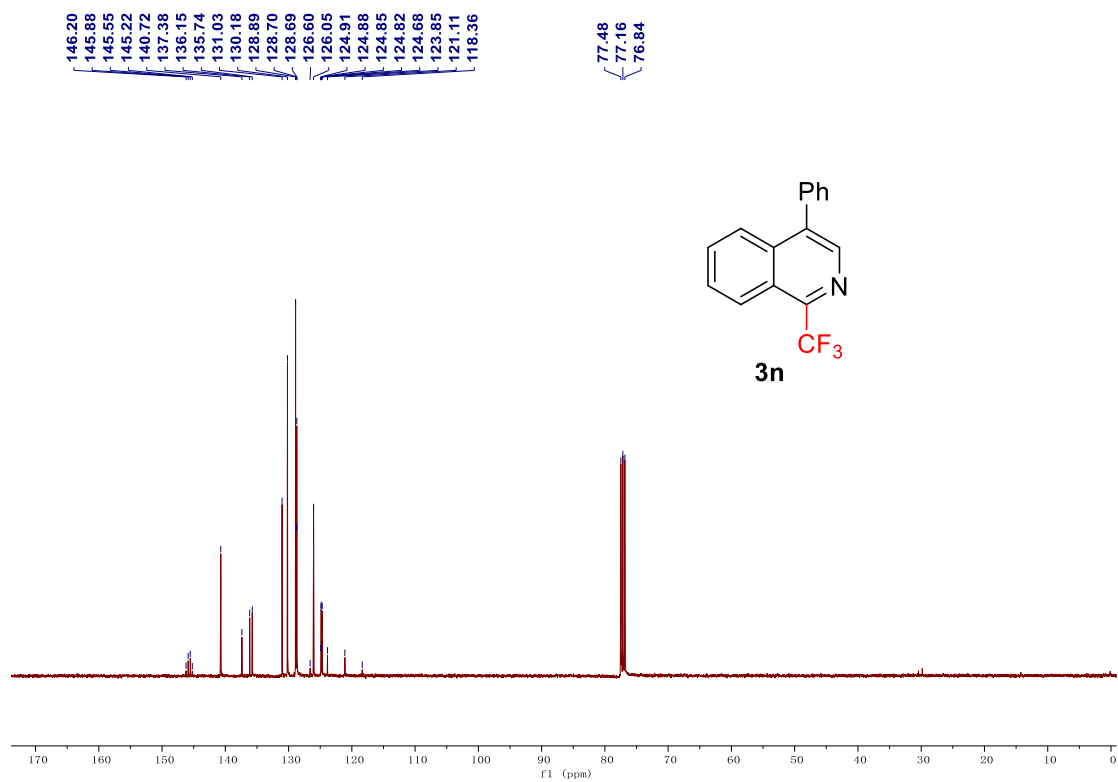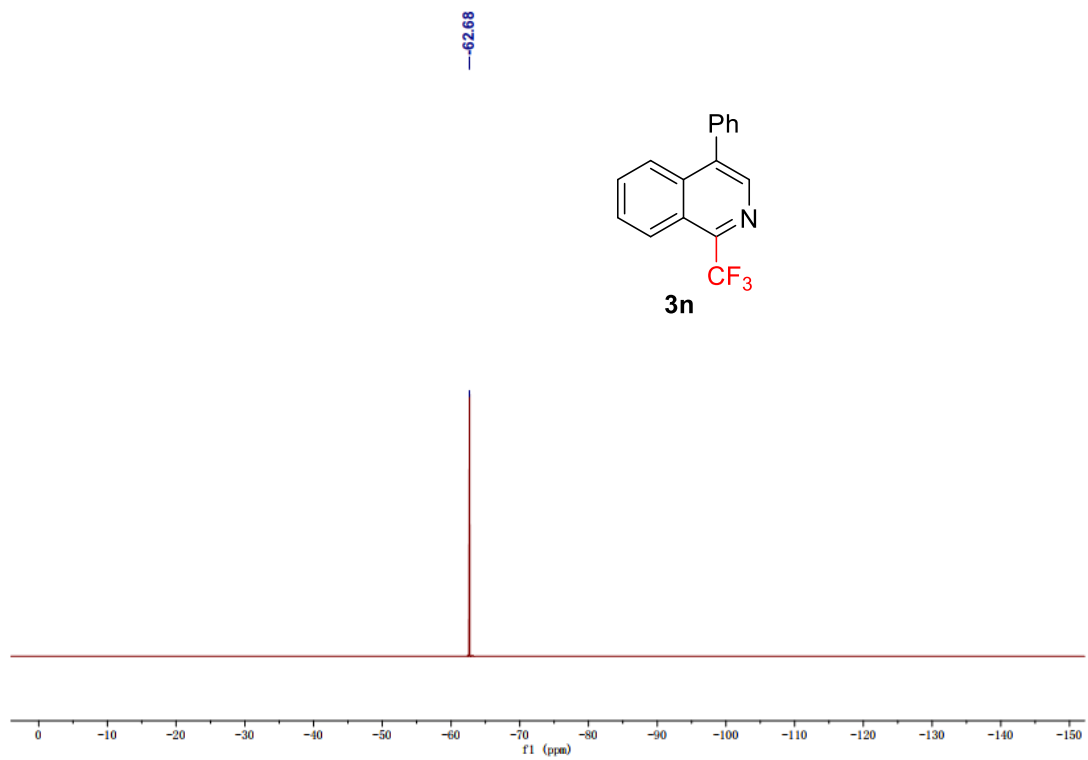

8.59  
8.57  
8.09  
8.07  
7.87  
7.85  
7.82  
7.81  
7.53  
7.51  
7.49  
7.26

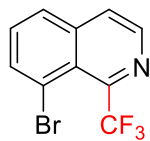

3o

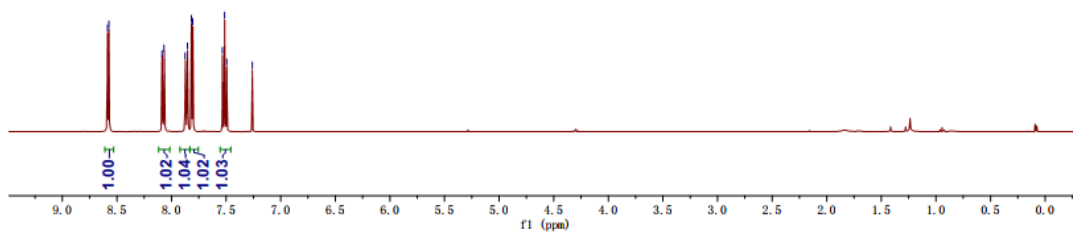

145.32  
144.98  
144.64  
144.30  
140.27  
140.12  
137.23  
130.74  
128.16  
125.79  
125.36  
125.27  
123.05  
120.32  
117.59  
117.47

77.48  
77.16  
76.84

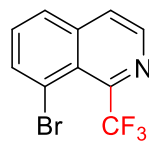

3o

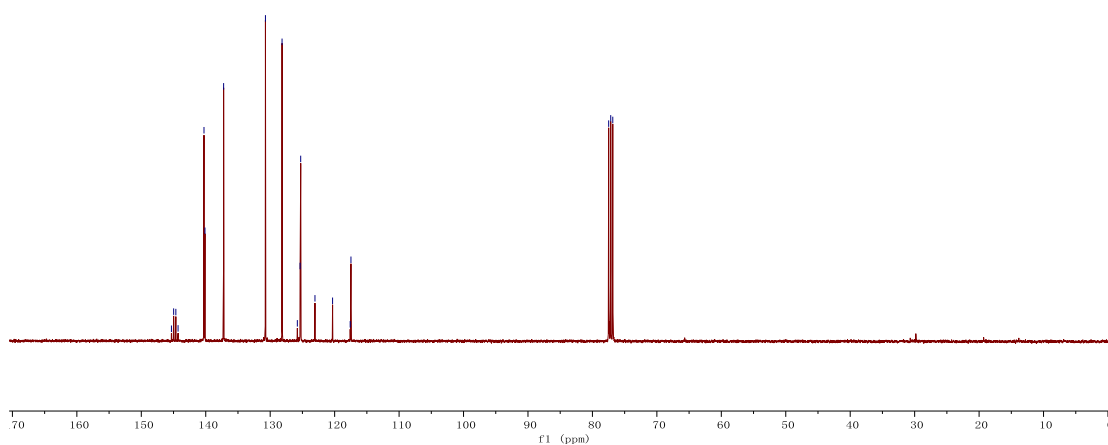

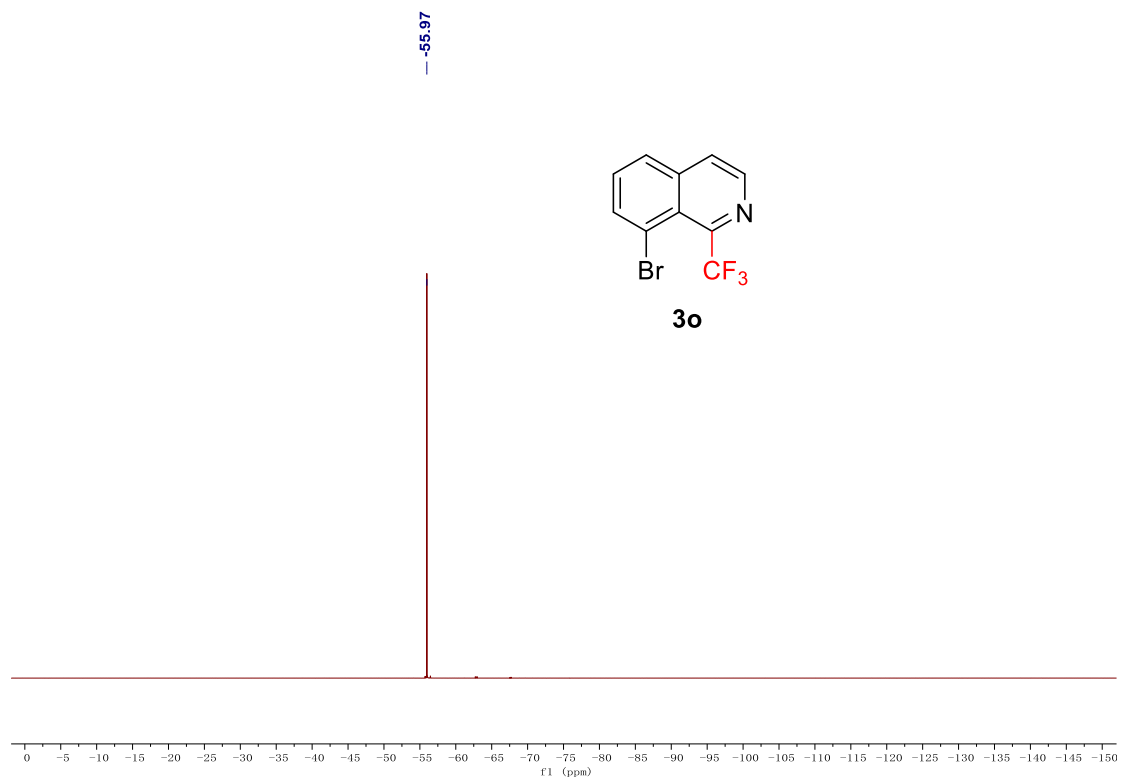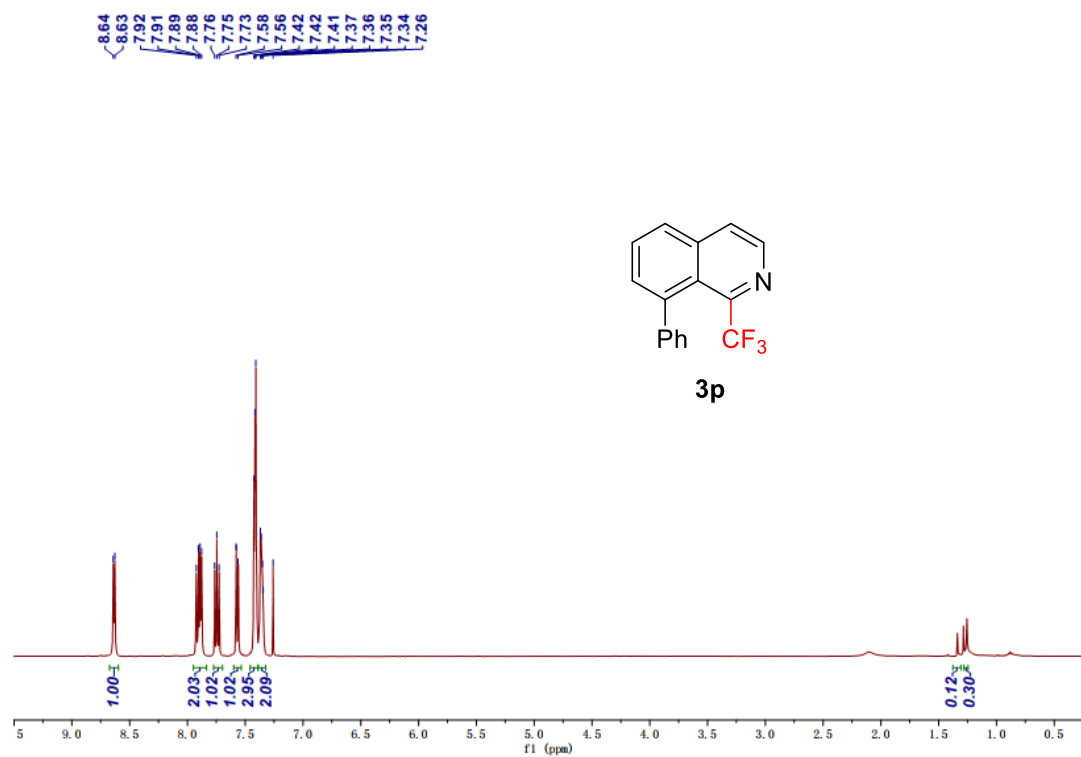

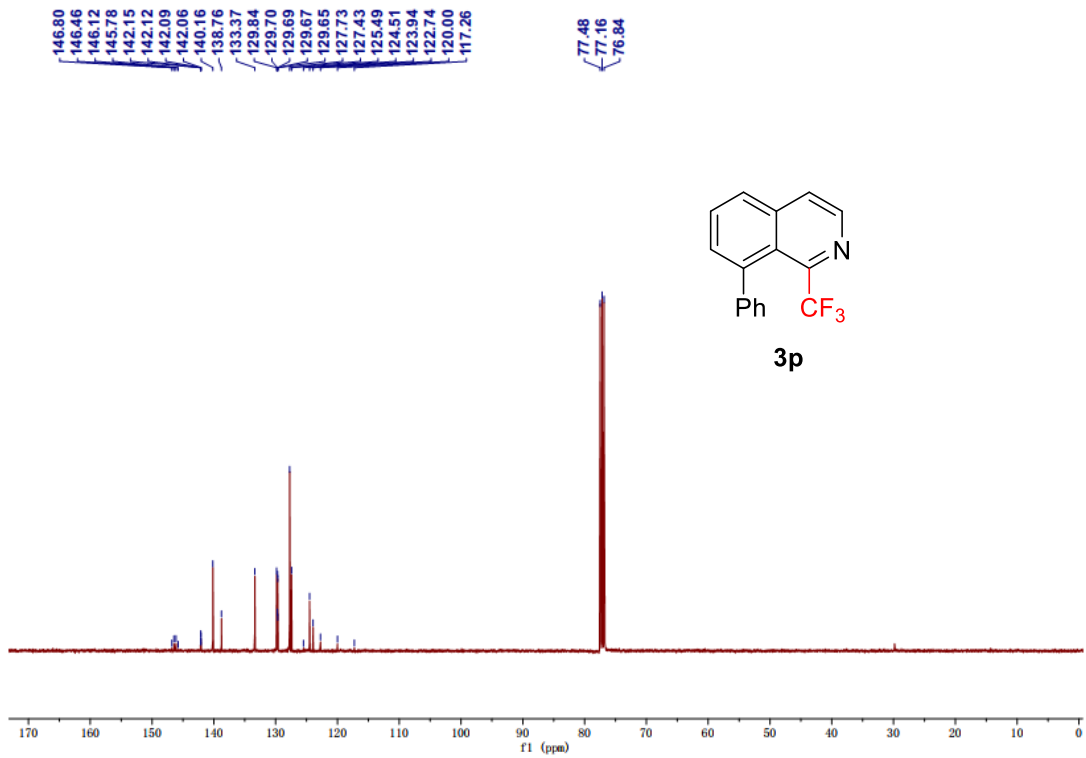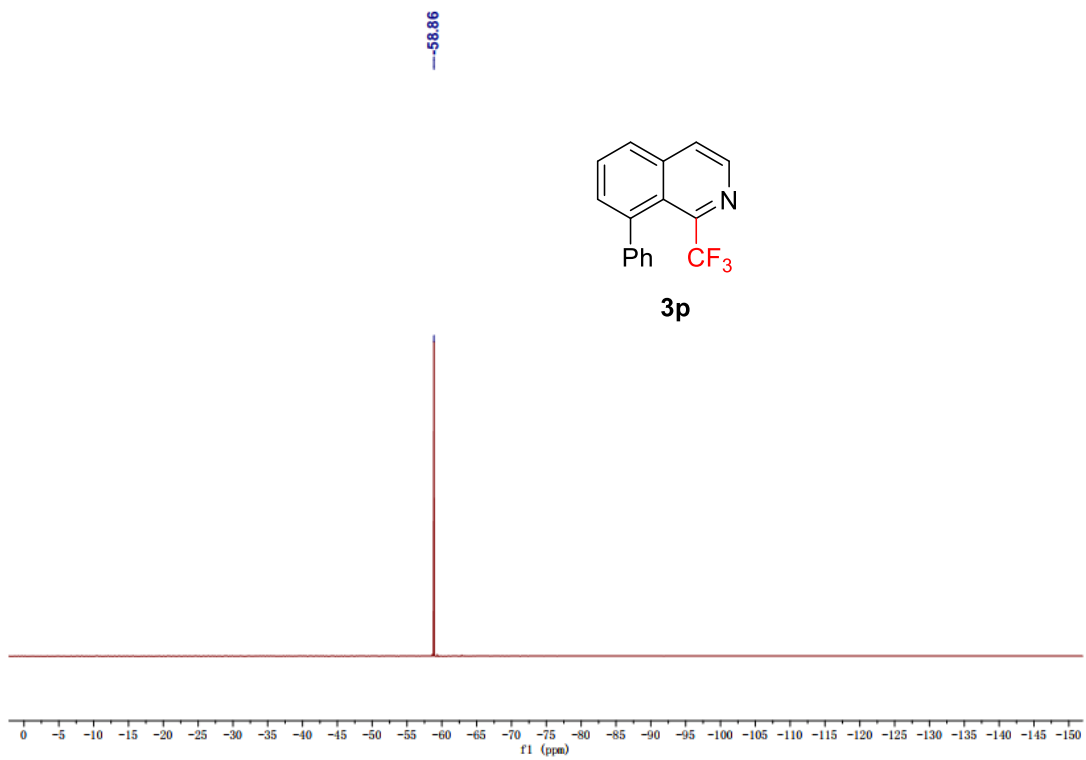

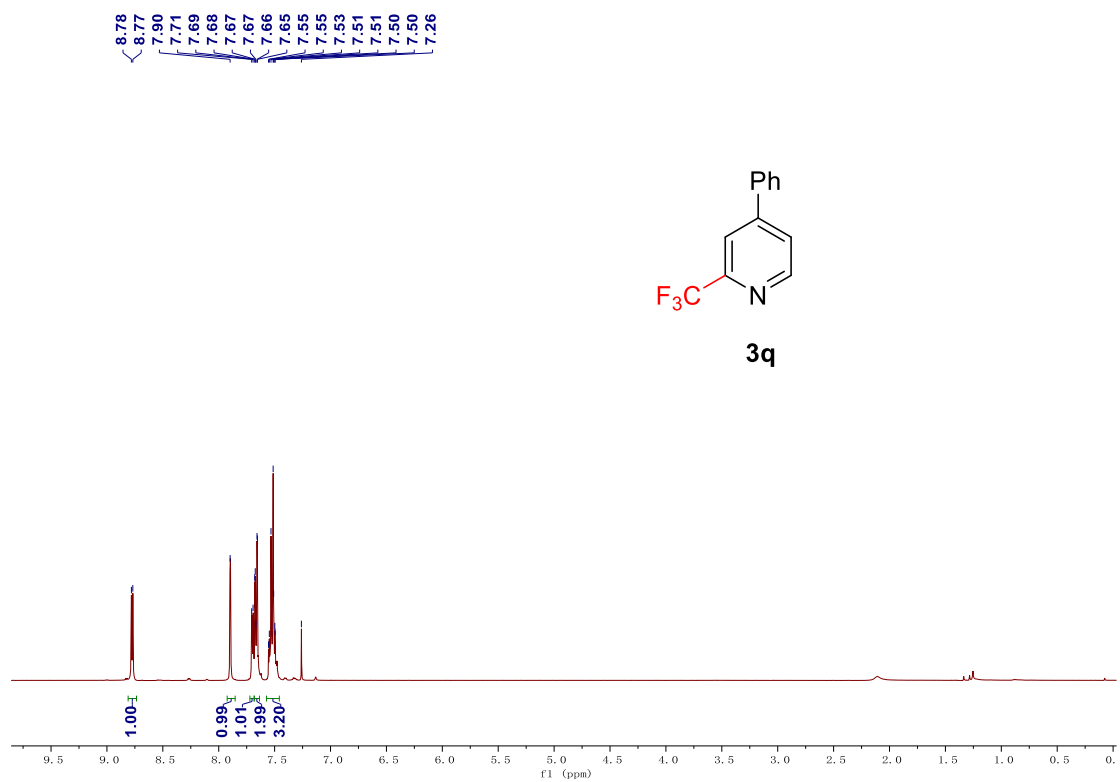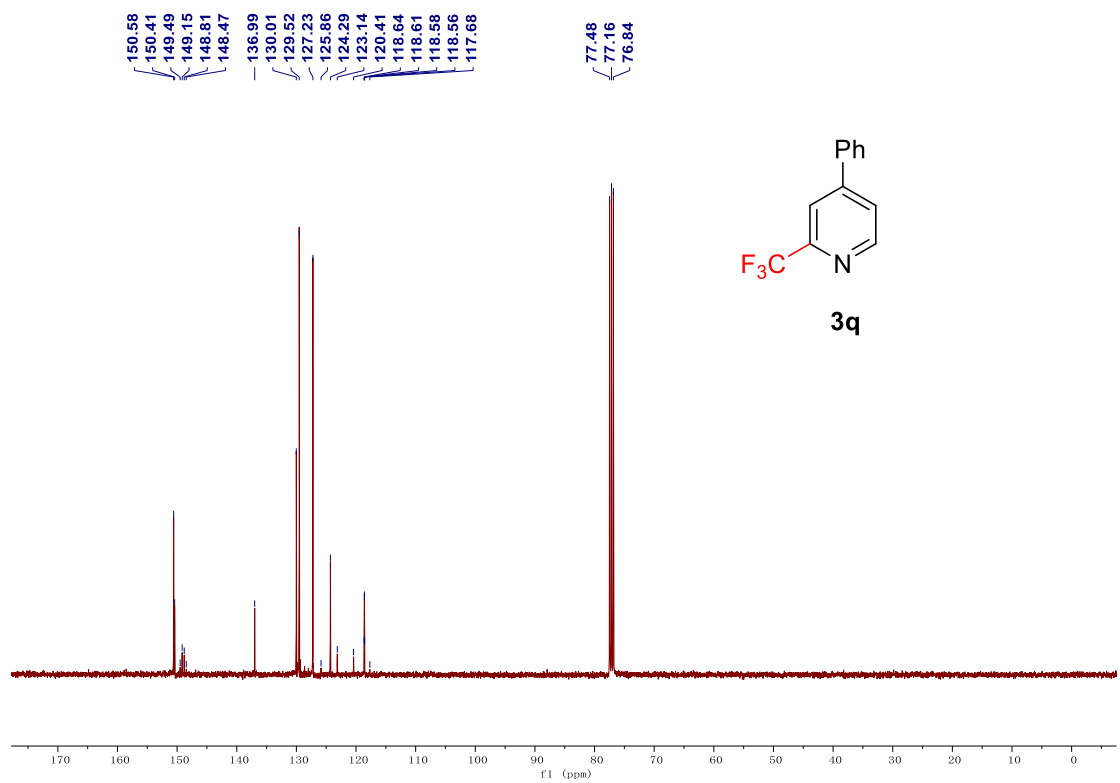



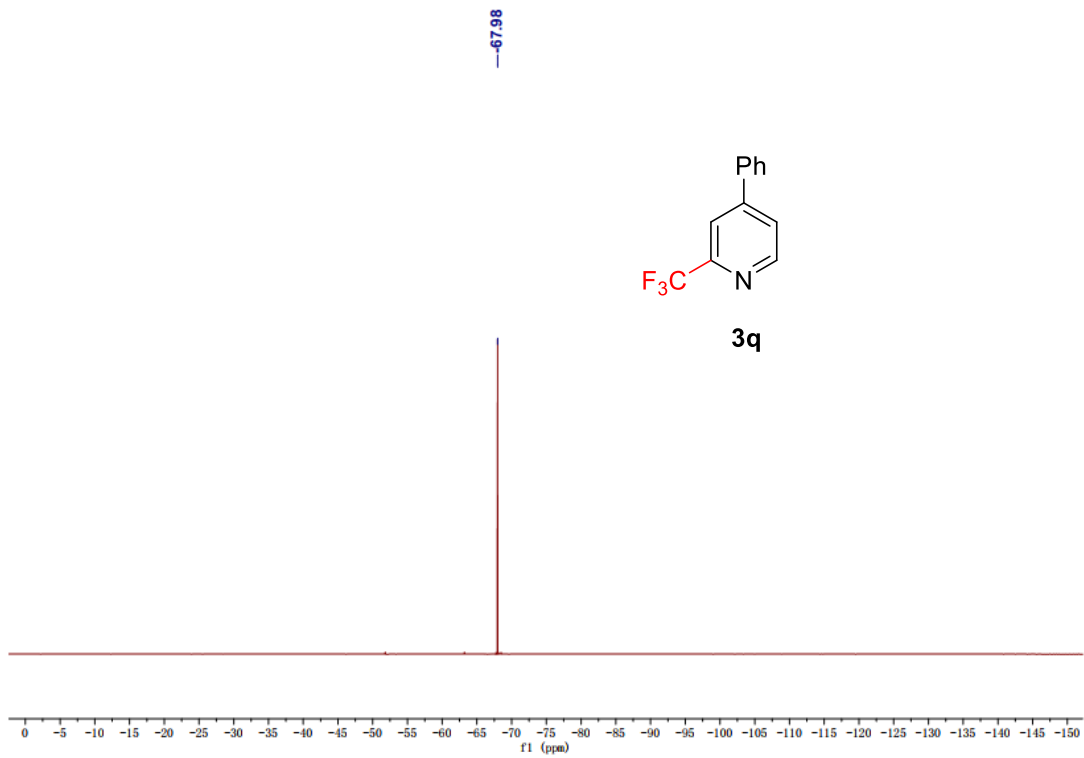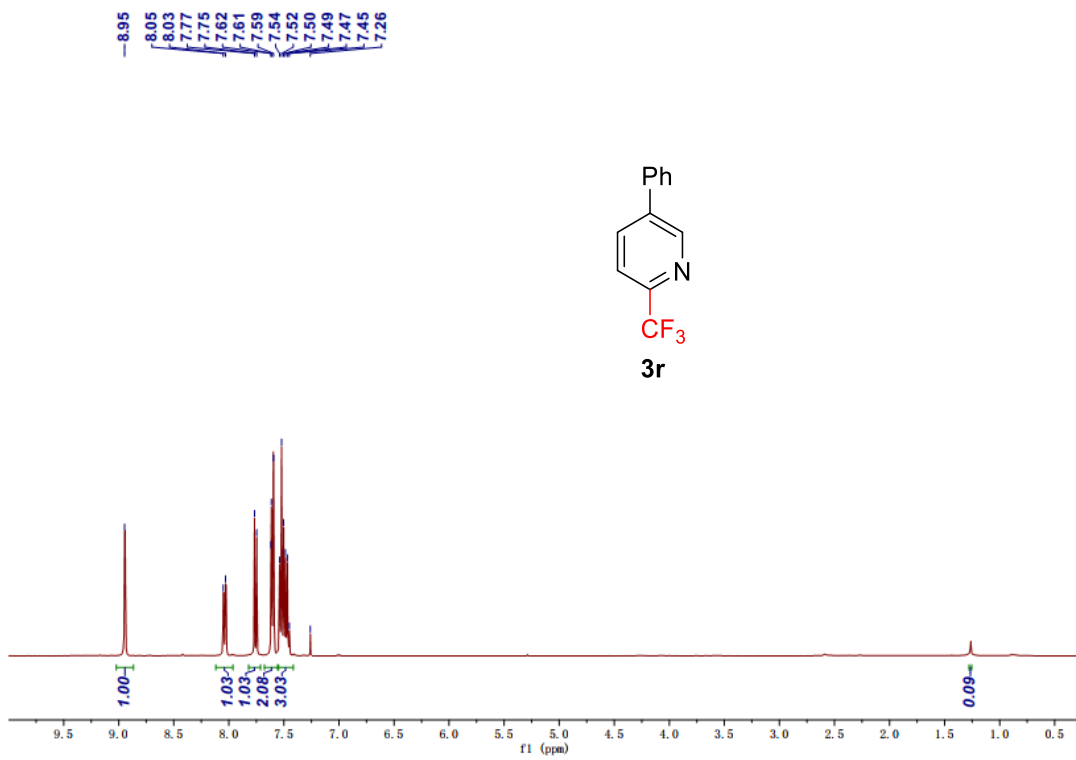

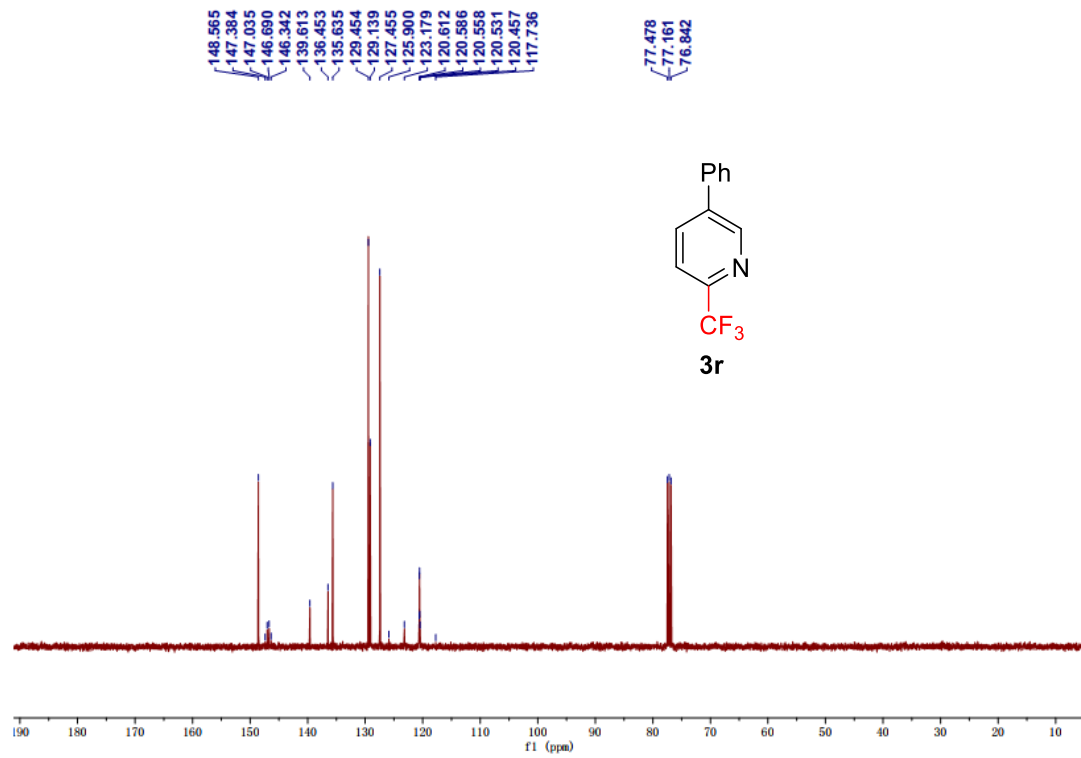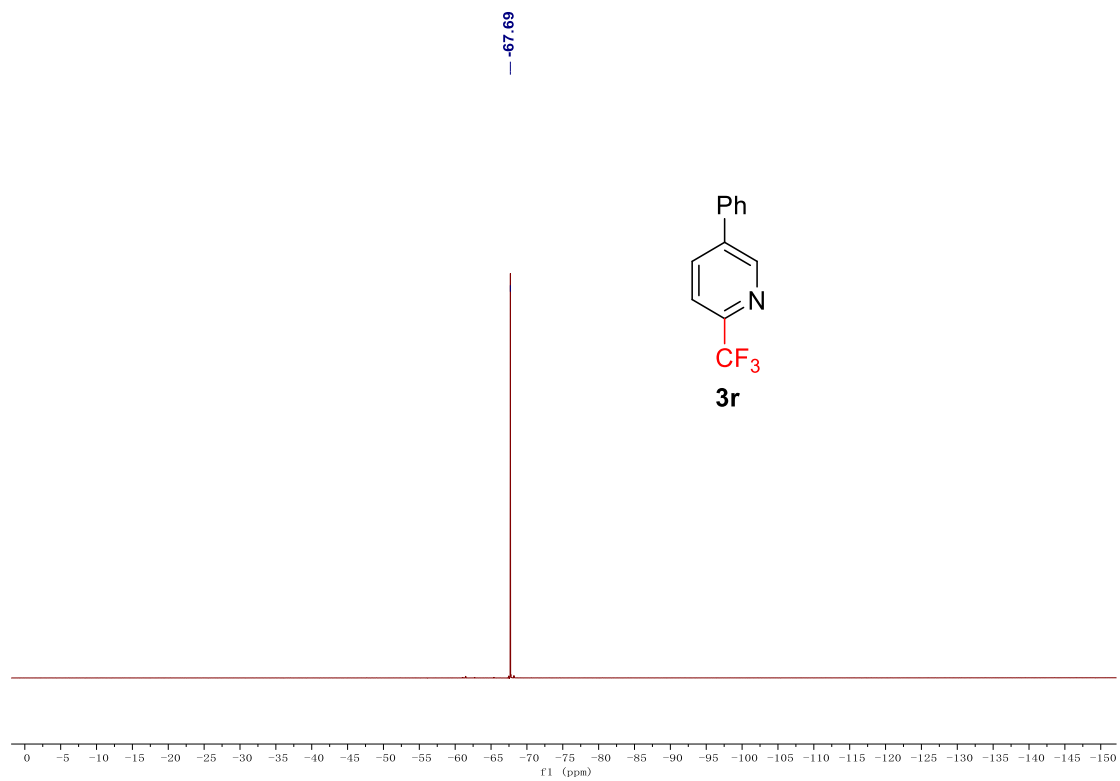

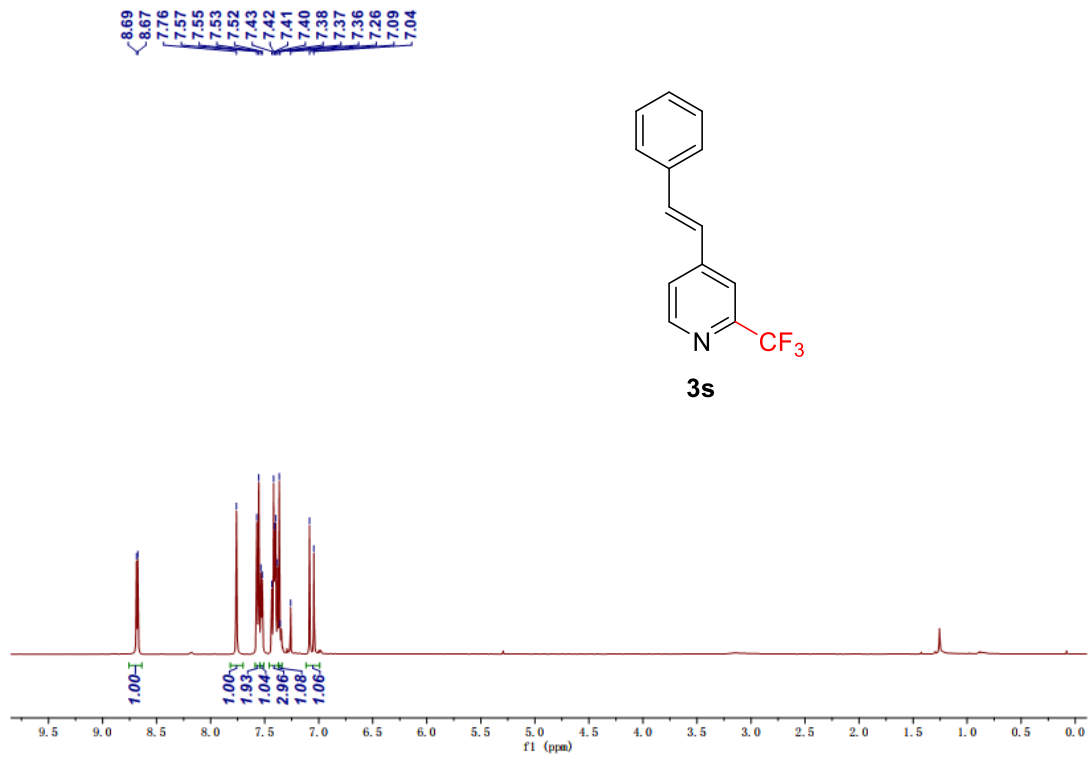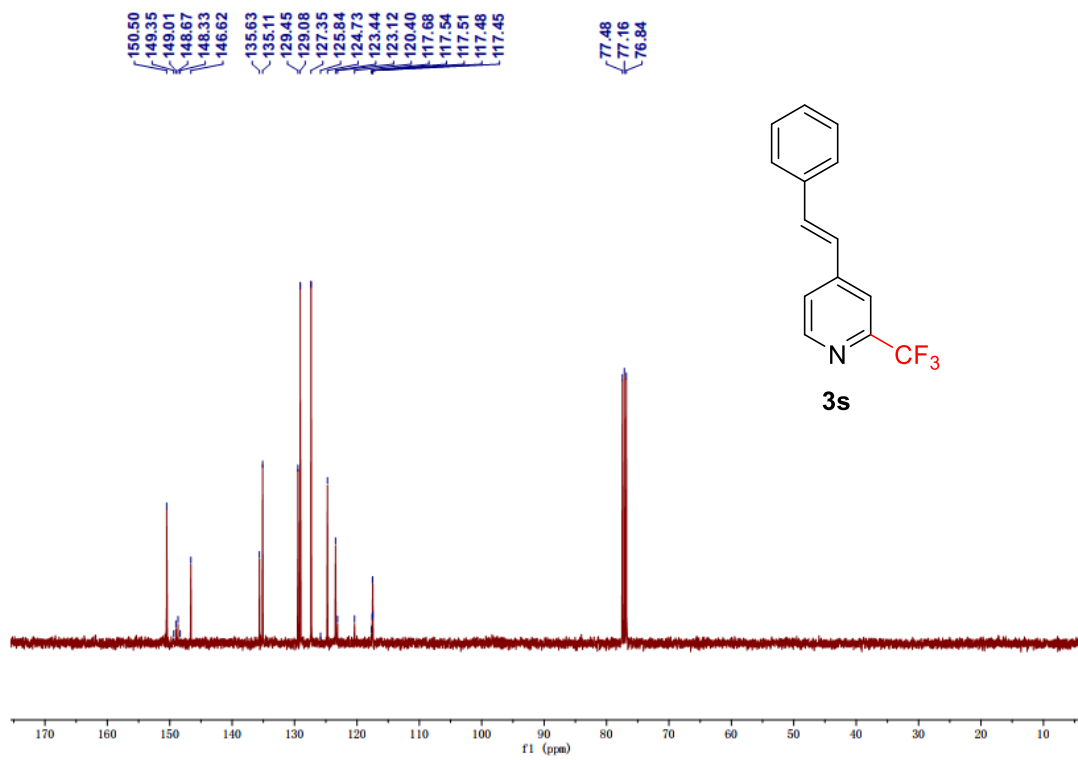

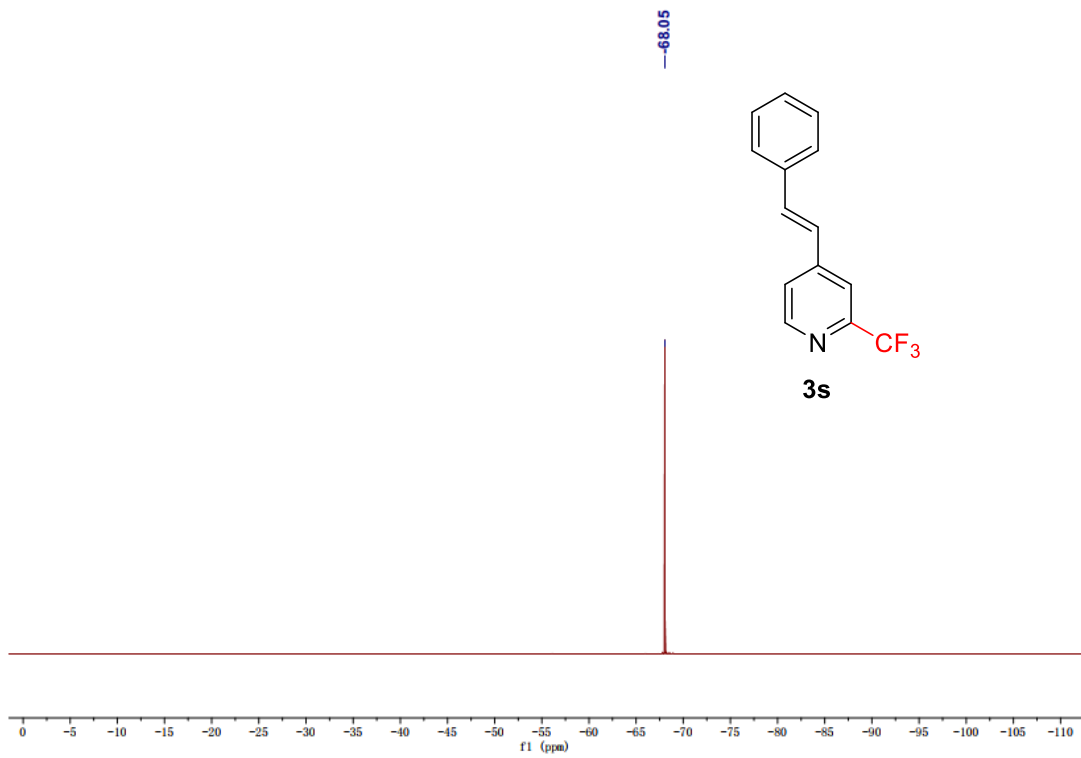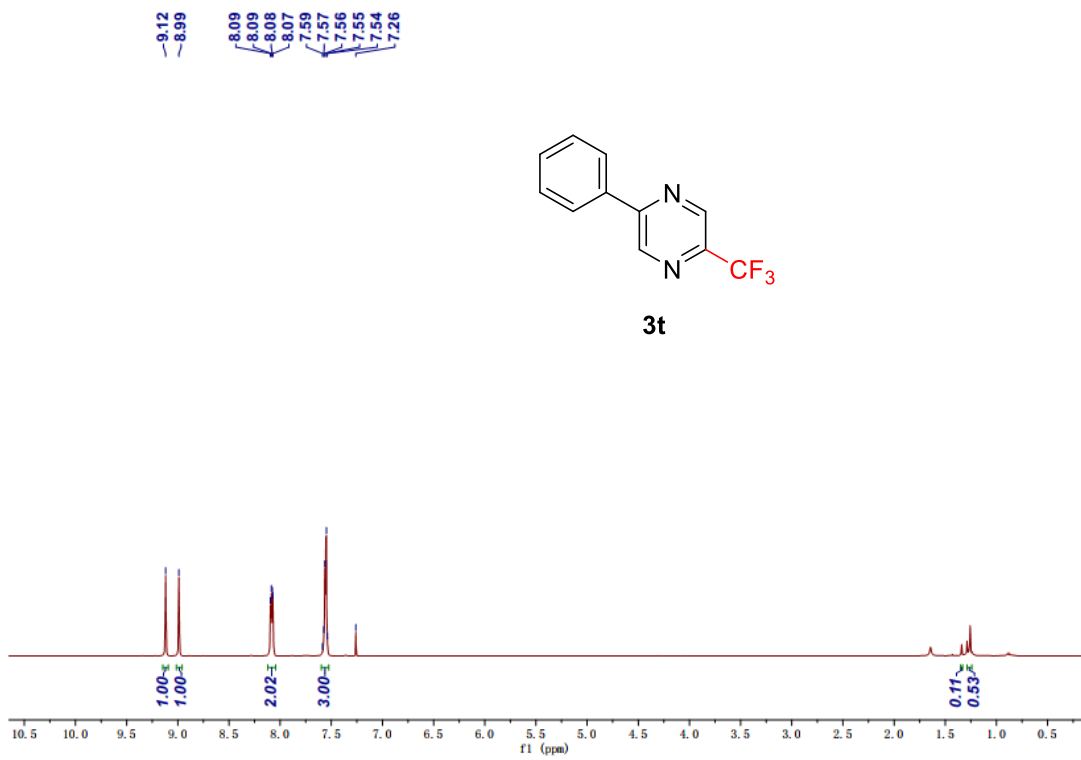

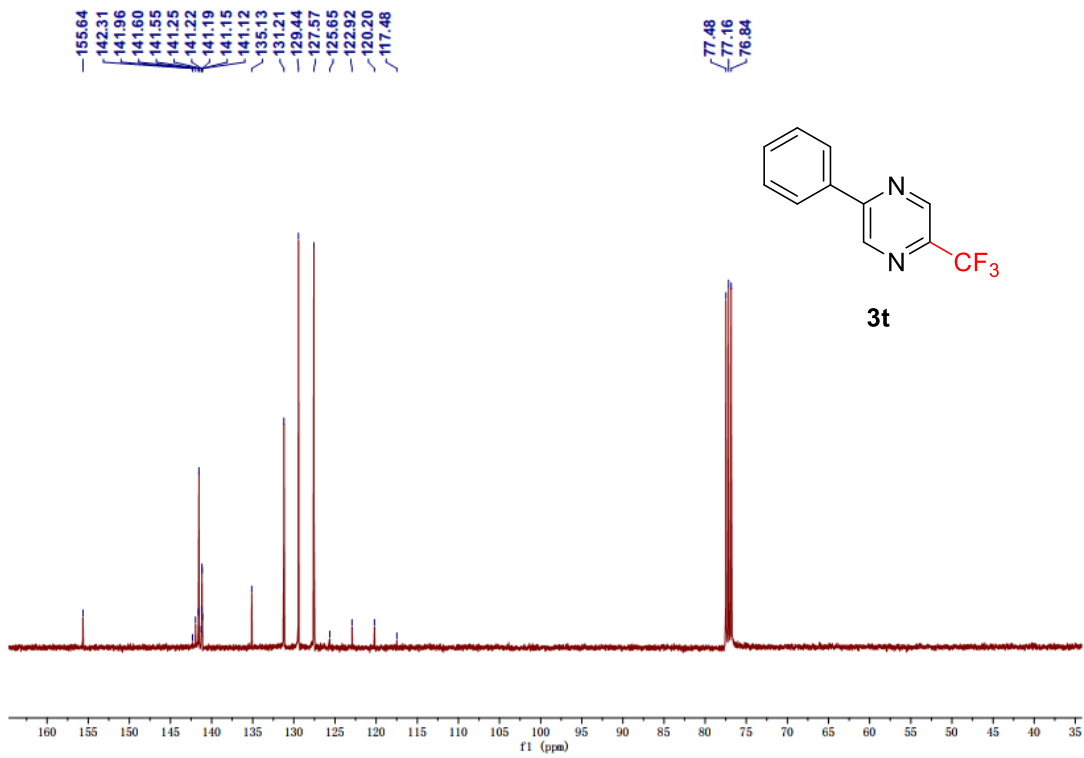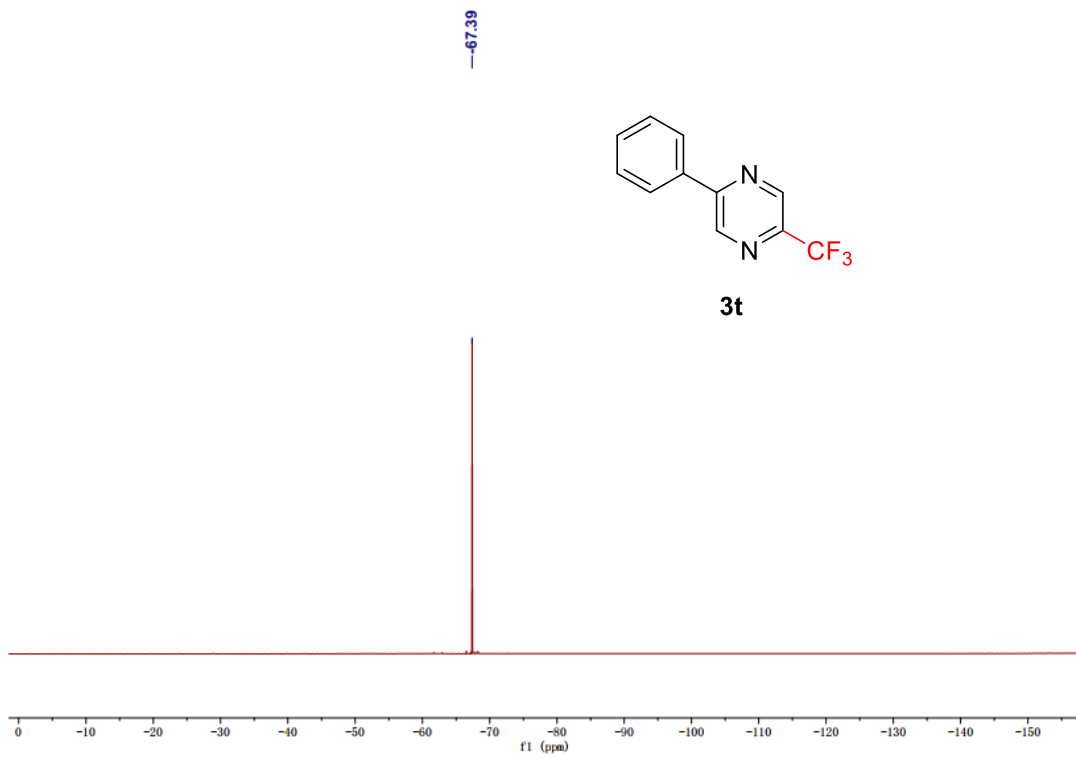

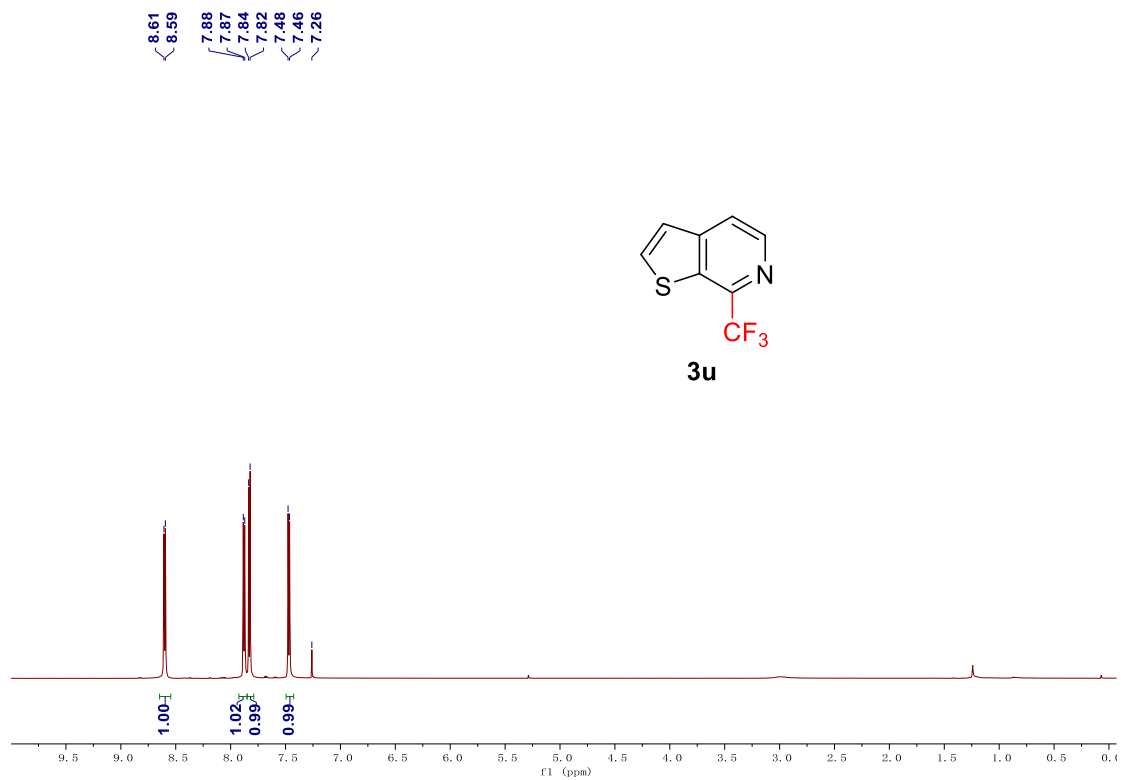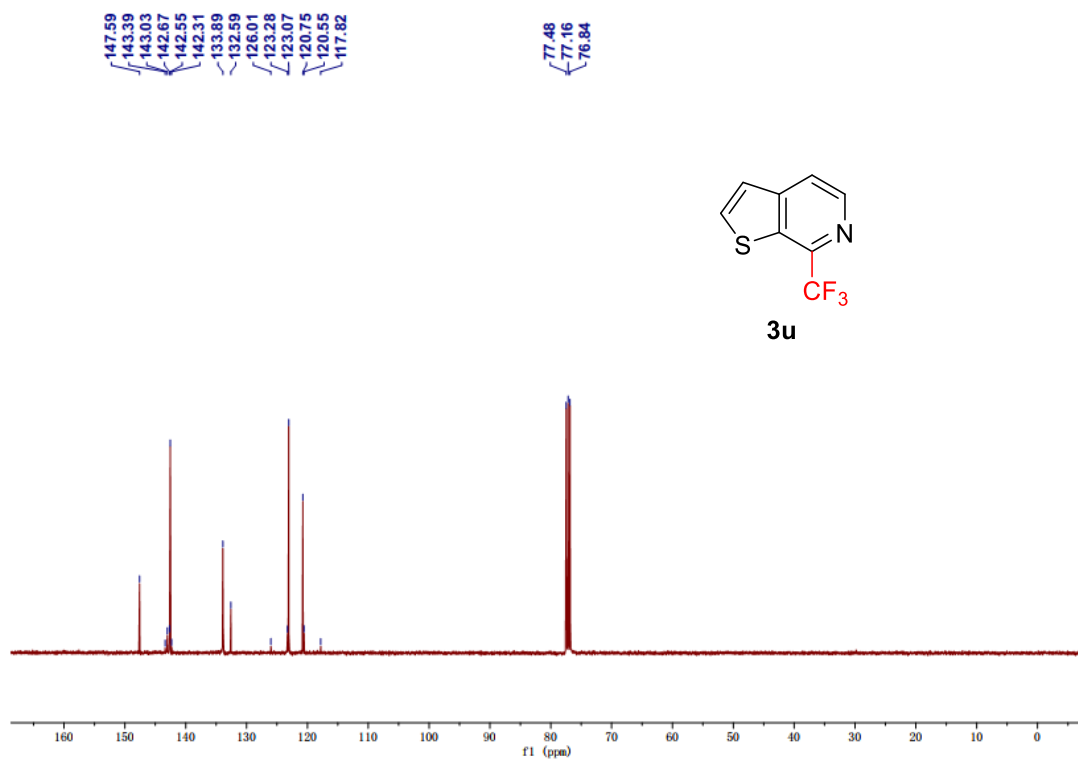

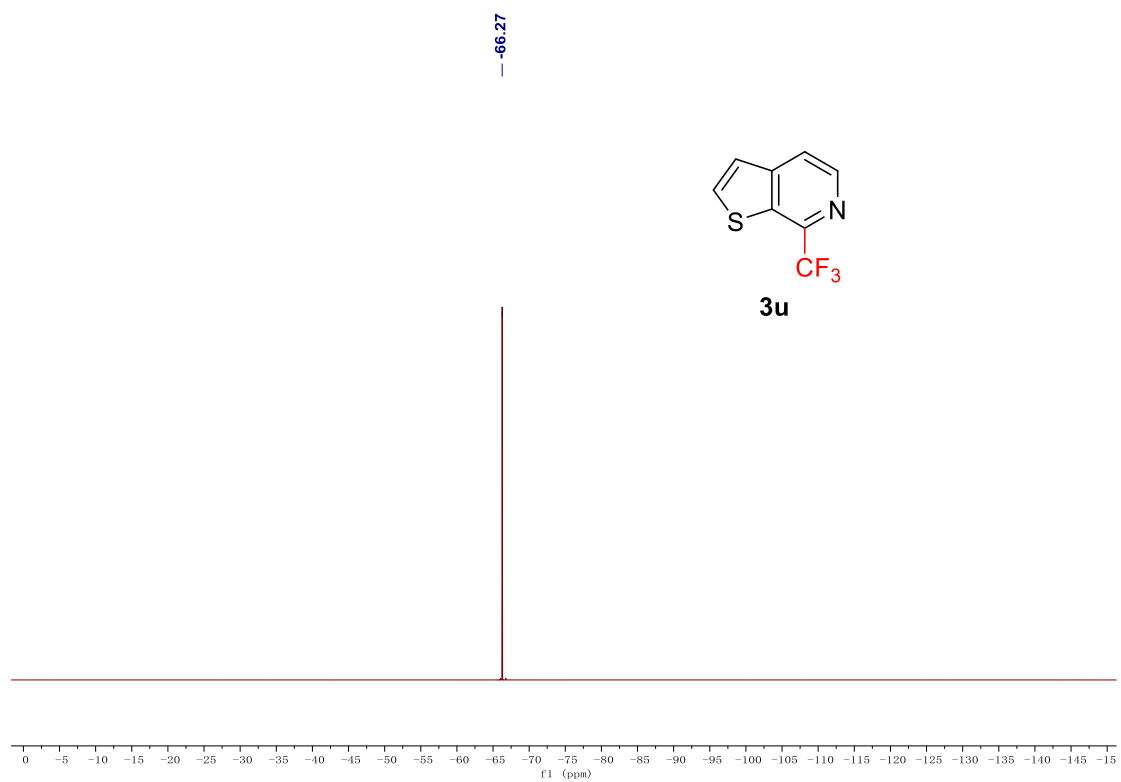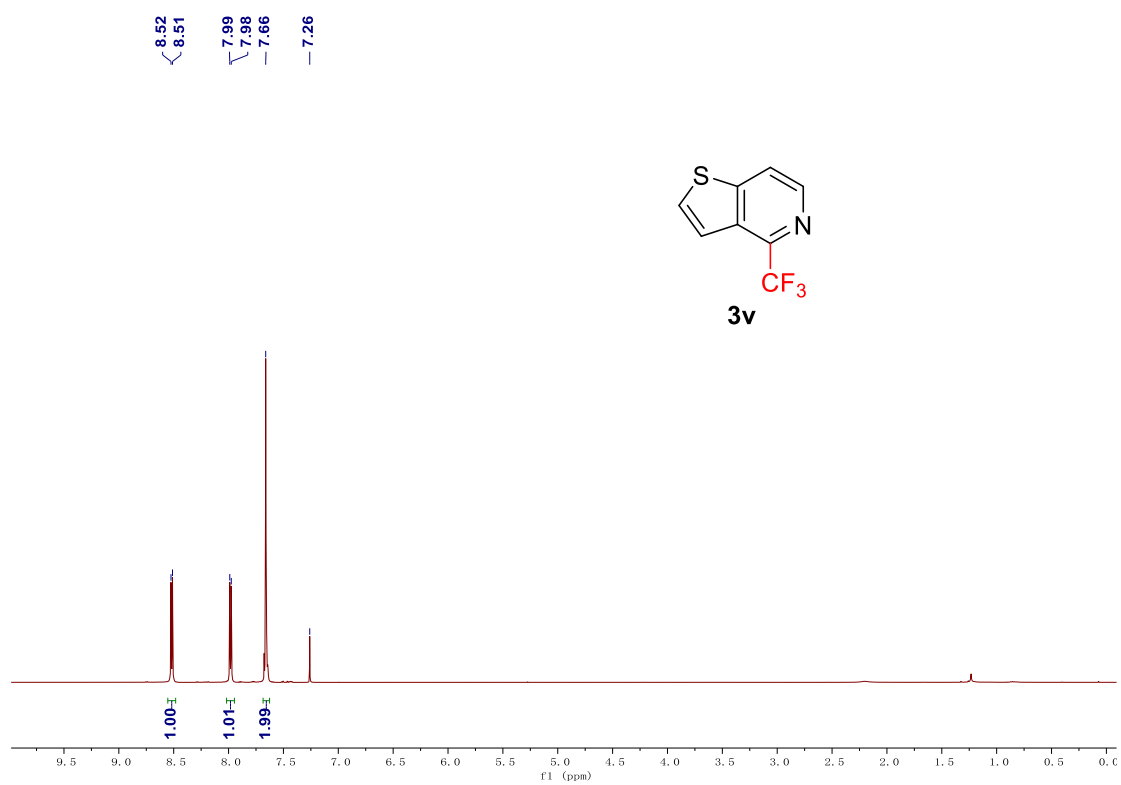

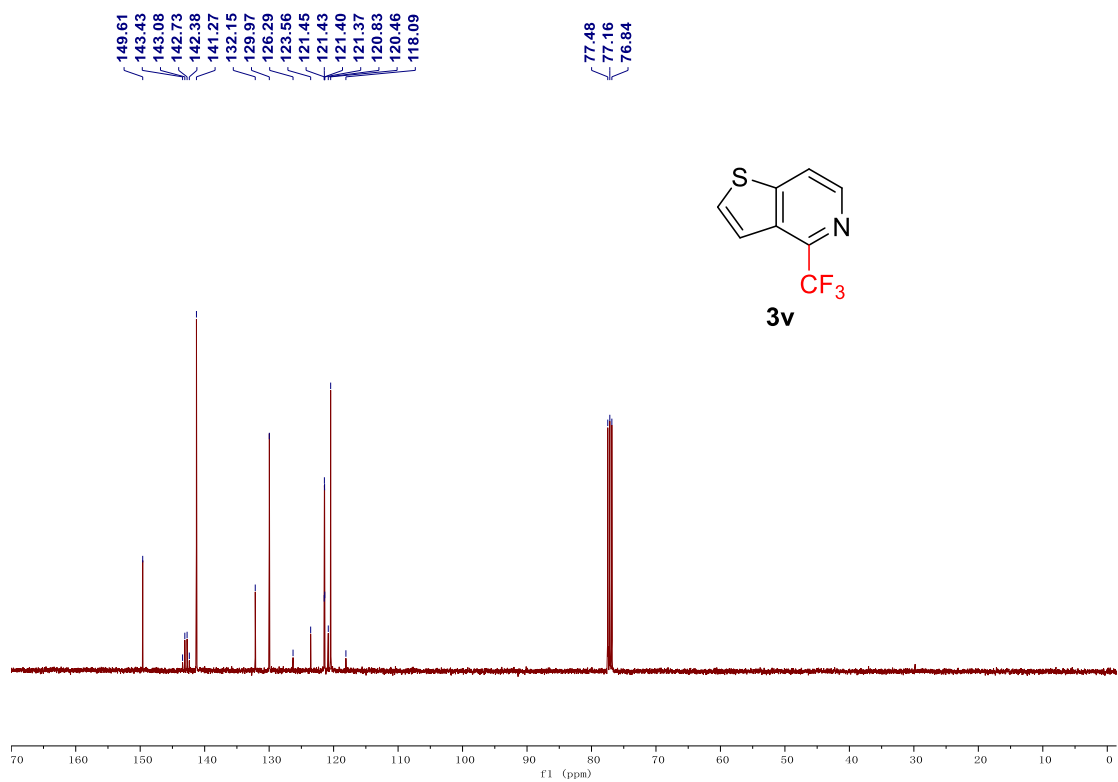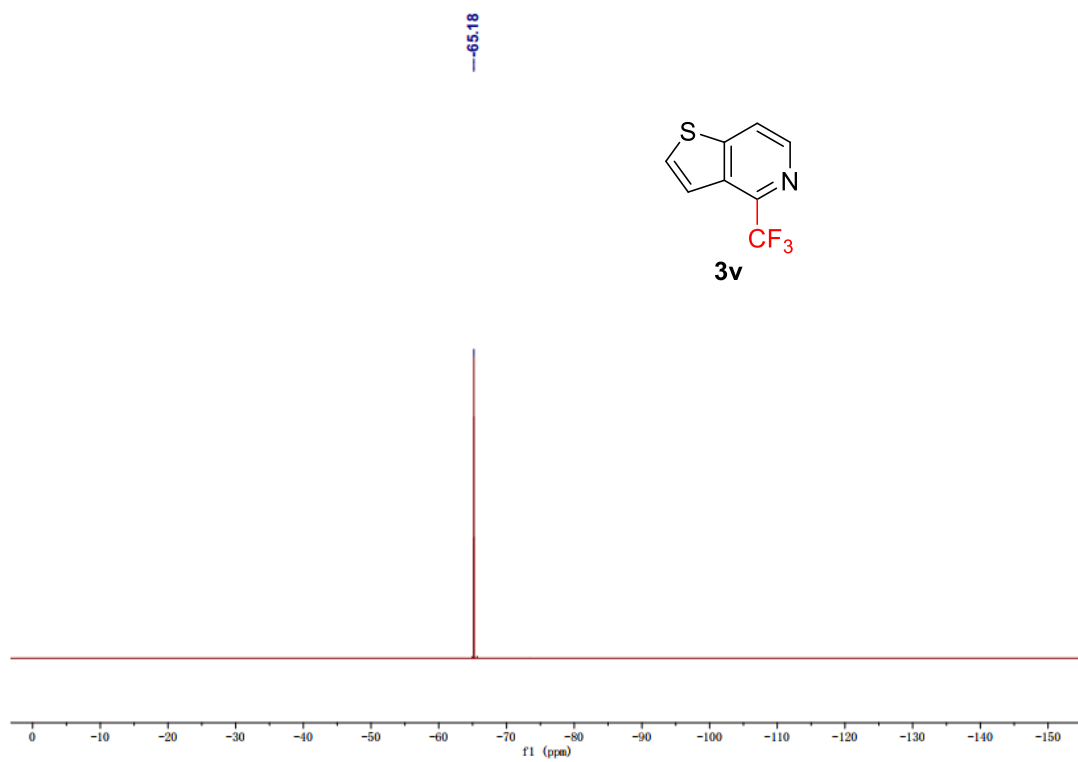



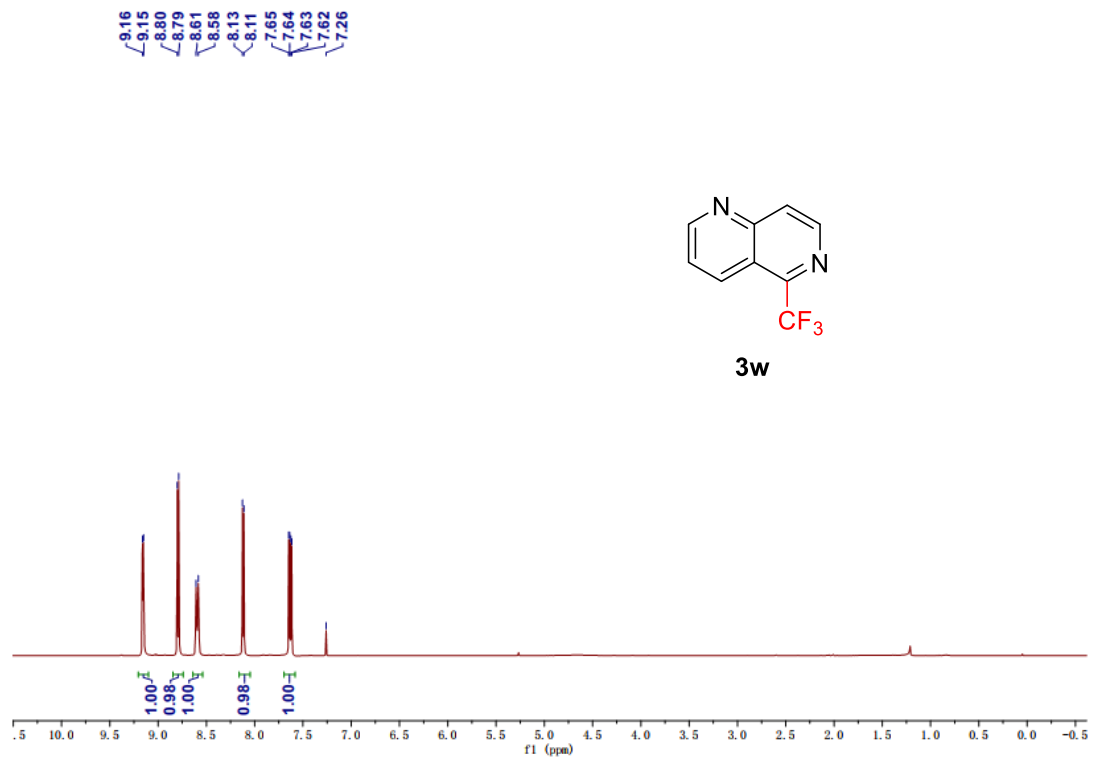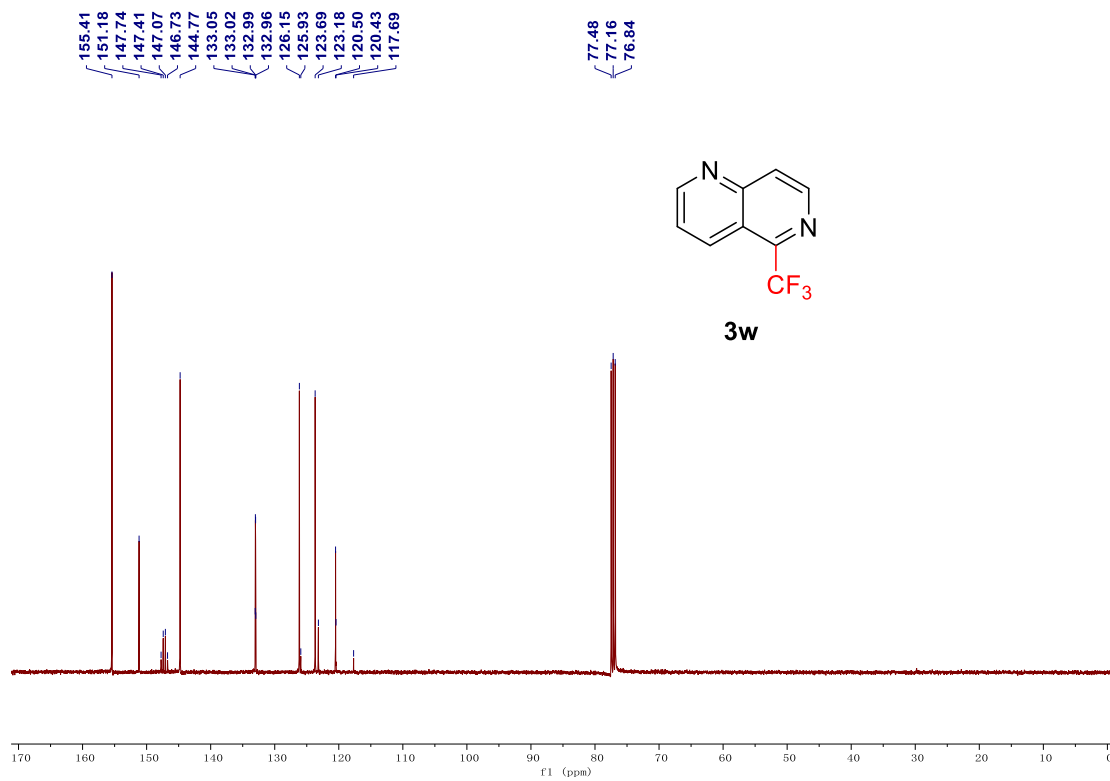

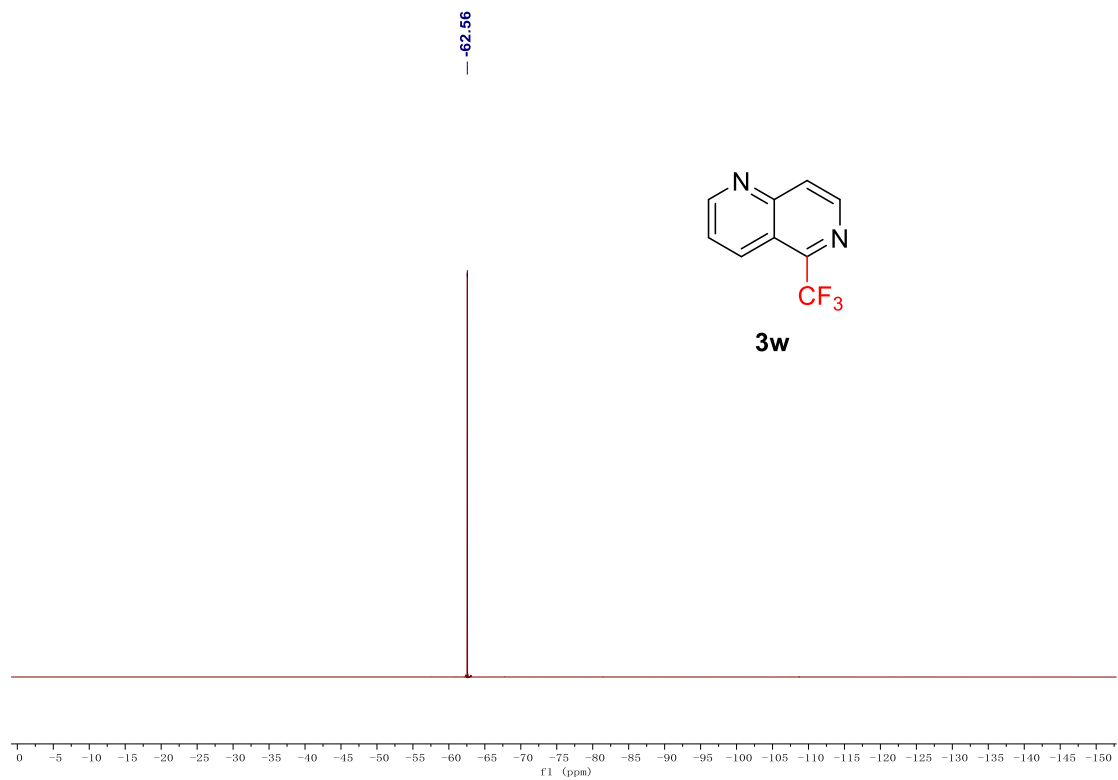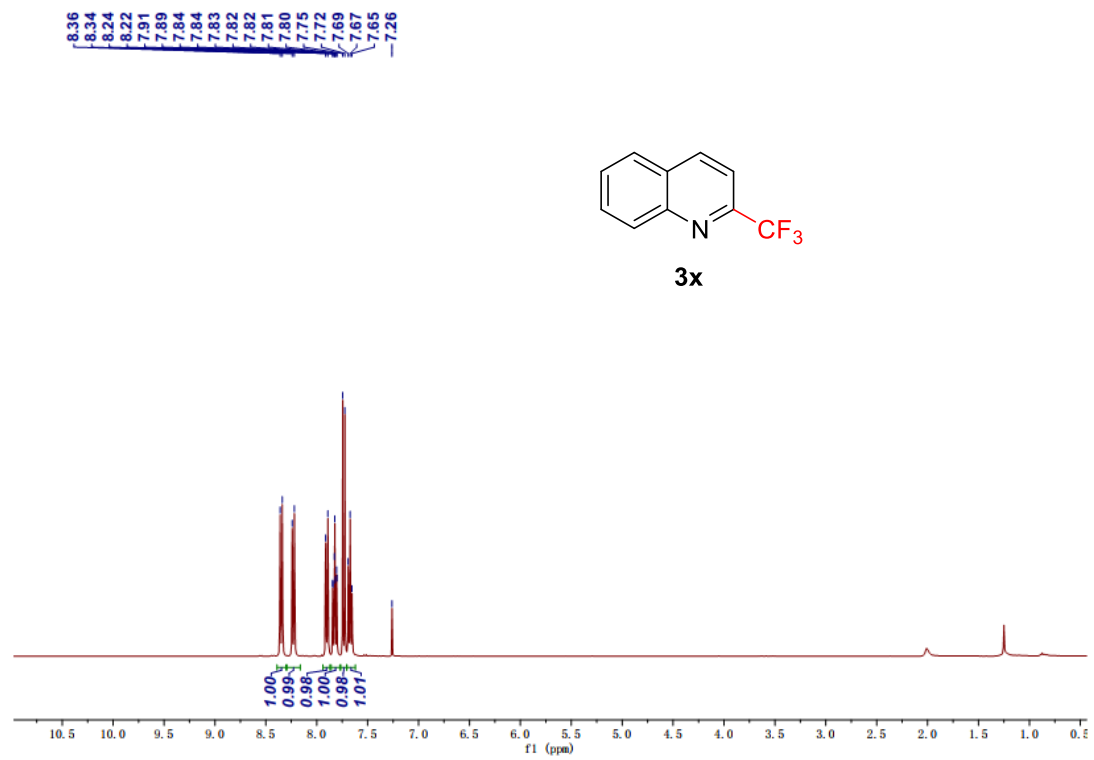

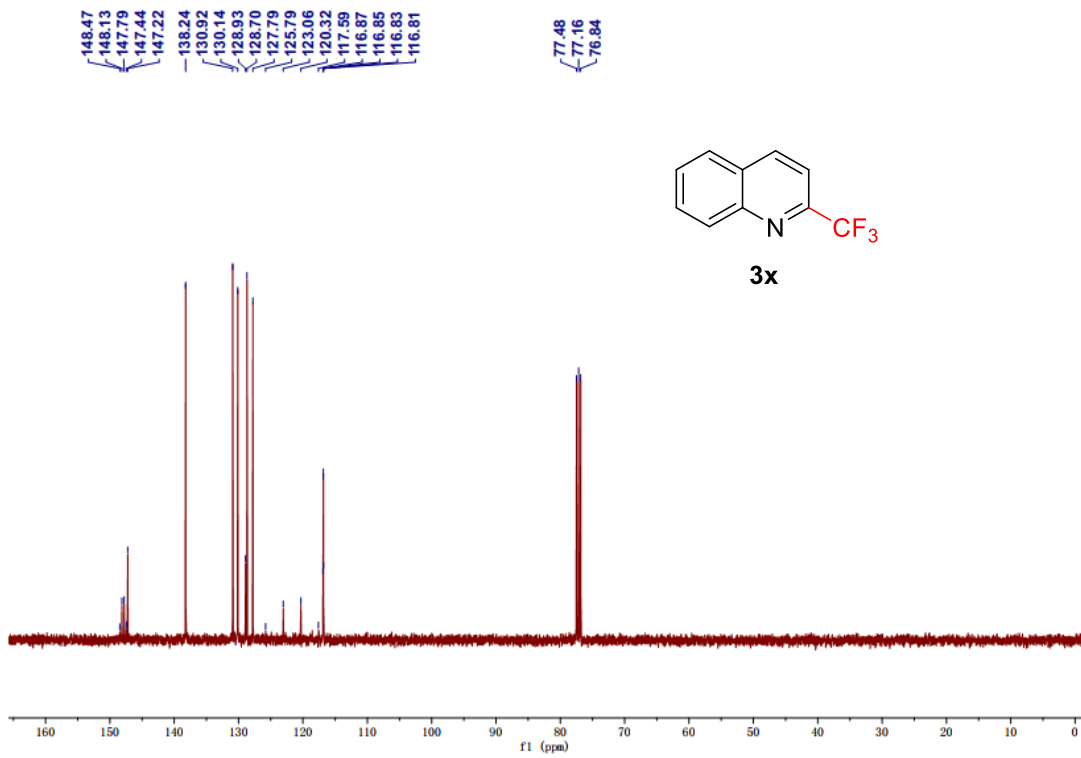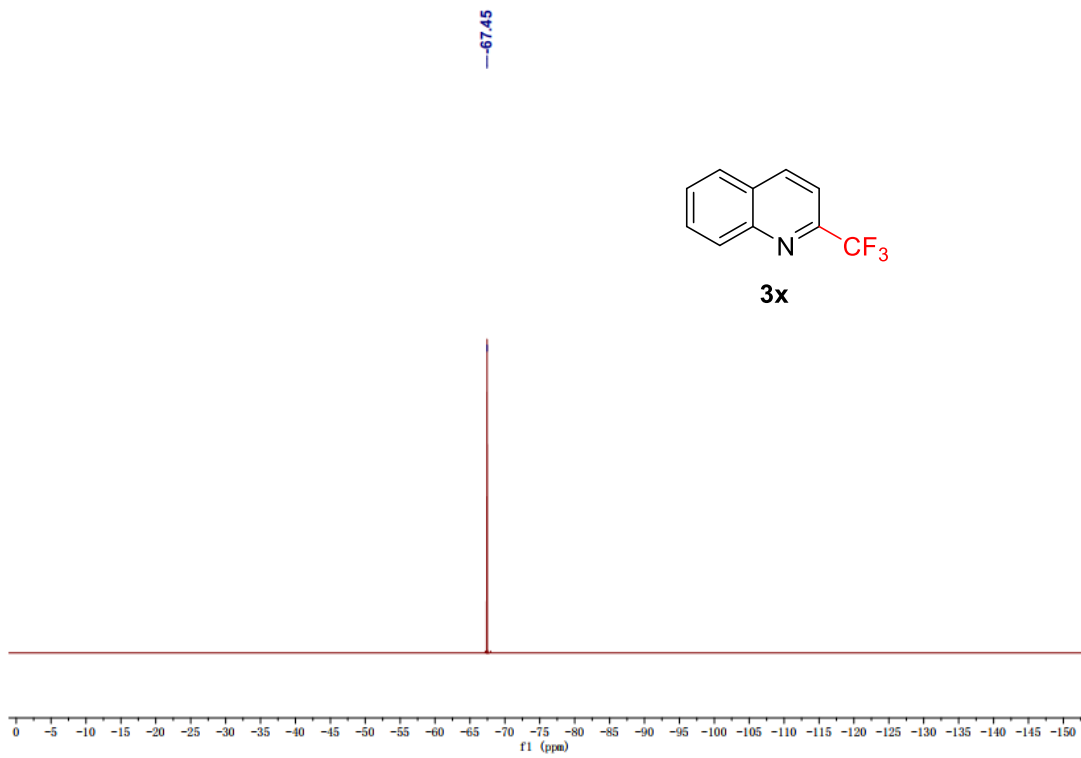

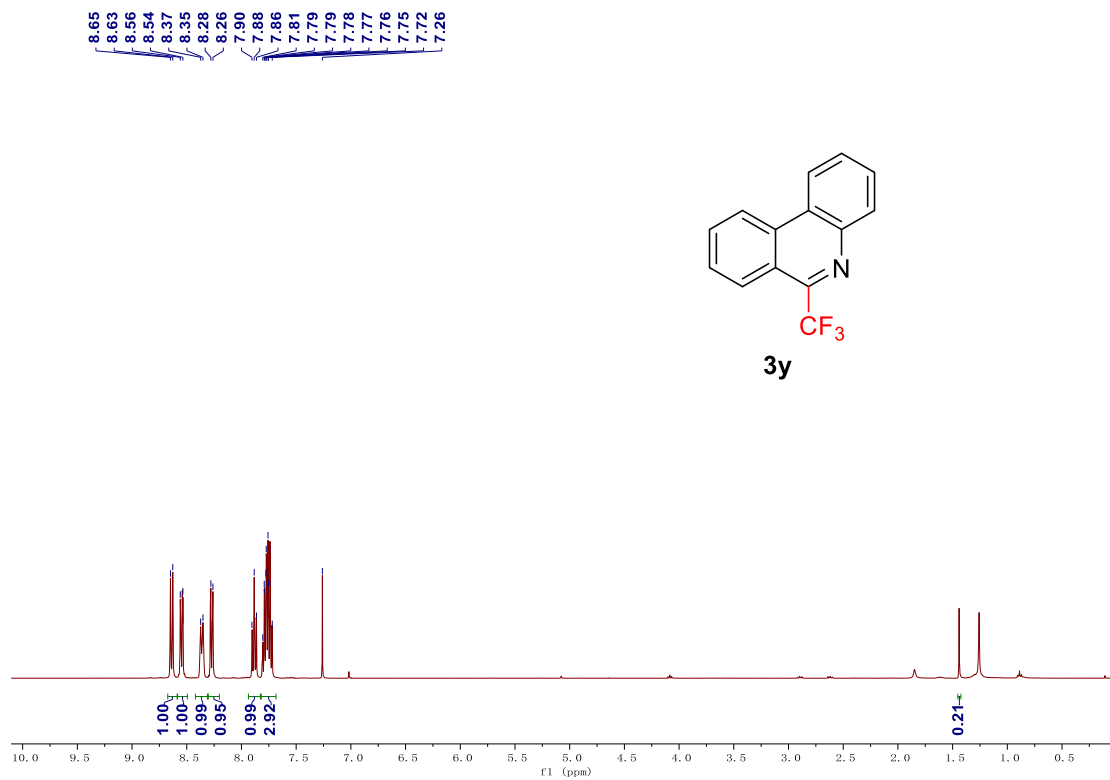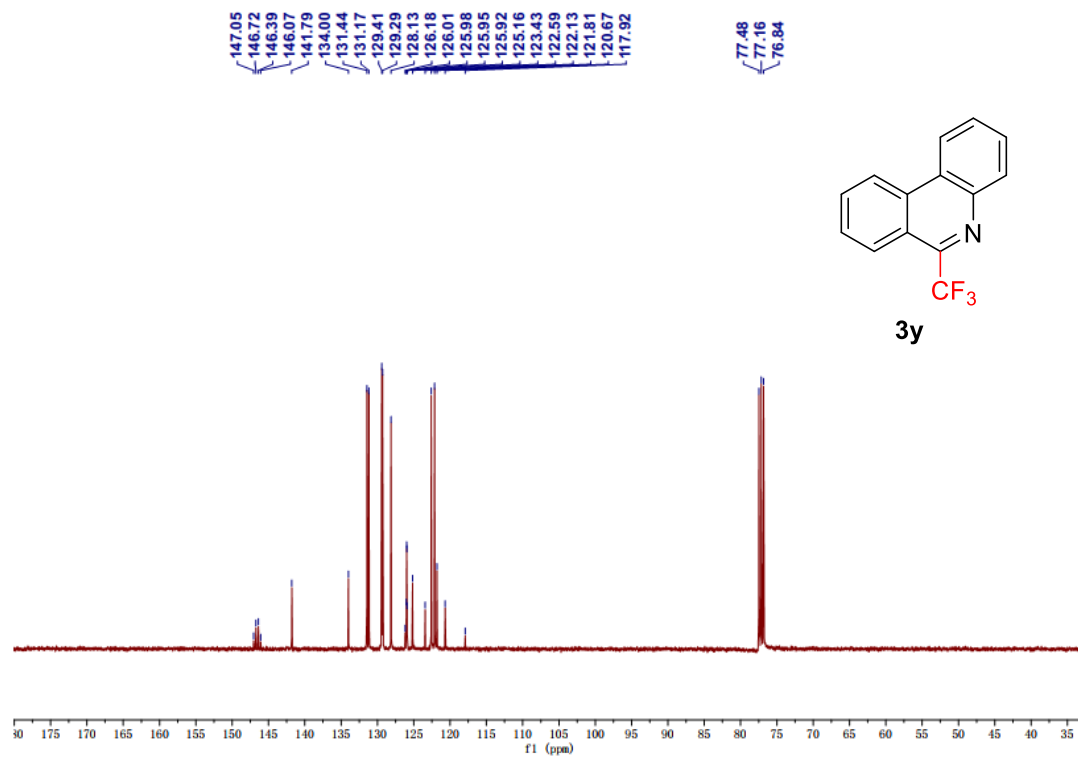

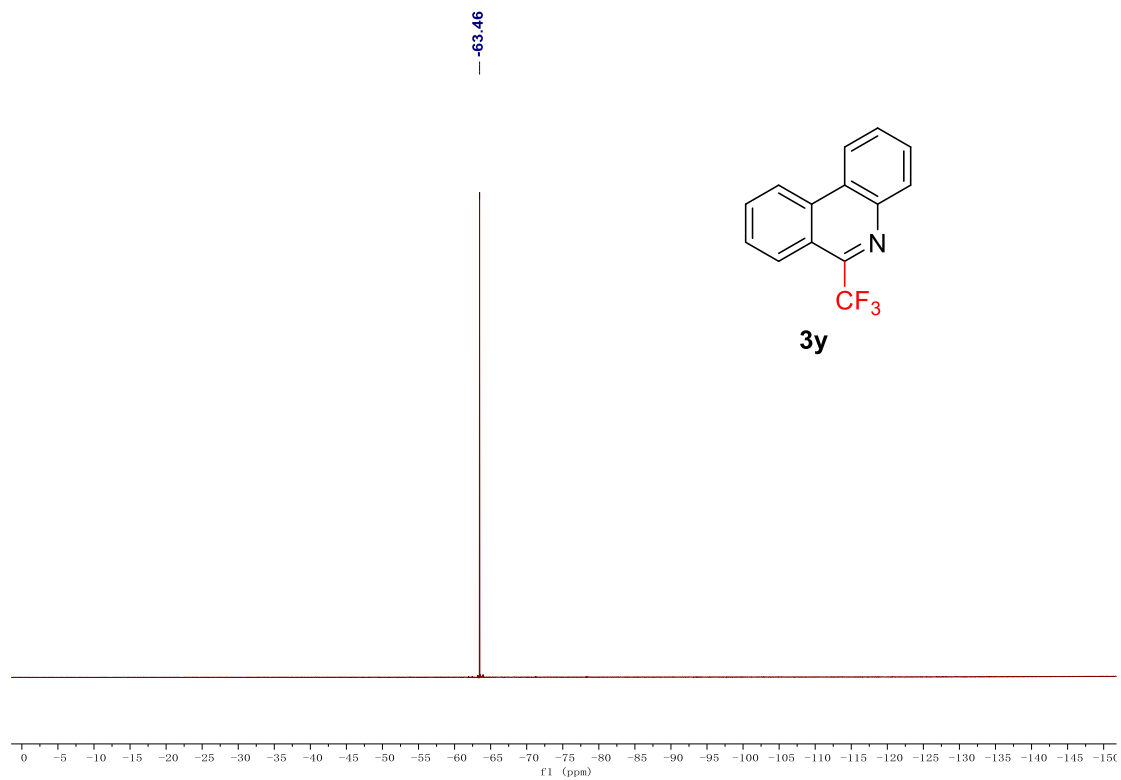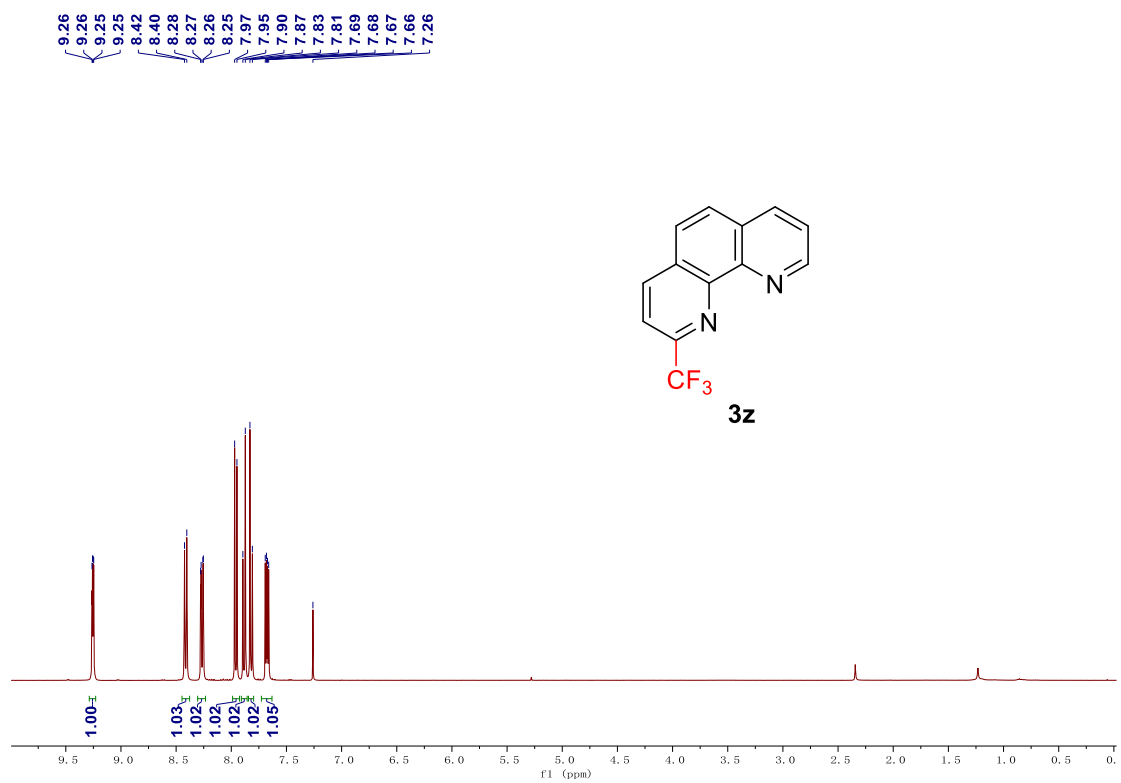

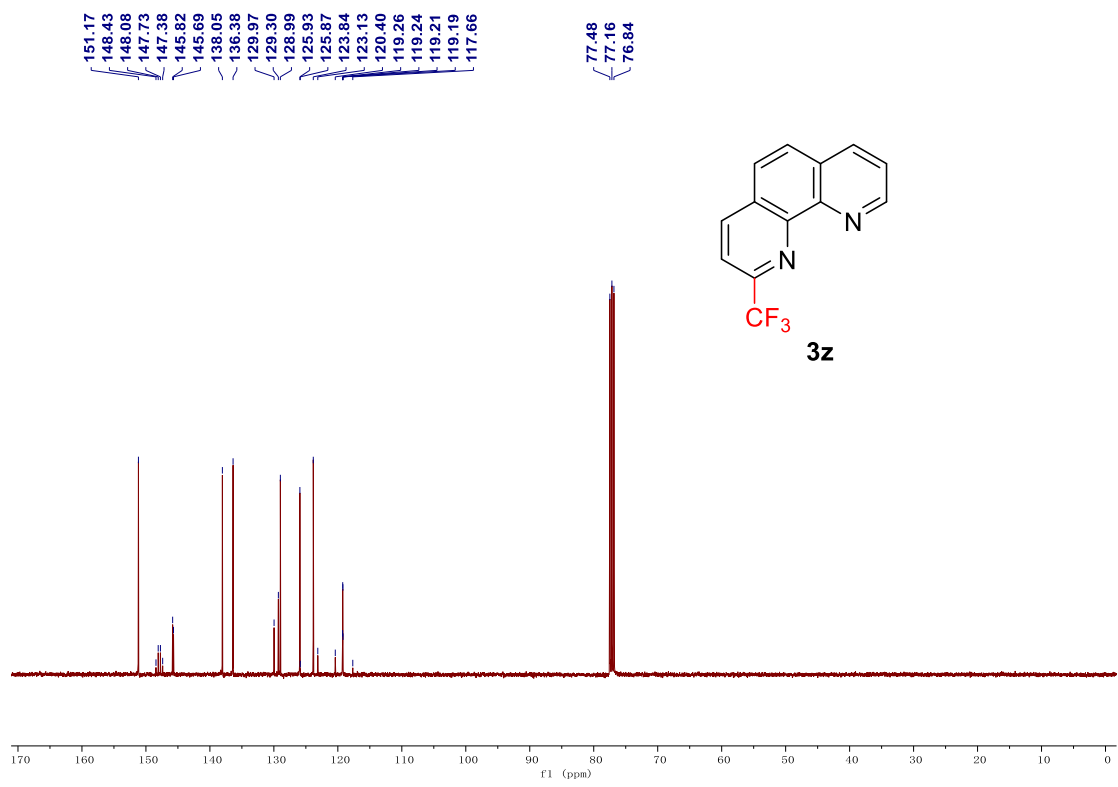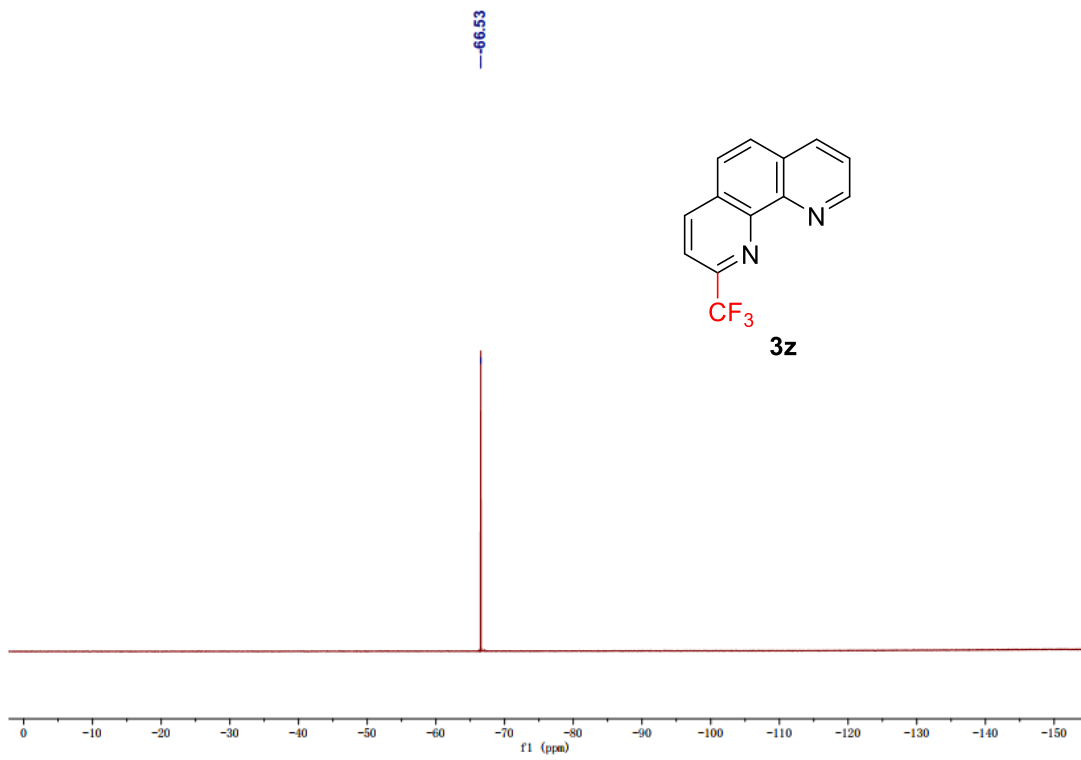

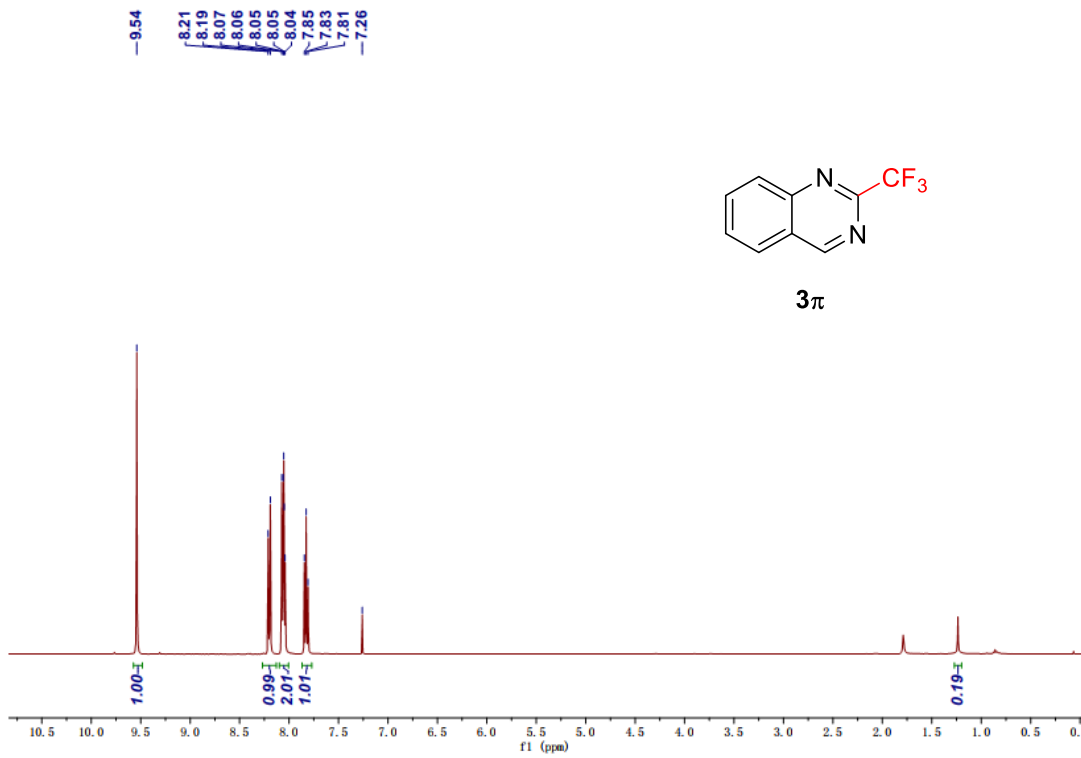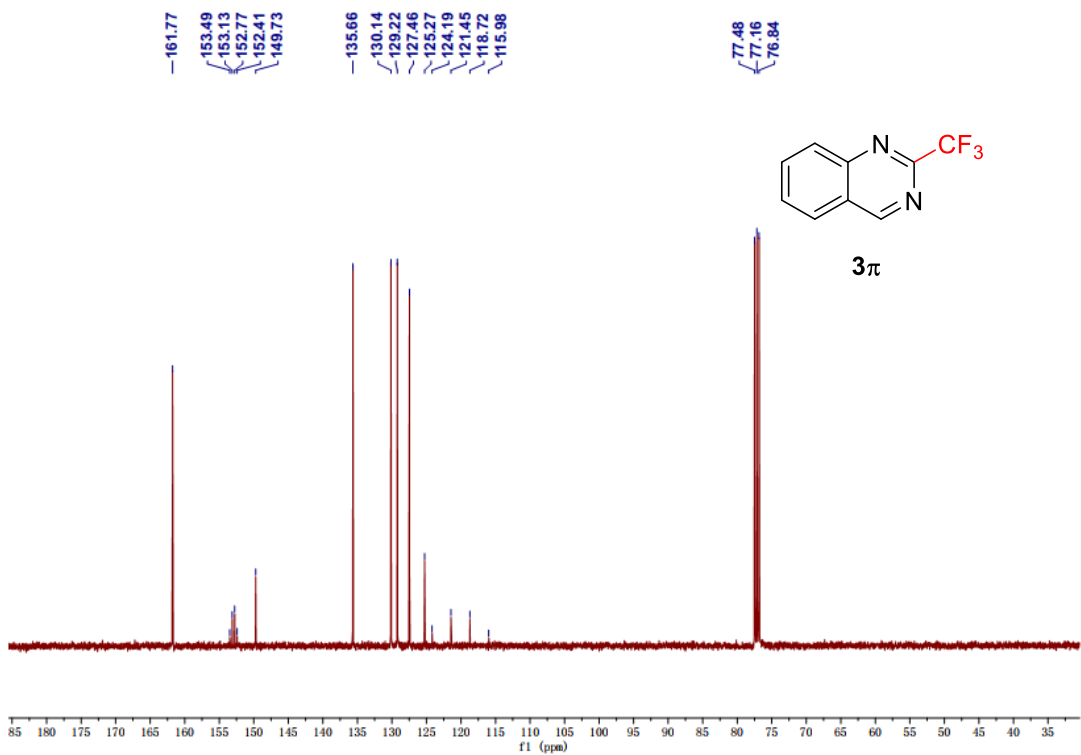

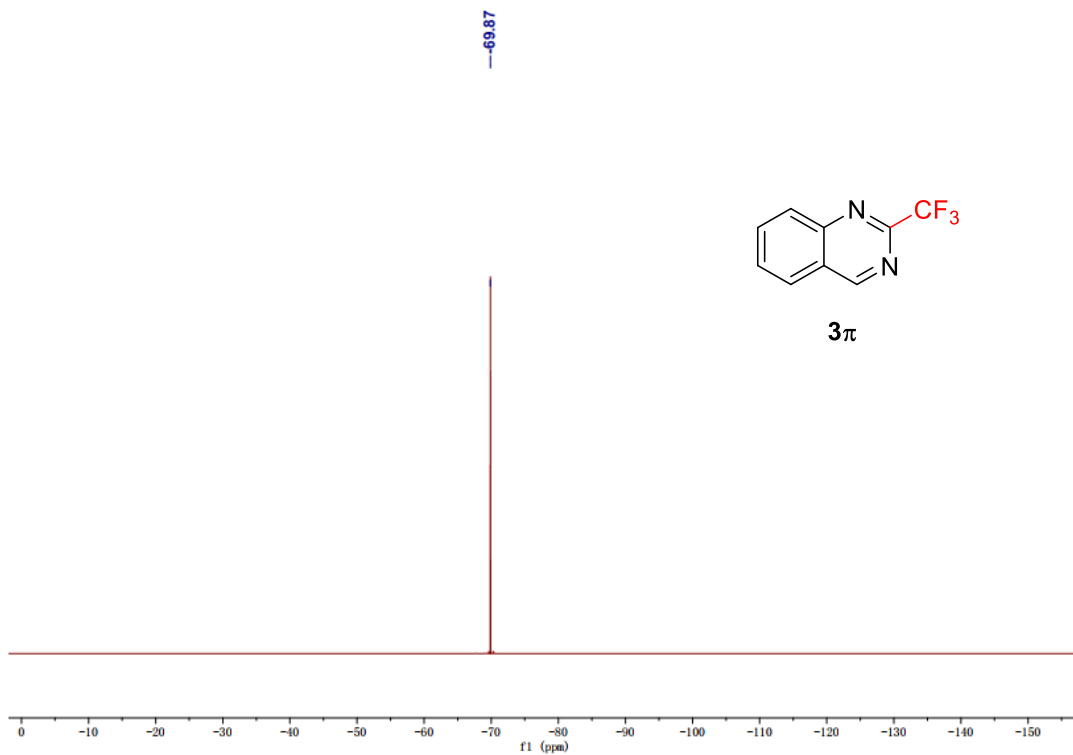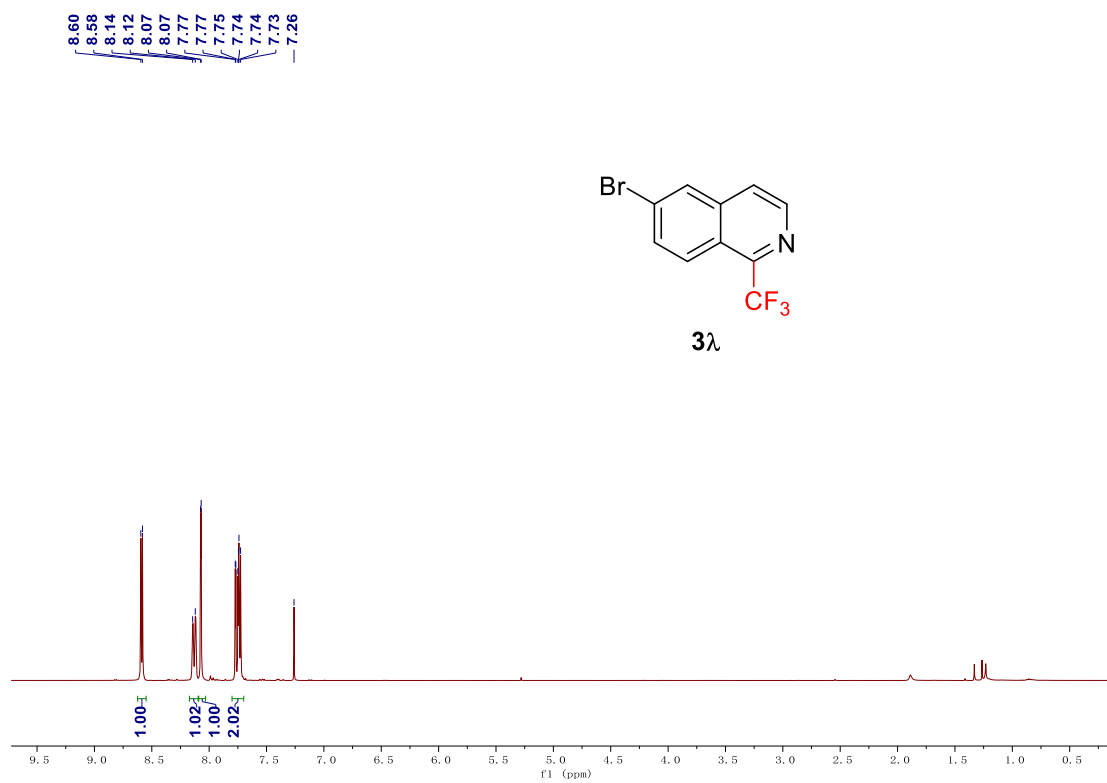



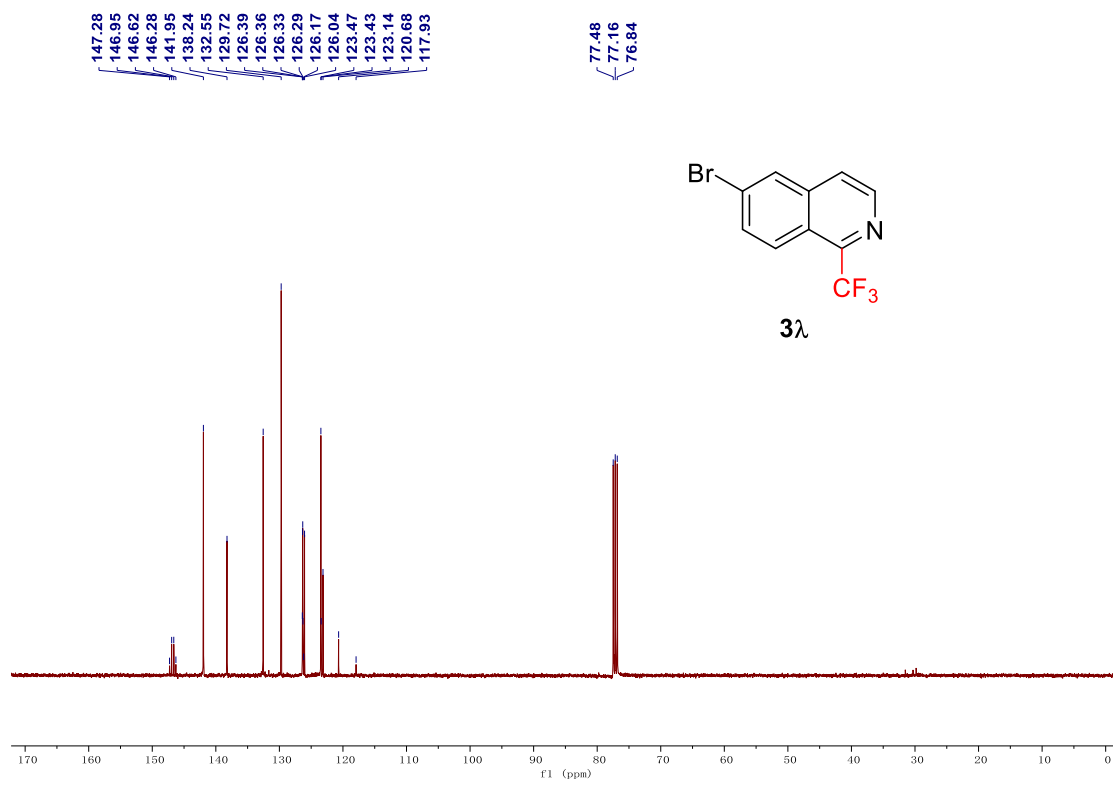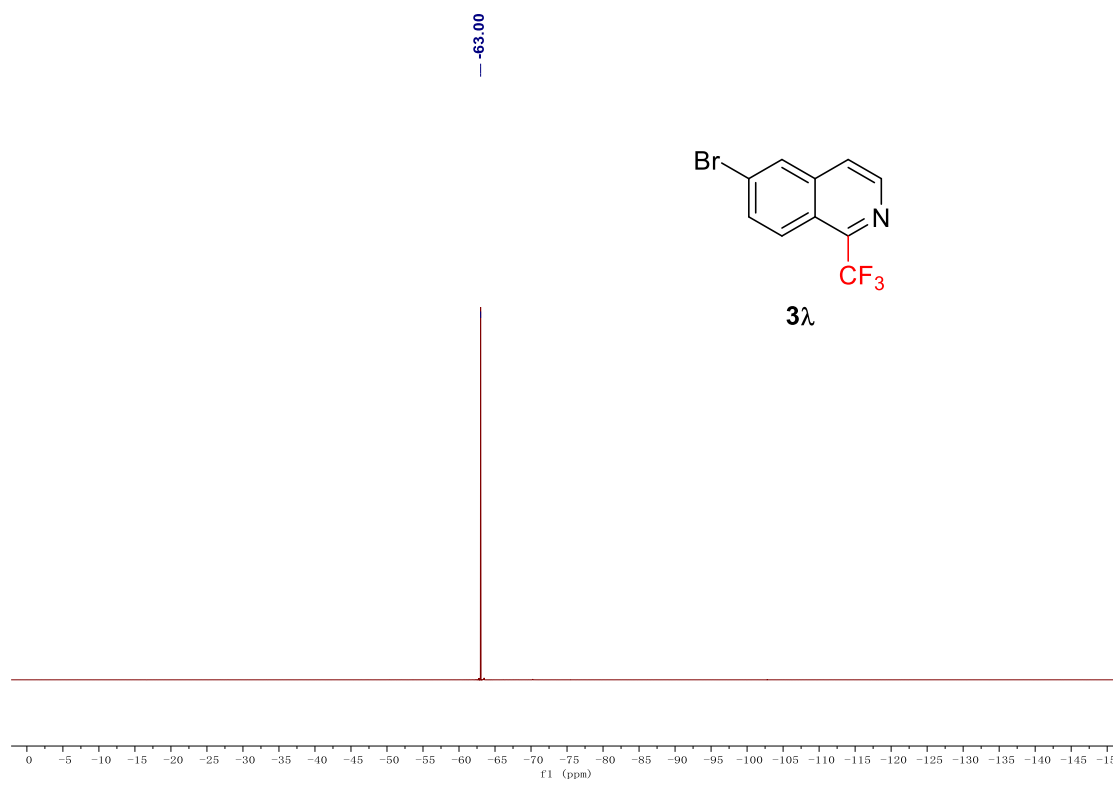

8.62  
8.60  
8.40  
8.38  
7.93  
7.91  
7.84  
7.83  
7.78  
7.77  
7.77  
7.76  
7.75  
7.74  
7.72  
7.72  
7.71  
7.70  
7.70  
7.68  
7.68  
7.26

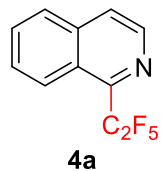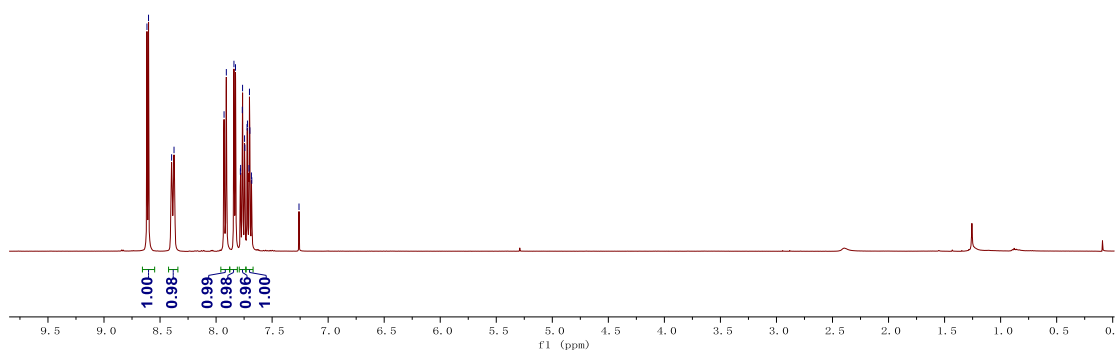

146.64  
146.39  
146.14  
140.84  
137.37  
130.87  
128.92  
127.87  
125.97  
124.98  
124.92  
124.86  
124.60  
124.60  
123.64  
123.29  
121.15  
120.79  
120.44  
118.30  
117.95  
117.59  
116.74  
116.37  
116.01  
115.64  
115.45  
115.10  
114.74  
114.20  
113.84  
113.47  
113.10  
111.67  
111.30  
110.93  
110.57  
77.48  
77.16  
76.84

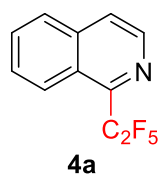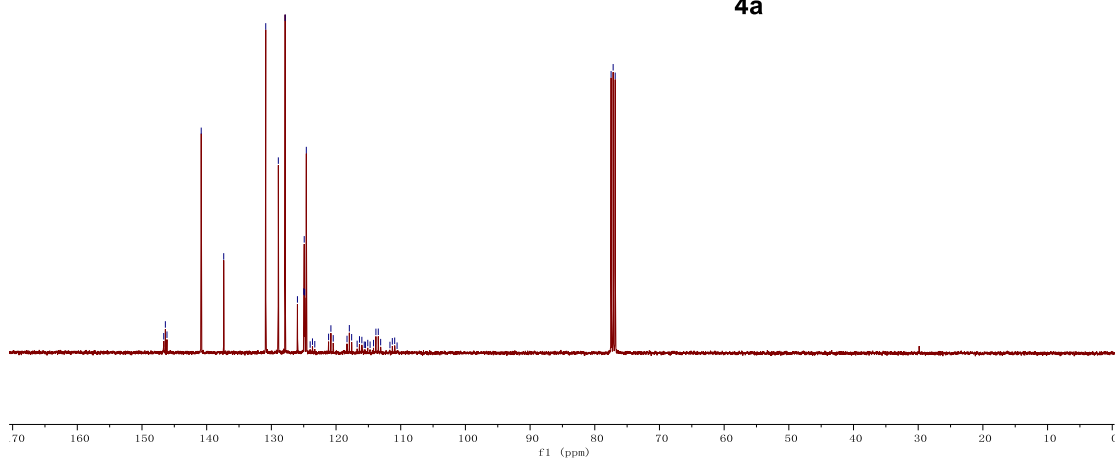

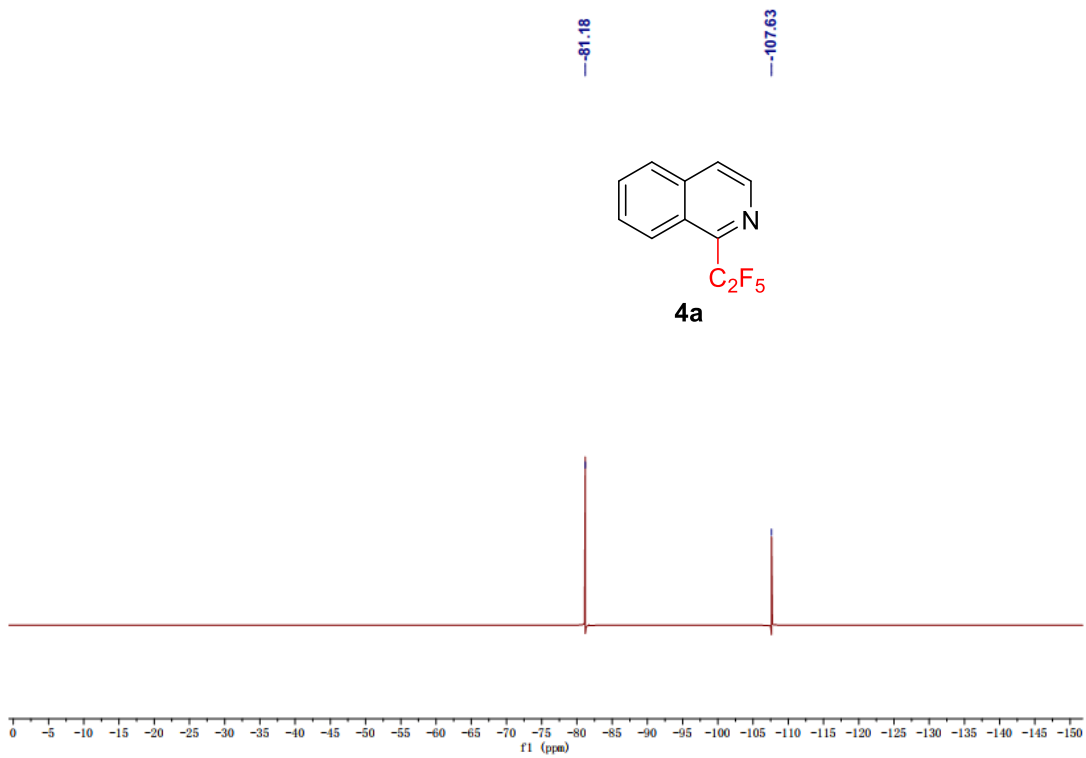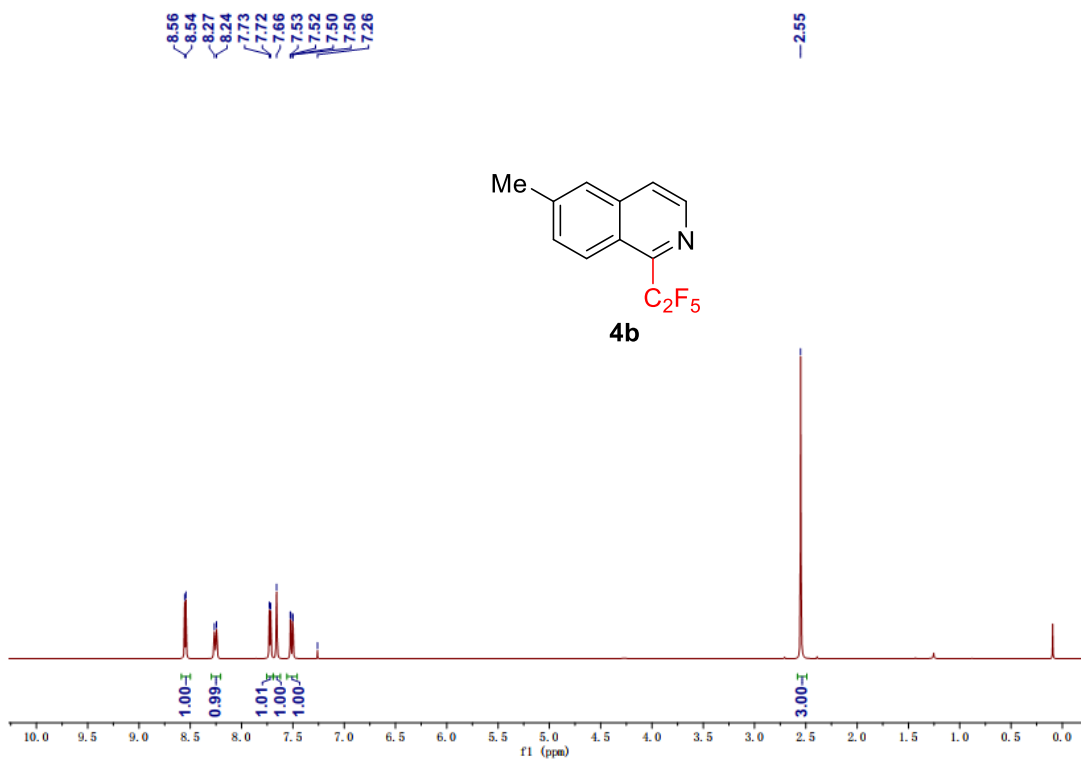

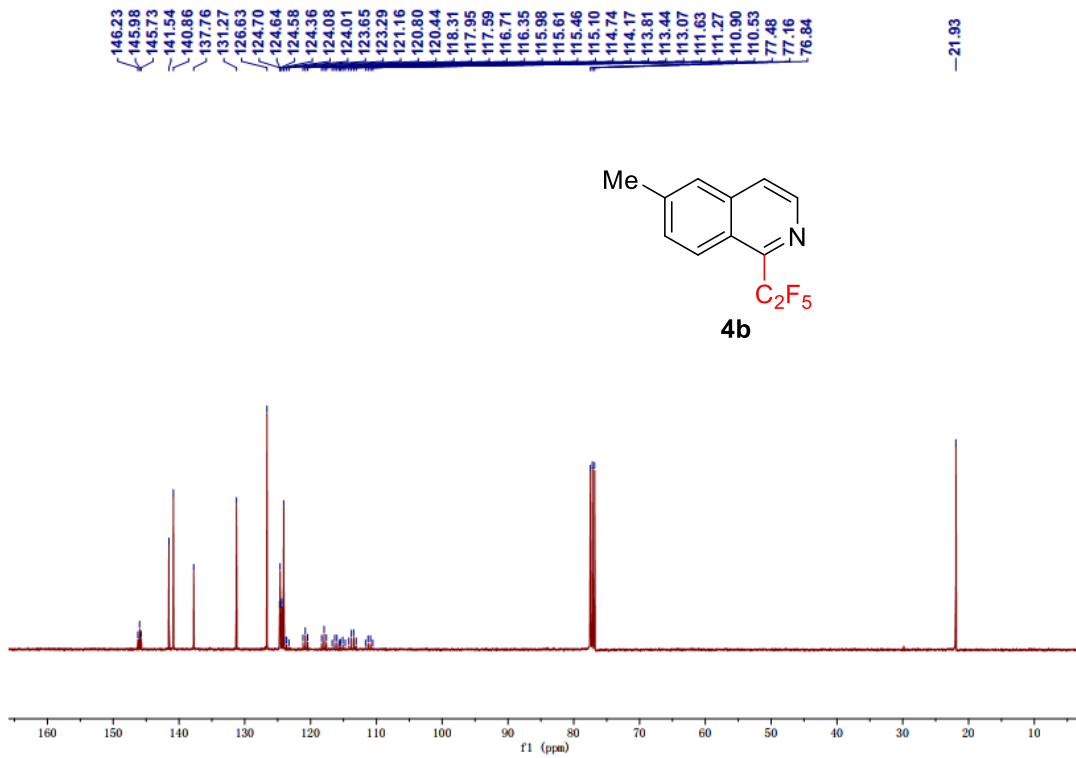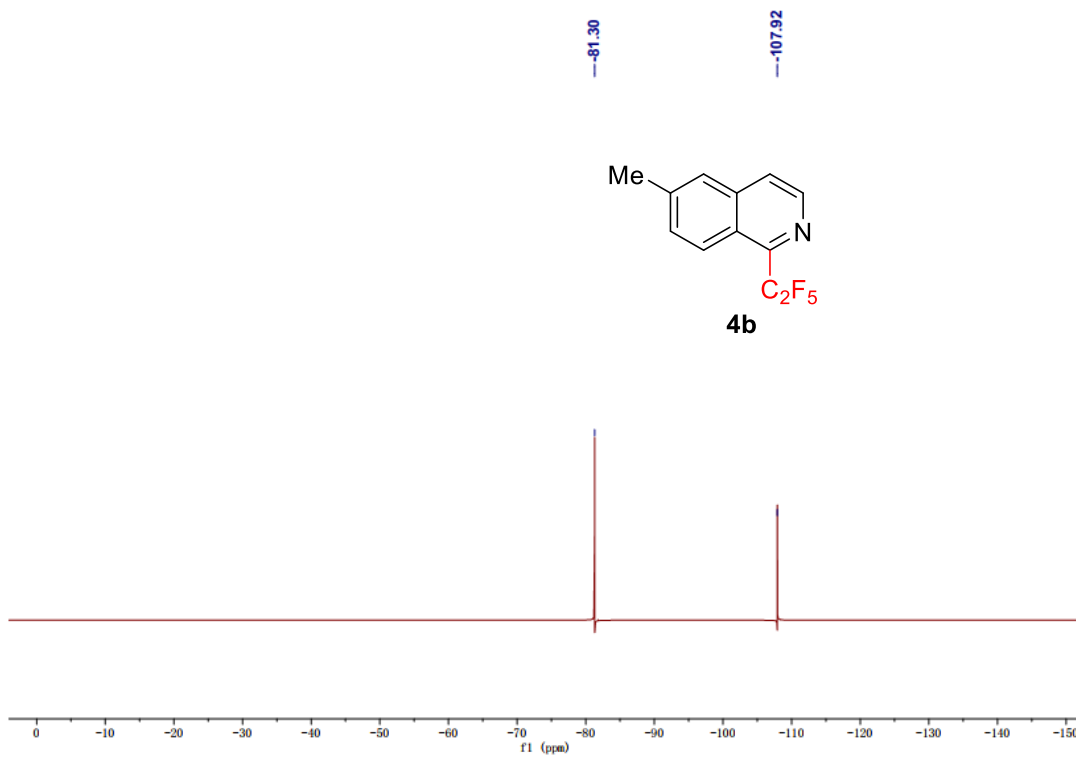

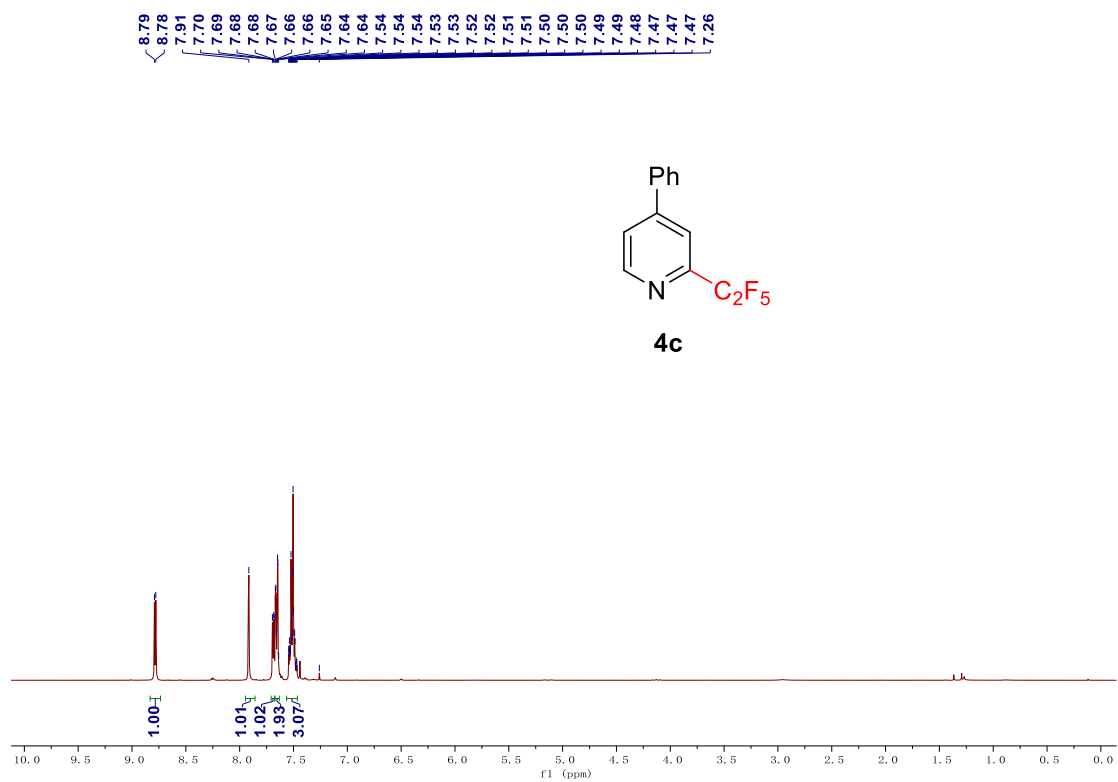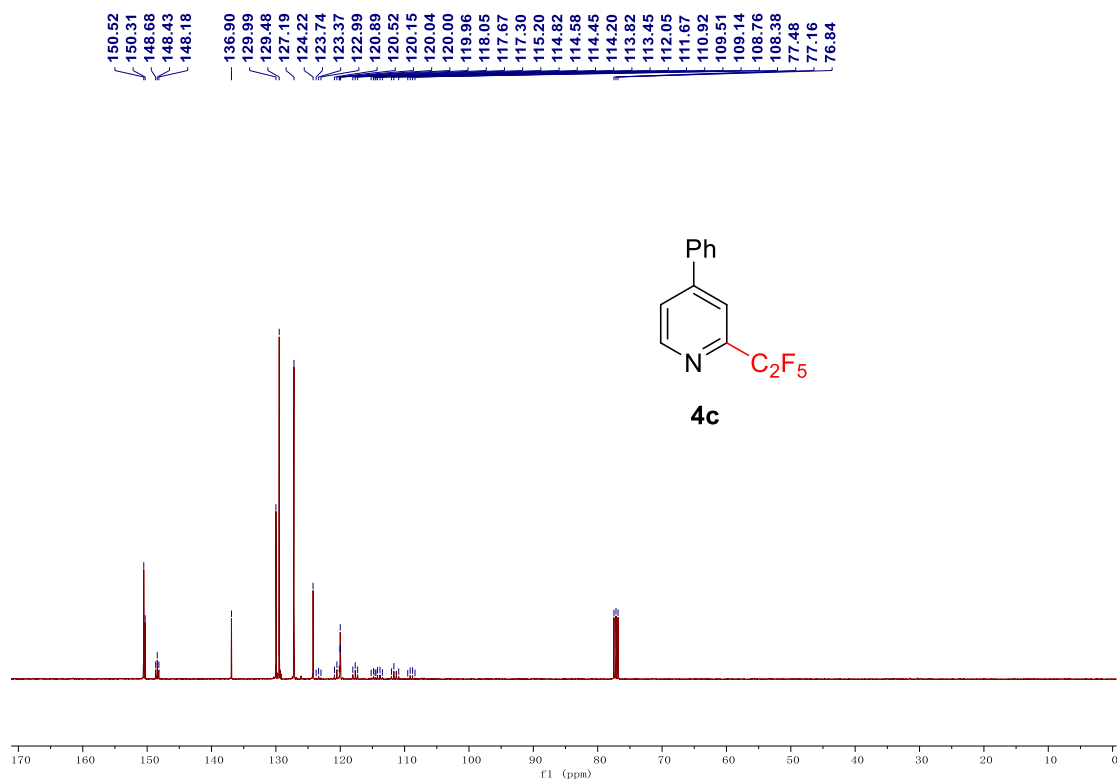

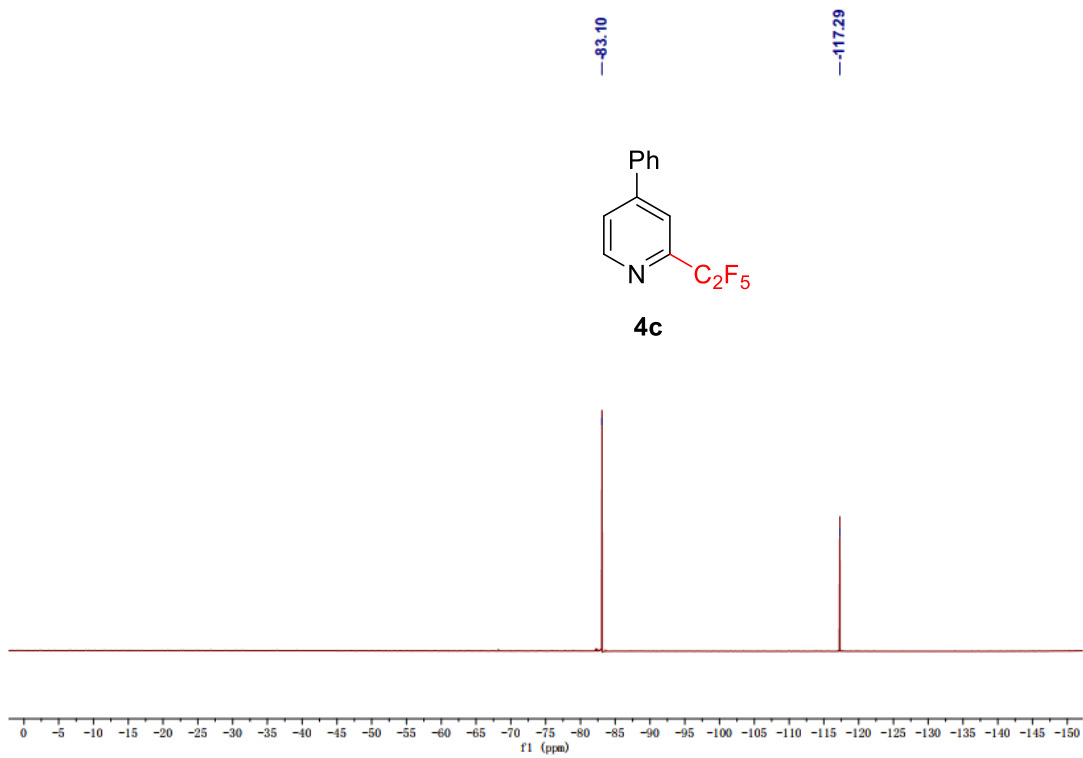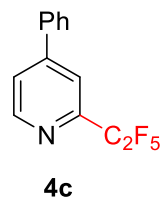

8.64  
8.37  
8.35  
7.92  
7.90  
7.85  
7.83  
7.77  
7.75  
7.73  
7.71  
7.71  
7.69  
7.69  
7.68  
7.67  
7.67  
7.26

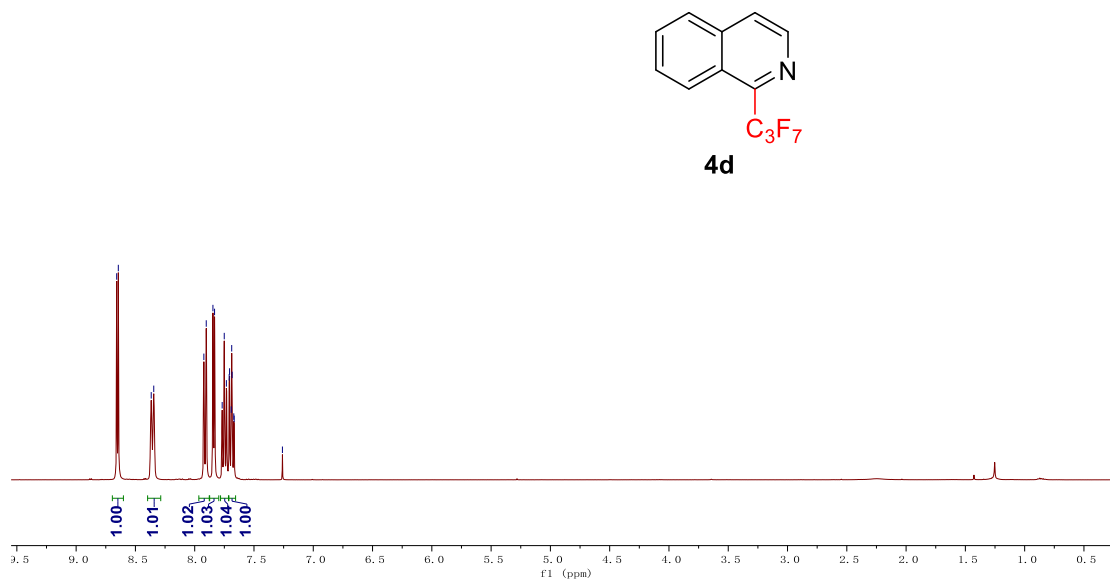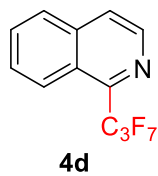

1.00  
1.01  
1.02  
1.03  
1.04  
1.00

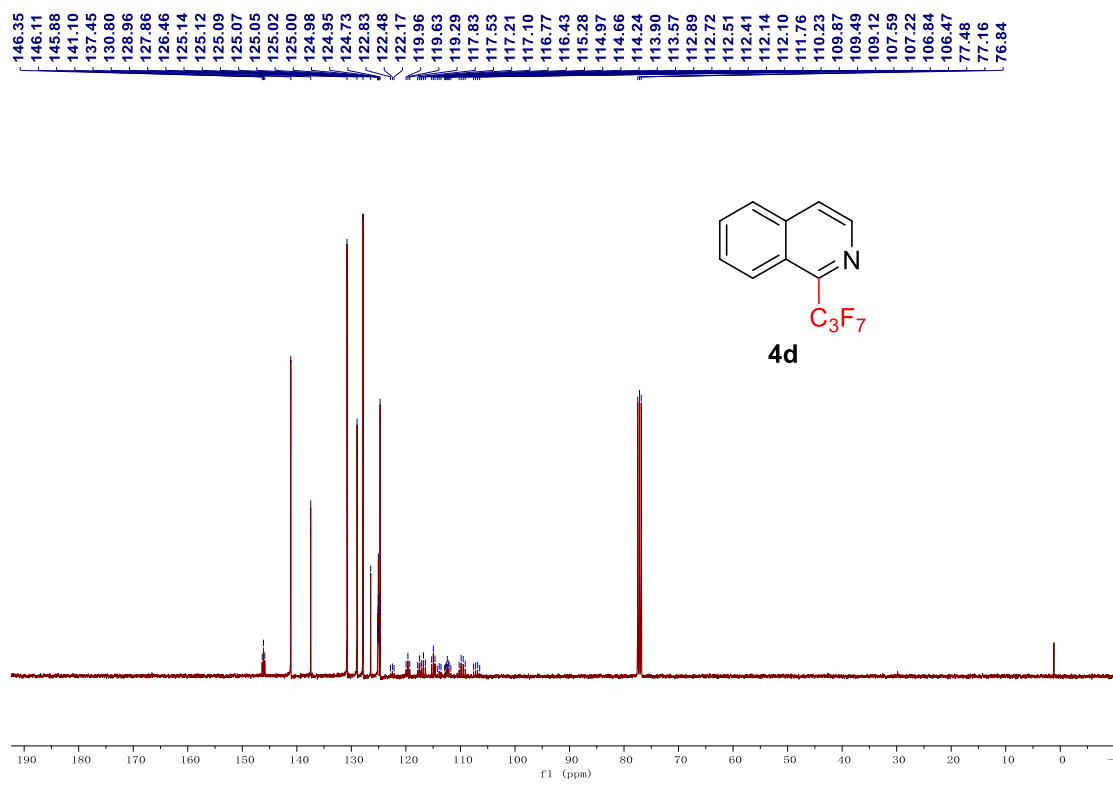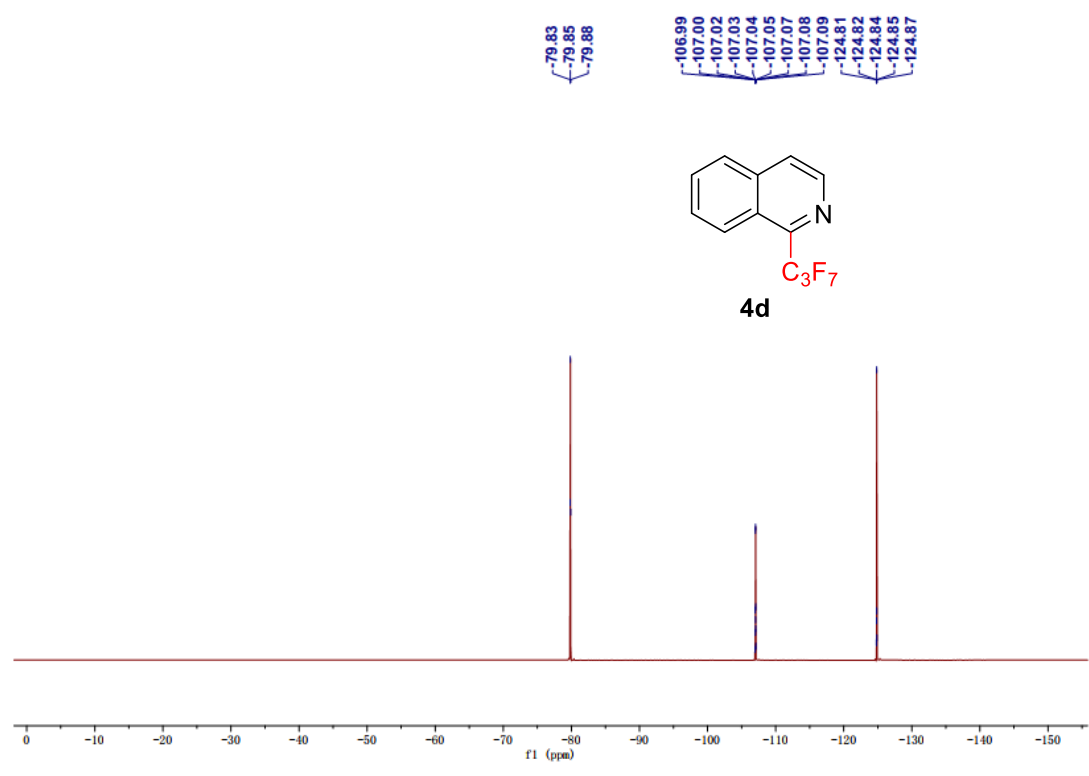

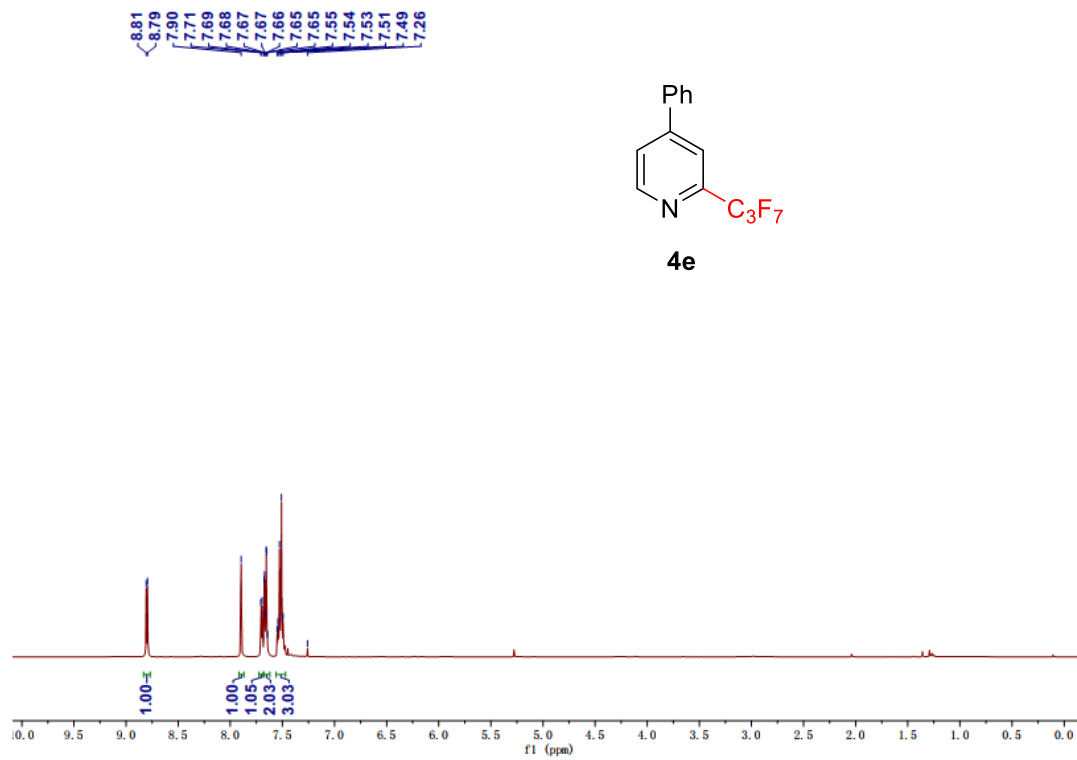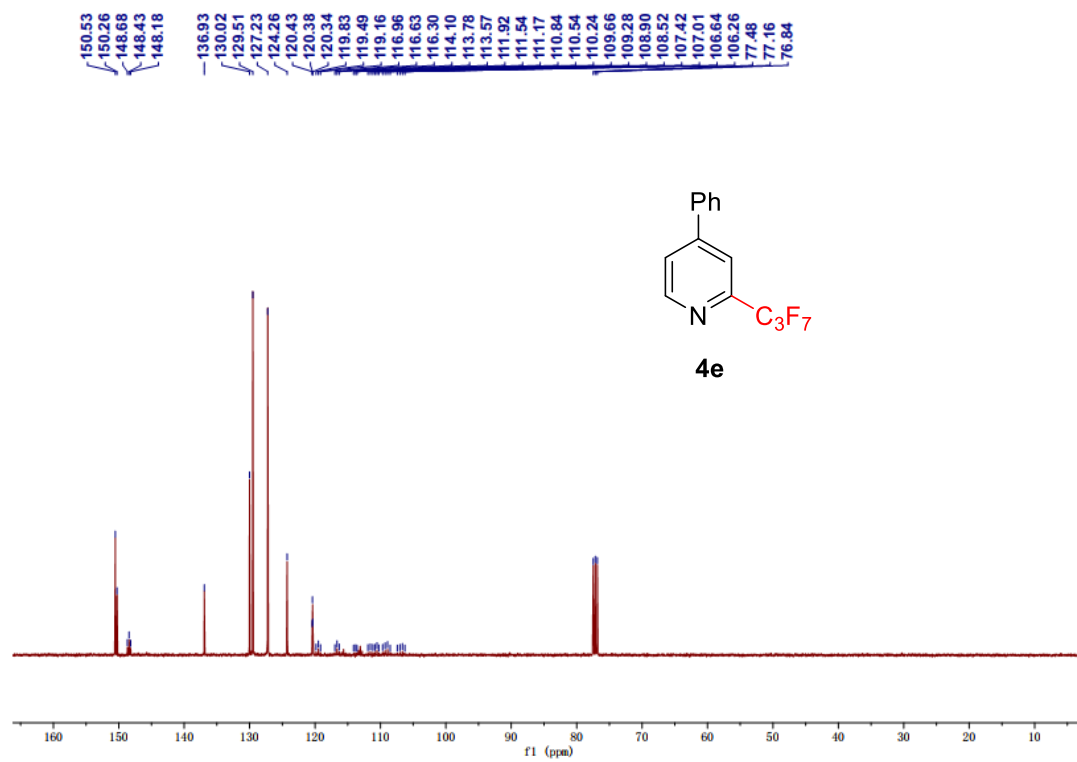



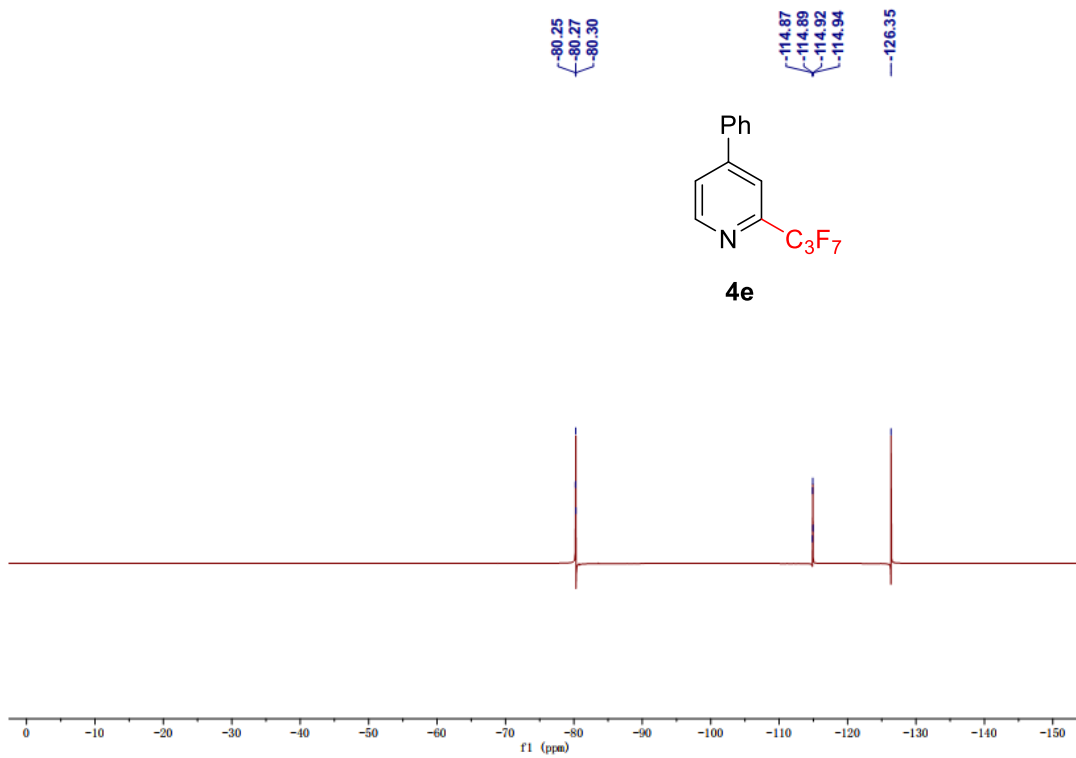

Supplement: d0cc00963f1.pdf [file d0cc00963f1.pdf]
